# Supplementary material for: A convenient nickel-catalysed hydrosilylation of carbonyl derivatives
Source: Royal Society of Chemistry journal article supplement (doi:10.1039/c2cy20509b), 2012-08-30
Supplement: c2cy20509b.pdf [file c2cy20509b.pdf]

## Electronic Supplementary Material

### A Convenient Nickel-Catalyzed Hydrosilylation of Carbonyl Derivatives

Jianxia Zheng, Christophe Darcel\* and Jean-Baptiste Sortais\*

Centre of Catalysis and Green Chemistry

Institut des Sciences Chimiques de Rennes, UMR 6226 CNRS-Université Rennes 1,

Team "Organometallics: Materials and Catalysis"

Université Rennes 1

Building 10C, Campus de Beaulieu, Ave Général Leclerc

35042 – Rennes, France

Fax: (+)33 2 23 23 69 39

E-mail: [christophe.darcel@univ-rennes1.fr](mailto:christophe.darcel@univ-rennes1.fr), [jean-baptiste.sortais@univ-rennes1.fr](mailto:jean-baptiste.sortais@univ-rennes1.fr)

#### **Table of Contents**

|                                                                                     |     |
|-------------------------------------------------------------------------------------|-----|
| I. General information                                                              | S2  |
| II. General procedures for the nickel-catalyzed hydrosilylation reactions           | S3  |
| III. Characterization of the hydrosilylation products                               | S4  |
| IV. References                                                                      | S11 |
| V. $^1\text{H}$ NMR and $^{13}\text{C}$ NMR spectra of the hydrosilylation products | S12 |

## ***I. General information.***

All reagents were obtained from commercial sources and used as received, except liquid aldehydes which were distilled prior to use. All reactions were carried out with flame-dried glassware using standard Schlenk techniques under an inert atmosphere of dry argon. Toluene and THF were dried over Braun MB-SPS-800 solvent purification system. Technical grade petroleum ether (40-60 °C bp.), ethyl acetate, dichloromethane and methanol were used for chromatography column. Analytical TLC was performed on Merck 60F254 silica gel plates (0.25 mm thickness). Column chromatography was performed on Acros Organics Ultrapure silica gel (mesh size 40-60 $\mu$ m, 60A).

$^1\text{H}$  NMR spectra were recorded in  $\text{CDCl}_3$  at ambient temperature on Bruker AVANCE 300 and 400 spectrometers at 300.1, and 400.1 MHz respectively, using the solvent as internal standard ( $\text{CDCl}_3$  7.26 ppm and  $\text{CD}_3\text{OD}$  3.31 ppm).  $^{13}\text{C}$  NMR spectra were obtained at 75 or 100 MHz and referenced to the internal solvent signals ( $\text{CDCl}_3$ , central peak is 77.16 ppm and  $\text{CD}_3\text{OD}$  central peak is 49.00 ppm). Chemical shift ( $\delta$ ) and coupling constants ( $J$ ) are given in ppm and in Hz respectively. The peak patterns are indicated as follows: (s, singlet; d, doublet; t, triplet; q, quartet; oct, octet; m, multiplet, and br. for broad).

GC analyses were performed with GC-2014 (Shimadzu) 2010 equipped with a 30-m capillary column (Supelco, SPBTM-20, fused silica capillary column, 30 M $\times$ 0.25 mm $\times$ 0.25 mm film thickness), which was used with  $\text{N}_2$ /air as vector gas. The following GC conditions were used: Initial temperature 80 °C, for 2 minutes, then rate 10 °C/min. until 220 °C and 220°C for 15 minutes.

GCMS were measured by GCMS-QP2010S (Shimadzu) with GC-2010 equipped with a 30-m capillary column (Supelco, SLBTM-5ms, fused silica capillary column, 30 M  $\times$  0.25 mm  $\times$  0.25 mm film thickness), which was used with helium as vector gas. The following GC-MS conditions were used: Initial temperature 100 °C, for 2 minutes, then rate 10 °C/min. until 250 °C and 250°C for 10 minutes.

$\text{Ni}(\text{OAc})_2 \cdot 4\text{H}_2\text{O}$  99.998% trace metals basis (lot# MKBJ2847V) was purchased from

Aldrich. Dried Ni(OAc)<sub>2</sub> was obtained by heating Ni(OAc)<sub>2</sub>·4H<sub>2</sub>O overnight at 90 °C under vacuum.<sup>[1]</sup> ICP analysis were also performed on the same batch, by the Team “Chimie du Solide et Matériaux” of the “Institut des Sciences Chimiques de Rennes”, UMR 6226, Université Rennes 1, Rennes, France. The results are listed below for Ni(OAc)<sub>2</sub>·4H<sub>2</sub>O 99.998%.

| Element | Concentration (ppm) | Teneur du composé |
|---------|---------------------|-------------------|
| Pd      | 0                   | 0,00%             |
| Fe      | 0,027               | 0,0045%           |
| Cu      | 0,032               | 0,0053%           |
| Zn      | 0,196               | 0,0326%           |
| Co      | 0,068               | 0,0113%           |

## ***II. General procedures for the nickel-catalyzed hydrosilylation reactions***

### ***a) General procedure A for the nickel-catalyzed hydrosilylation of aldehydes.***

A 10 mL oven dried Schlenk tube containing a stirring bar, was charged with Ni(OAc)<sub>2</sub>·4H<sub>2</sub>O (24.8 mg, 0.1 mmol). After purging with argon (argon-vacuum three cycles), THF (4 mL) was added followed by PCy<sub>3</sub> (336 µL, 0.2 mmol, 20 % in toluene from Stern), PMHS (360 µL, 3 mmol) and aldehyde (2 mmol). The reaction mixture was stirred in a preheated oil bath at 70 °C for 16h. After cooling down to room temperature, 2 mL MeOH was added followed by 3 mL of 2M NaOH solution with vigorous stirring. The reaction mixture was further stirred for 16 hours at room temperature and was extracted with diethyl ether (3×10mL). The combined organic layers were dried over anhydrous MgSO<sub>4</sub>, filtered and concentrated in *vacuo*. The residue was purified by silica gel column chromatography using ethyl acetate-petroleum ether mixture (10 to 50%) or methanol-dichloromethane to achieve the desired product.

### ***b) General procedure B for the nickel-catalyzed hydrosilylation of ketones.***

A 10 mL oven dried Schlenk tube containing a stirring bar, was charged with Ni(OAc)<sub>2</sub>·4H<sub>2</sub>O (24.8 mg, 0.1 mmol). After purging with argon (argon-vacuum three cycles), toluene (4 mL) was added followed by PCy<sub>3</sub> (336 µL, 0.2 mmol, 20 % in

toluene from Stern), PMHS (480  $\mu\text{L}$ , 8 mmol) and ketone (2 mmol). The reaction mixture was stirred in a preheated oil bath at 100  $^{\circ}\text{C}$  for 16 h. After cooling down to room temperature, 2 mL of MeOH was added followed by 4 mL of 2M NaOH solution with vigorous stirring. The reaction mixture was further stirred for 16 hours at room temperature and was extracted with diethyl ether (3 $\times$ 10mL). The combined organic layers were dried over anhydrous  $\text{MgSO}_4$ , filtered and concentrated in *vacuo*. The residue was purified by silica gel column chromatography using ethyl acetate-petroleum ether mixture (10 to 50%) to achieve the desired product.

### III. Characterization of the hydrosilylation products

#### Benzyl alcohol <sup>[2]</sup> (Table 2, entry 1)

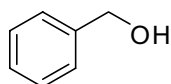

The compound was prepared as described in the general procedure **A** (m = 183 mg, 85 % isolated yield).  $^1\text{H}$  NMR (300 MHz,  $\text{CDCl}_3$ ):  $\delta$  7.38-7.26 (m, 5H), 4.69 (s, 2H), 1.77 (br. s, 1H).  $^{13}\text{C}$  { $^1\text{H}$ } NMR (75 MHz,  $\text{CDCl}_3$ ):  $\delta$  140.9, 128.7, 127.8, 127.1, 65.5.

#### 4-Methoxybenzyl alcohol <sup>[2]</sup> (Table 2, entry 2)

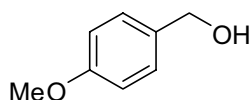

The compound was prepared as described in the general procedure **A** (m = 263 mg, 95 % isolated yield).  $^1\text{H}$  NMR (400 MHz,  $\text{CDCl}_3$ ):  $\delta$  7.29 (d,  $J$  = 8.4, 2H), 6.90 (d,  $J$  = 8.4, 2H), 4.61 (s, 2H), 3.81 (s, 3H), 1.60 (br. s, 1H).  $^{13}\text{C}$  { $^1\text{H}$ } NMR (100 MHz,  $\text{CDCl}_3$ ):  $\delta$  159.4, 133.3, 128.8, 114.1, 65.2, 55.4.

#### 4-(*N,N*-Dimethylamino)phenylmethanol <sup>[2]</sup> (Table 2, entry 3)

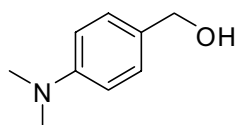

The compound was prepared as described in the general procedure **A** (m = 273 mg, 90 % isolated yield).  $^1\text{H}$  NMR (400 MHz,  $\text{CDCl}_3$ ):  $\delta$  7.24 (d,  $J$  = 8.7, 2H), 6.73 (d,  $J$  = 8.7, 2H), 4.56 (s, 2H), 2.95 (s, 6H), 1.79 (br. s, 1H).  $^{13}\text{C}$  { $^1\text{H}$ } NMR (100 MHz,  $\text{CDCl}_3$ ):

$\delta$  150.5, 129.1, 128.7, 112.7, 65.4, 40.8.

#### 4-Nitrobenzyl alcohol <sup>[3]</sup> (Table 2, entry 4)

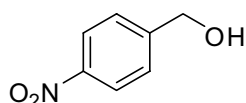

The compound was prepared as described in the general procedure **A** ( $m$  = 214 mg, 70 % isolated yield). <sup>1</sup>H NMR (400 MHz, CDCl<sub>3</sub>):  $\delta$  8.21 (d,  $J$  = 8.7, 2H), 7.53 (d,  $J$  = 8.7, 2H), 4.84 (d,  $J$  = 4.4, 2H), 1.98 (t,  $J$  = 4.4, 1H). <sup>13</sup>C {<sup>1</sup>H} NMR (100 MHz, CDCl<sub>3</sub>):  $\delta$  148.3, 147.5, 127.1, 123.9, 64.2.

#### Methyl 4-(hydroxymethyl)benzoate <sup>[3]</sup> (Table 2, entry 7)

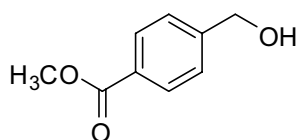

The compound was prepared as described in the general procedure **A** on 1 mmol scale ( $m$  = 136 mg, 83 % isolated yield). <sup>1</sup>H NMR (400 MHz, CDCl<sub>3</sub>):  $\delta$  7.99 (d,  $J$  = 8.2, 2H), 7.40 (d,  $J$  = 8.2, 2H), 4.73 (s, 2H), 3.89 (s, 3H), 2.32 (br. s, 1H). <sup>13</sup>C {<sup>1</sup>H} NMR (100 MHz, CDCl<sub>3</sub>):  $\delta$  167.1, 146.2, 129.9, 129.3, 126.5, 64.7, 52.2.

#### N-(4-(Hydroxymethyl)phenyl)acetamide <sup>[4]</sup> (Table 2, entry 8)

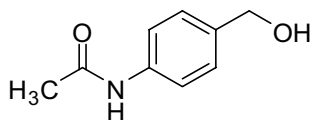

The compound was prepared as described in the general procedure **A** ( $m$  = 290 mg, 88 % isolated yield). <sup>1</sup>H NMR (400 MHz, CD<sub>3</sub>OD):  $\delta$  7.51 (d,  $J$  = 8.5, 2H), 7.29 (d,  $J$  = 8.5, 2H), 4.55 (s, 2H), 2.11 (s, 3H). <sup>13</sup>C {<sup>1</sup>H} NMR (100 MHz, CD<sub>3</sub>OD):  $\delta$  171.6, 139.0, 138.5, 128.6, 121.1, 64.8, 23.7.

#### 2-Tolylmethanol <sup>[2]</sup> (Table 2, entry 9)

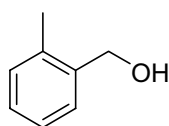

The compound was prepared as described in the general procedure **A** ( $m$  = 210 mg, 87 % isolated yield). <sup>1</sup>H NMR (400 MHz, CDCl<sub>3</sub>):  $\delta$  7.37-7.33 (m, 1H), 7.24-7.17 (m,

3H), 4.70 (s, 2H), 2.36 (s, 3H), 1.68 (br. s, 1H).  $^{13}\text{C}$   $\{^1\text{H}\}$  NMR (100 MHz,  $\text{CDCl}_3$ ):  $\delta$  138.8, 136.2, 130.5, 127.9, 127.7, 126.2, 63.7, 18.8.

### 2,6-Dimethylhept-5-en-1-ol (Table 2, entry 11)

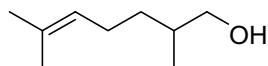

The compound was prepared as described in the general procedure **A** ( $m = 210$  mg, 74 % isolated yield).  $^1\text{H}$  NMR (400 MHz,  $\text{CDCl}_3$ ):  $\delta$  5.10 (t,  $J = 7.2$ , 1H), 3.52-3.39 (m, 2H), 2.09-1.92 (m, 2H), 1.68 (s, 3H), 1.60 (s, 3H), 1.47-1.10 (m, 3H), 0.93 (d,  $J = 6.7$ , 3H).  $^{13}\text{C}$   $\{^1\text{H}\}$  NMR (100 MHz,  $\text{CDCl}_3$ ):  $\delta$  131.6, 124.7, 68.4, 35.5, 33.4, 25.8, 25.5, 17.8, 16.7.

### Furan-2-ylmethanol <sup>[5]</sup> (Table 2, entry 12)

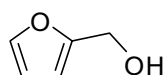

The compound was prepared as described in the general procedure **A** ( $m = 137$  mg, 70 % isolated yield).  $^1\text{H}$  NMR (400 MHz,  $\text{CDCl}_3$ ):  $\delta$  7.39 (d,  $J = 1.0$ , 1H), 6.33 (dd,  $J = 3.0$ ,  $J = 1.0$ , 1H), 6.28 (d,  $J = 3.0$ , 1H), 4.59 (s, 2H), 2.05 (br. s, 1H).  $^{13}\text{C}$   $\{^1\text{H}\}$  NMR (100 MHz,  $\text{CDCl}_3$ ):  $\delta$  154.1, 142.7, 110.5, 107.9, 57.5.

### (1-Methylpyrrol-2-yl)methanol (Table 2, entry 13)

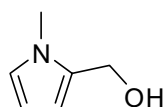

The compound was prepared as described in the general procedure **A** ( $m = 109$  mg, 49 % isolated yield).  $^1\text{H}$  NMR (400 MHz,  $\text{CDCl}_3$ ):  $\delta$  6.64 (br. s, 1H), 6.11 (br. s, 1H), 6.06 (br. s, 1H), 4.59 (s, 2H), 3.69 (s, 3H), 1.46 (br. s, 1H).  $^{13}\text{C}$   $\{^1\text{H}\}$  NMR (100 MHz,  $\text{CDCl}_3$ ):  $\delta$  131.9, 123.7, 109.0, 106.9, 56.9, 33.8.

### Ferrocenemethanol <sup>[2]</sup> (Table 2, entry 14)

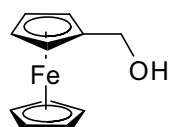

The compound was prepared as described in the general procedure **A** ( $m = 397$  mg, 92 % isolated yield).  $^1\text{H}$  NMR (400 MHz,  $\text{CDCl}_3$ ):  $\delta$  4.33 (m, 2H), 4.24 (m, 2H), 4.18

(m, 7H), 1.51 (br. s, 1H).  $^{13}\text{C}$  { $^1\text{H}$ } NMR (100 MHz,  $\text{CDCl}_3$ ):  $\delta$  88.6, 68.5, 68.4, 68.0, 60.9.

### 1-Phenylethanol <sup>[2]</sup> (Table 3, entry 1)

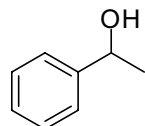

The compound was prepared as described in the general procedure **B** (m = 210 mg, 86 % isolated yield).  $^1\text{H}$  NMR (300 MHz,  $\text{CDCl}_3$ ):  $\delta$  7.39-7.26 (m, 5H), 4.90 (q,  $J$  = 6.4, 1H), 1.87 (br. s, 1H), 1.50 (d,  $J$  = 6.4, 3H).  $^{13}\text{C}$  { $^1\text{H}$ } NMR (100 MHz,  $\text{CDCl}_3$ ):  $\delta$  145.9, 128.6, 127.6, 125.5, 70.6, 25.3.

### 1-(4'-Methylphenyl)ethanol <sup>[2]</sup> (Table 3, entry 2)

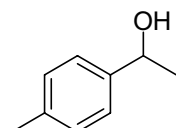

The compound was prepared as described in the general procedure **B** (m = 192 mg, 70 % isolated yield).  $^1\text{H}$  NMR (300 MHz,  $\text{CDCl}_3$ ):  $\delta$  7.27 (d,  $J$  = 8.0, 2H), 7.17 (d,  $J$  = 8.0, 2H), 4.86 (q,  $J$  = 6.4, 1H), 2.36 (s, 3H), 1.92 (br. s, 1H), 1.49 (d,  $J$  = 6.4, 3H).  $^{13}\text{C}$  { $^1\text{H}$ } NMR (100 MHz,  $\text{CDCl}_3$ ):  $\delta$  143.0, 137.2, 129.3, 125.5, 70.3, 25.2, 21.2.

### 1-(4'-Methoxyphenyl)ethanol <sup>[2]</sup> (Table 3, entry 3)

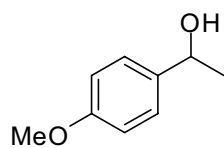

The compound was prepared as described in the general procedure **B** (m = 213 mg, 68 % isolated yield).  $^1\text{H}$  NMR (400 MHz,  $\text{CDCl}_3$ ):  $\delta$  7.29 (d,  $J$  = 8.6, 2H), 6.88 (d,  $J$  = 8.6, 2H), 4.85 (q,  $J$  = 6.4, 1H), 3.80 (s, 3H), 1.85 (br. s, 1H), 1.48 (d,  $J$  = 6.4, 3H).  $^{13}\text{C}$  { $^1\text{H}$ } NMR (100 MHz,  $\text{CDCl}_3$ ):  $\delta$  159.1, 138.1, 126.8, 114.0, 70.1, 55.4, 25.1.

### 1-(4'-Fluorophenyl)ethanol <sup>[2]</sup> (Table 3, entry 6)

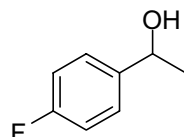

The compound was prepared as described in the general procedure **B** (m = 181 mg, 65 % isolated yield).  $^1\text{H}$  NMR (400 MHz,  $\text{CDCl}_3$ ):  $\delta$  7.34-7.31 (m, 2H), 7.04-7.00 (m, 2H), 4.87 (q,  $J = 6.4$ , 1H), 2.00 (br. s, 1H), 1.46 (d,  $J = 6.4$ , 3H).  $^{13}\text{C}$   $\{^1\text{H}\}$  NMR (100 MHz,  $\text{CDCl}_3$ ):  $\delta$  162.2 (d,  $J_{\text{C-F}} = 245$ ), 141.6 (d,  $J_{\text{C-F}} = 3$ ), 127.2 (d,  $J_{\text{C-F}} = 8$ ), 115.4 (d,  $J_{\text{C-F}} = 21$ ), 69.9, 25.4.  $^{19}\text{F}$  NMR (376 MHz,  $\text{CDCl}_3$ ):  $\delta$  -115.38.

### 2,2,2-Trifluoro-1-phenylethanol <sup>[2]</sup> (Table 3, entry 8)

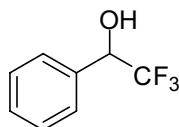

The compound was prepared as described in the general procedure **B** (m = 255 mg, 92 % isolated yield).  $^1\text{H}$  NMR (400 MHz,  $\text{CDCl}_3$ ):  $\delta$  7.47-7.41 (m, 5H), 5.01 (q,  $J_{\text{F-H}} = 6.2$ , 1H), 2.83 (br. s, 1H).  $^{13}\text{C}$   $\{^1\text{H}\}$  NMR (100 MHz,  $\text{CDCl}_3$ ):  $\delta$  134.1, 129.7, 128.8, 127.6, 124.4 (q,  $J_{\text{C-F}} = 282.1$ ), 73.0 (q,  $J_{\text{C-F}} = 32.0$ ).  $^{19}\text{F}$  NMR (376 MHz,  $\text{CDCl}_3$ ):  $\delta$  -78.34 (d,  $J_{\text{F-H}} = 6.7$ )

### 1-Mesitylethanol <sup>[2]</sup> (Table 3, entry 9)

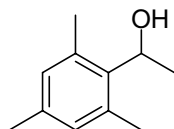

The compound was prepared as described in the general procedure **B** (m = 260 mg, 79 % isolated yield).  $^1\text{H}$  NMR (400 MHz,  $\text{CDCl}_3$ ):  $\delta$  6.82 (s, 2H), 5.37 (q,  $J = 6.7$ , 1H), 2.42 (s, 6H), 2.25 (s, 3H), 1.68 (br. s, 1H), 1.53 (d,  $J = 6.7$ , 3H).  $^{13}\text{C}$   $\{^1\text{H}\}$  NMR (100 MHz,  $\text{CDCl}_3$ ):  $\delta$  137.8, 136.6, 135.8, 130.3, 67.6, 21.8, 20.8, 20.7.

### 2-Methyl-1-phenylpropan-1-ol <sup>[6]</sup> (Table 3, entry 10)

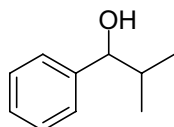

The compound was prepared as described in the general procedure **B** (m = 271 mg, 90 % isolated yield).  $^1\text{H}$  NMR (400 MHz,  $\text{CDCl}_3$ ):  $\delta$  7.36-7.26 (m, 5H), 4.37 (d,  $J = 6.9$ , 2H), 1.96 (oct,  $J = 6.8$ , 1H), 1.84 (br. s, 1H), 1.00 (d,  $J = 6.7$ , 3H), 0.80 (d,  $J = 6.8$ , 3H).  $^{13}\text{C}$   $\{^1\text{H}\}$  NMR (100 MHz,  $\text{CDCl}_3$ ):  $\delta$  143.8, 128.3, 127.6, 126.7, 80.2, 35.4, 19.1, 18.4.



### 2,2-Dimethyl-1-phenylpropan-1-ol <sup>[7]</sup> (Table 3, entry 11)

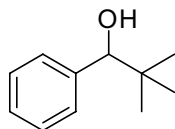

The compound was prepared as described in the general procedure **B** (m = 374 mg, 95 % isolated yield). <sup>1</sup>H NMR (400 MHz, CDCl<sub>3</sub>): δ 7.31-7.27 (m, 5H), 4.40 (d, *J* = 2.1, 1H), 1.84 (d, *J* = 2.4, 1H), 0.93 (s, 9H). <sup>13</sup>C {<sup>1</sup>H} NMR (100 MHz, CDCl<sub>3</sub>): δ 142.3, 127.7, 127.7, 127.4, 82.5, 35.8, 26.1.

### 4-Phenylbutan-2-ol <sup>[8]</sup> (Table 3, entry 12)

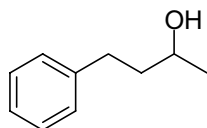

The compound was prepared as described in the general procedure **B** (m = 236 mg, 79 % isolated yield). <sup>1</sup>H NMR (400 MHz, CDCl<sub>3</sub>): δ 7.35-7.30 (m, 2H), 7.26-7.22 (m, 3H), 3.88 (m, 1H), 2.84-2.68 (m, 2H), 1.89-1.64 (m, 2H), 1.64 (br. s, 1H), 1.28 (d, *J* = 6.2, 3H). <sup>13</sup>C {<sup>1</sup>H} NMR (100 MHz, CDCl<sub>3</sub>): δ 142.2, 128.5 (2C), 125.9, 67.6, 41.0, 32.3, 23.7.

### 2-Undecanol <sup>[9]</sup> (Table 3, entry 13)

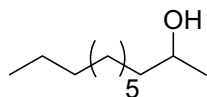

The compound was prepared as described in the general procedure **B** (m = 322 mg, 94 % isolated yield). <sup>1</sup>H NMR (400 MHz, CDCl<sub>3</sub>): δ 3.79 (m, 1H), 1.45-1.18 (m, 20H), 0.88 (m, 3H). <sup>13</sup>C {<sup>1</sup>H} NMR (100 MHz, CDCl<sub>3</sub>): δ 68.4, 39.5, 32.0, 29.8, 29.8, 29.7, 29.5, 25.9, 23.6, 22.8, 14.3.

### Cycloheptanol <sup>[2]</sup> (Table 3, entry 14)

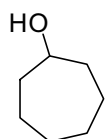

The compound was prepared as described in the general procedure **B** (m = 159 mg, 70 % isolated yield). <sup>1</sup>H NMR (400 MHz, CDCl<sub>3</sub>): δ 3.82 (m, 1H), 1.93-1.86 (m, 2H),

1.66-1.35 (m, 11H).  $^{13}\text{C}$   $\{^1\text{H}\}$  NMR (100 MHz,  $\text{CDCl}_3$ ):  $\delta$  72.9, 37.7, 28.2, 22.7.

### $\alpha$ -tetralol <sup>[2]</sup> (Table 3, entry 15)

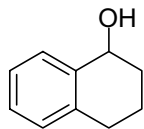

The compound was prepared as described in the general procedure **B** (m = 124 mg, 42 % isolated yield).  $^1\text{H}$  NMR (400 MHz,  $\text{CDCl}_3$ ):  $\delta$  7.45-7.42 (m, 1H), 7.24-7.18 (m, 2H), 7.12-7.10 (m, 1H), 4.78 (t,  $J$  = 4.6, 1H), 2.87-2.80 (m, 1H), 2.77-2.69 (m, 1H), 2.01-1.86 (m, 3H), 1.84-1.73 (m, 2H).  $^{13}\text{C}$   $\{^1\text{H}\}$  NMR (100 MHz,  $\text{CDCl}_3$ ):  $\delta$  138.9, 137.2, 129.1, 128.8, 127.7, 126.3, 68.3, 32.4, 29.4, 18.9.

### 1-Indanol <sup>[5]</sup> (Table 3, entry 16)

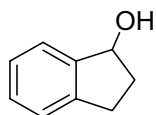

The compound was prepared as described in the general procedure **B** (m = 172 mg, 64 % isolated yield).  $^1\text{H}$  NMR (400 MHz,  $\text{CDCl}_3$ ):  $\delta$  7.43-7.41 (m, 1H), 7.26-7.24 (m, 3H), 5.25 (t,  $J$  = 5.9, 1H), 3.10-3.03 (m, 1H), 2.86-2.79 (m, 1H), 2.53-2.45 (m, 1H), 1.99-1.91 (m, 1H), 1.79 (br. s, 1H).  $^{13}\text{C}$   $\{^1\text{H}\}$  NMR (100 MHz,  $\text{CDCl}_3$ ):  $\delta$  145.1, 143.4, 128.4, 126.8, 125.0, 124.3, 76.6, 36.1, 29.9.

### 1-(2,5-Dimethylfuran-3-yl)ethanol <sup>[10]</sup> (Table 3, entry 17)

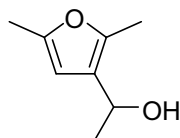

The compound was prepared as described in the general procedure **B** (m = 173 mg, 62 % isolated yield).  $^1\text{H}$  NMR (400 MHz,  $\text{CDCl}_3$ ):  $\delta$  5.94 (s, 1H), 4.75 (q,  $J$  = 6.4, 1H), 2.22 (s, 3H), 2.21 (s, 3H), 1.73 (br. s, 1H), 1.40 (d,  $J$  = 6.4, 3H).  $^{13}\text{C}$   $\{^1\text{H}\}$  NMR (100 MHz,  $\text{CDCl}_3$ ):  $\delta$  145.0, 145.7, 124.2, 104.2, 62.8, 23.9, 13.5, 11.8.

### Ferrocenylethan-1-ol <sup>[11]</sup> (Table 3, entry 20)

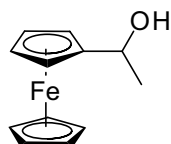

The compound was prepared as described in the general procedure **B** ( $m = 252$  mg, 55 % isolated yield).  $^1\text{H}$  NMR (400 MHz,  $\text{CDCl}_3$ ):  $\delta$  4.55 (q,  $J = 6.2$ , 1H), 4.20-4.17 (m, 9H), 1.85 (br. s, 1H), 1.44 (d,  $J = 6.2$ , 1H).  $^{13}\text{C}$   $\{^1\text{H}\}$  NMR (100 MHz,  $\text{CDCl}_3$ ):  $\delta$  95.0, 68.4, 68.0, 68.0, 66.3, 66.2, 65.7, 23.8.

#### IV. References.

- [1] Q. Songsheng, F. Ying, Y. Ruili, L. Liangchao, *Thermochimica Acta*, **1997**, 303, 47.
- [2] L. C. Misal Castro, D. Bézier, J.-B. Sortais, C. Darcel, *Adv. Synth. Catal.* **2011**, 353, 1279.
- [3] N. S. Shaikh, K. Junge, M. Beller, *Org. Lett.* **2007**, 9, 5429.
- [4] D. Das, S. Roy, P. K. Das, *Org. Lett.* **2004**, 6, 4133.
- [5] D. Bézier, F. Jiang, T. Roisnel, J.-B. Sortais, C. Darcel, *Eur. J. Inorg. Chem.* **2012**, 1333.
- [6] M. Hatano, O. Ito, S. Suzuki, K. Ishihara, *J. Org. Chem.* **2010**, 75, 5008.
- [7] E. Buitrago, F. Tinnis, H. Adolfsson, *Adv. Synth. Catal.* **2012**, 354, 217.
- [8] Q. Zhao, D. P. Curran, M. Malacria, L. Fensterbank, J.-P. Goddard, E. Lacôte, *Chem. Eur. J.* **2011**, 17, 9911.
- [9] J. Gibka, M. Glinski, *Flavour Fragr. J.* **2008**, 23, 147.
- [10] H. Shimizu, T. Nagano, N. Sayo, T. Saito, T. Ohshima, K. Mashima, *Synlett* **2009**, 3143.
- [11] M. N. Cheemala, M. Gayral, J. M. Brown, K. Rossen, P. Knochel, *Synthesis* **2007**, 3877.

#### V. $^1\text{H}$ NMR and $^{13}\text{C}$ NMR spectra of the hydrosilylation products.

### Benzyl alcohol

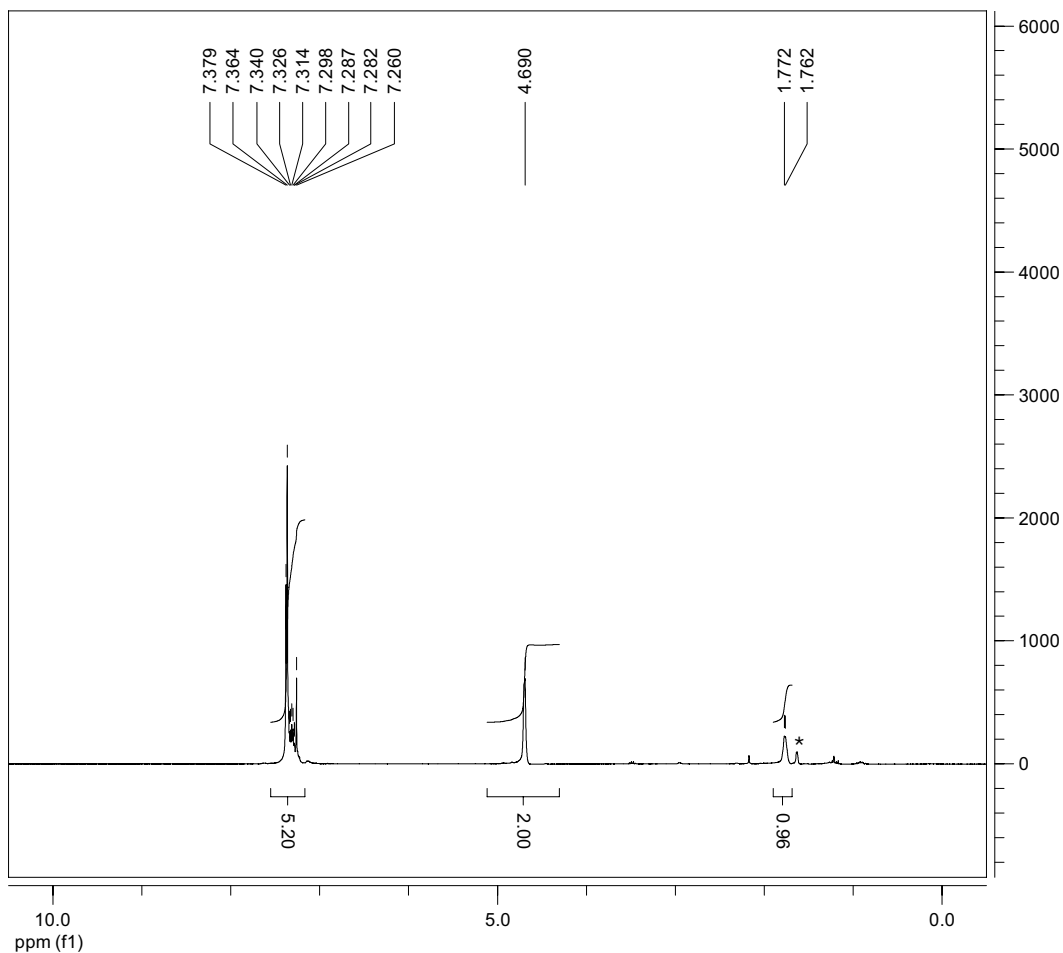

**Date:**  
22 May 2012  
**Document's Title:**  
fid  
**Spectrum Title:**  
CDZJX604  
**Frequency (MHz):**  
(f1) 300.132  
**Original Points Count:**  
(f1) 16384  
**Actual Points Count:**  
(f1) 32768  
**Acquisition Time (sec):**  
(f1) 2.6542  
**Spectral Width (ppm):**  
(f1) 20.567  
**Pulse Program:**  
ZG30  
**Temperature:**  
296.1371  
**Number of Scans:**  
8  
**Acq. Date:**  
Fri Apr 20 10:06:07 AM

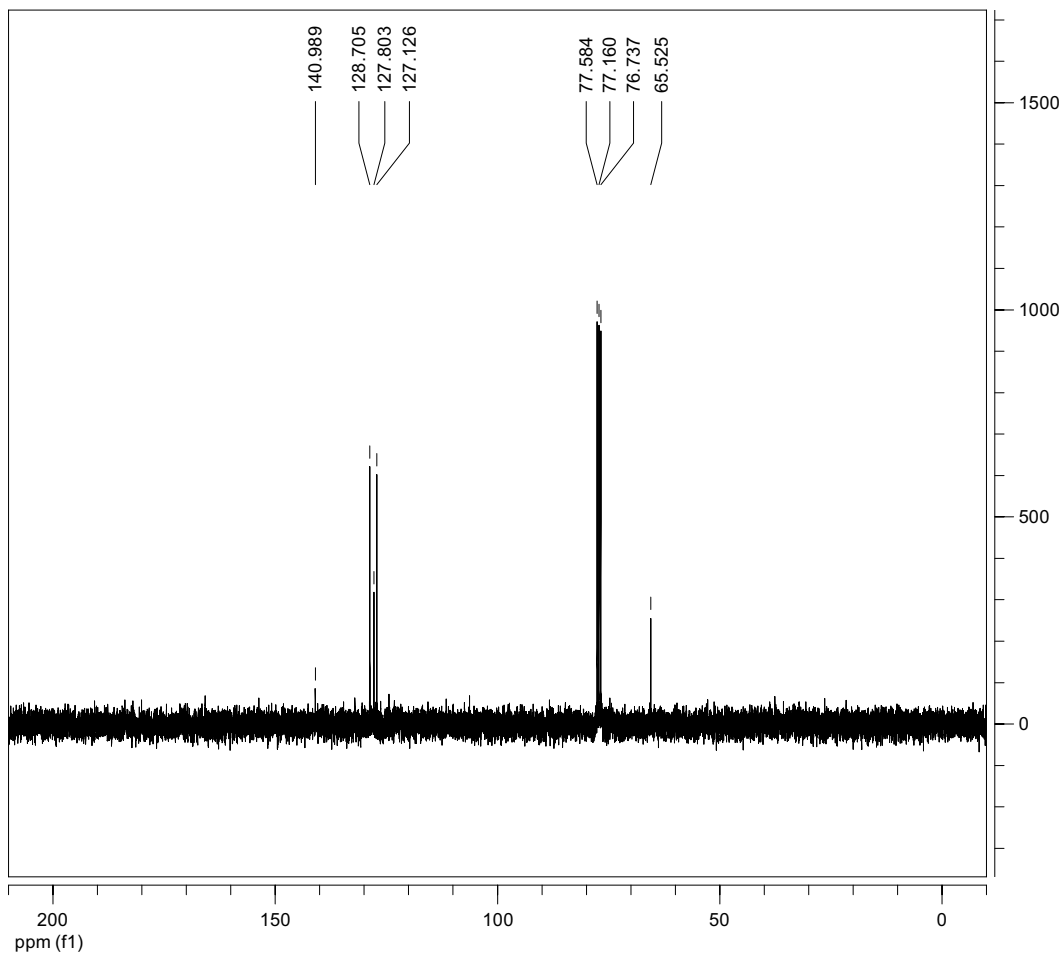

**Date:**  
22 May 2012  
**Document's Title:**  
10  
**Spectrum Title:**  
CDZJX604  
**Frequency (MHz):**  
(f1) 75.475  
**Original Points Count:**  
(f1) 32768  
**Actual Points Count:**  
(f1) 65536  
**Acquisition Time (sec):**  
(f1) 1.8219  
**Spectral Width (ppm):**  
(f1) 238.298  
**Pulse Program:**  
ZGPC30  
**Temperature:**  
296.7506  
**Number of Scans:**  
47  
**Acq. Date:**  
Fri Apr 20 10:11:42 AM

### 4-Methoxybenzyl alcohol

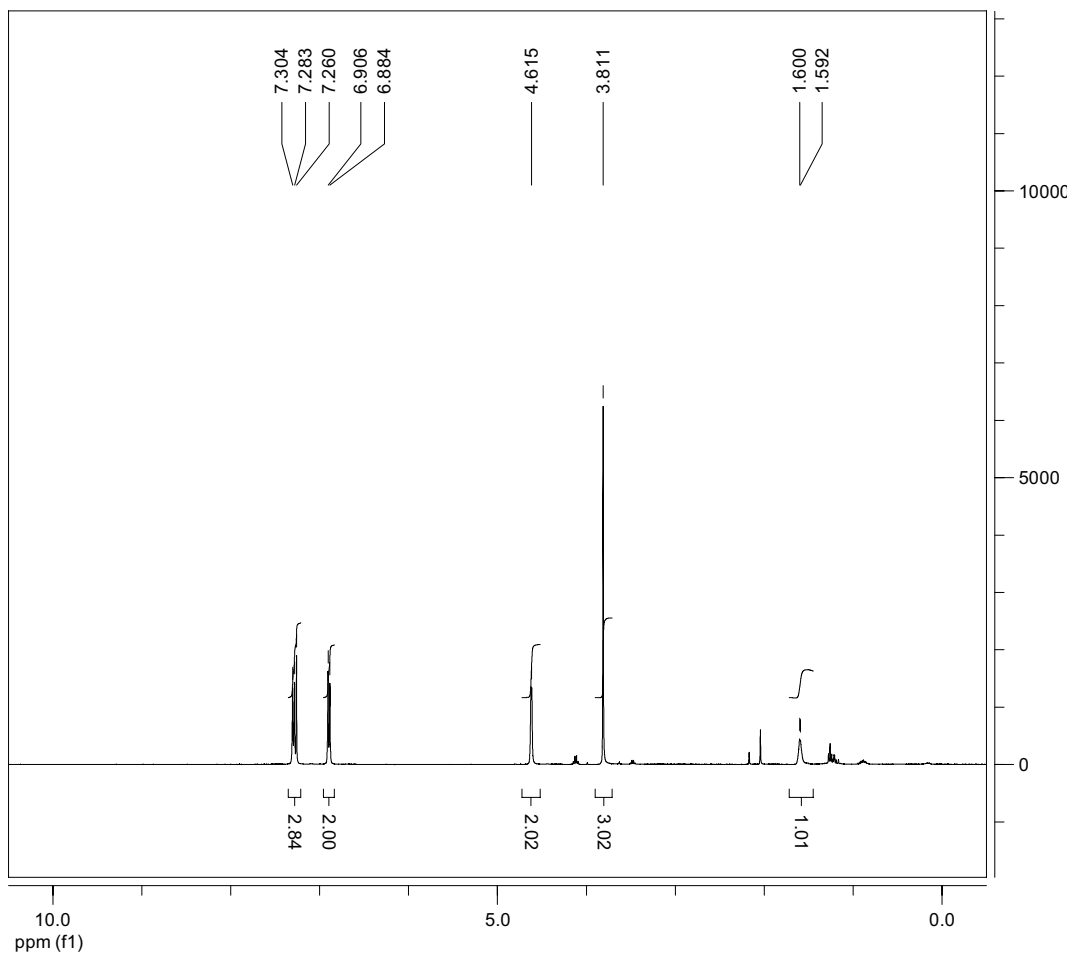

**Date:** 23 May 2012  
**Document's Title:** fid  
**Spectrum Title:**  
**Frequency (MHz):** (f1) 400.162  
**Original Points Count:** (f1) 32768  
**Actual Points Count:** (f1) 65536  
**Acquisition Time (sec):** (f1) 3.9846  
**Spectral Width (ppm):** (f1) 20.551  
**Pulse Program:** ZG30  
**Temperature:** 299.0745  
**Number of Scans:** 8  
**Acq. Date:** Thu Apr 19 05:01:42 PM

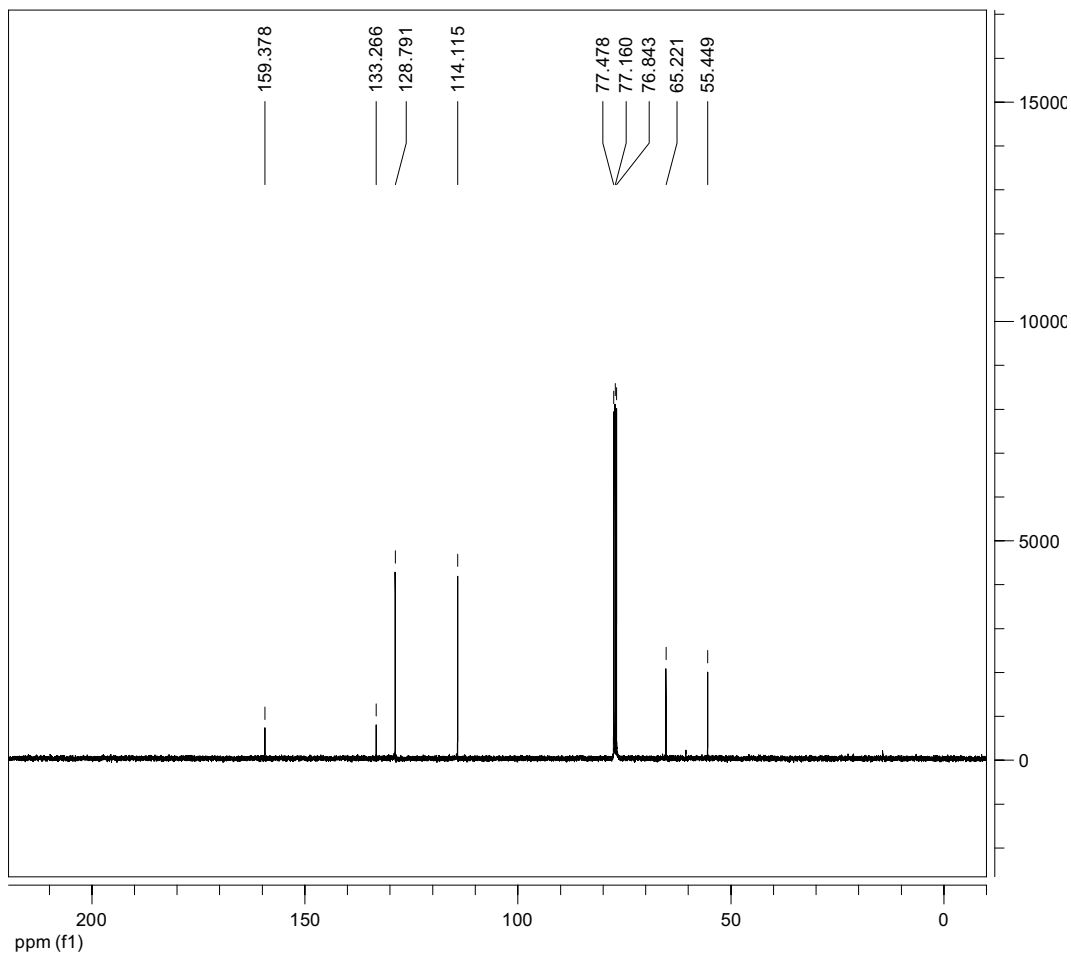

**Date:** 23 May 2012  
**Document's Title:** fid  
**Spectrum Title:**  
**Frequency (MHz):** (f1) 100.630  
**Original Points Count:** (f1) 32768  
**Actual Points Count:** (f1) 65536  
**Acquisition Time (sec):** (f1) 1.3631  
**Spectral Width (ppm):** (f1) 238.879  
**Pulse Program:** ZGPC30  
**Temperature:** 299.1216  
**Number of Scans:** 512  
**Acq. Date:** Fri Apr 20 07:09:31 AM

### 4-(*N,N*-Dimethylamino)phenylmethanol

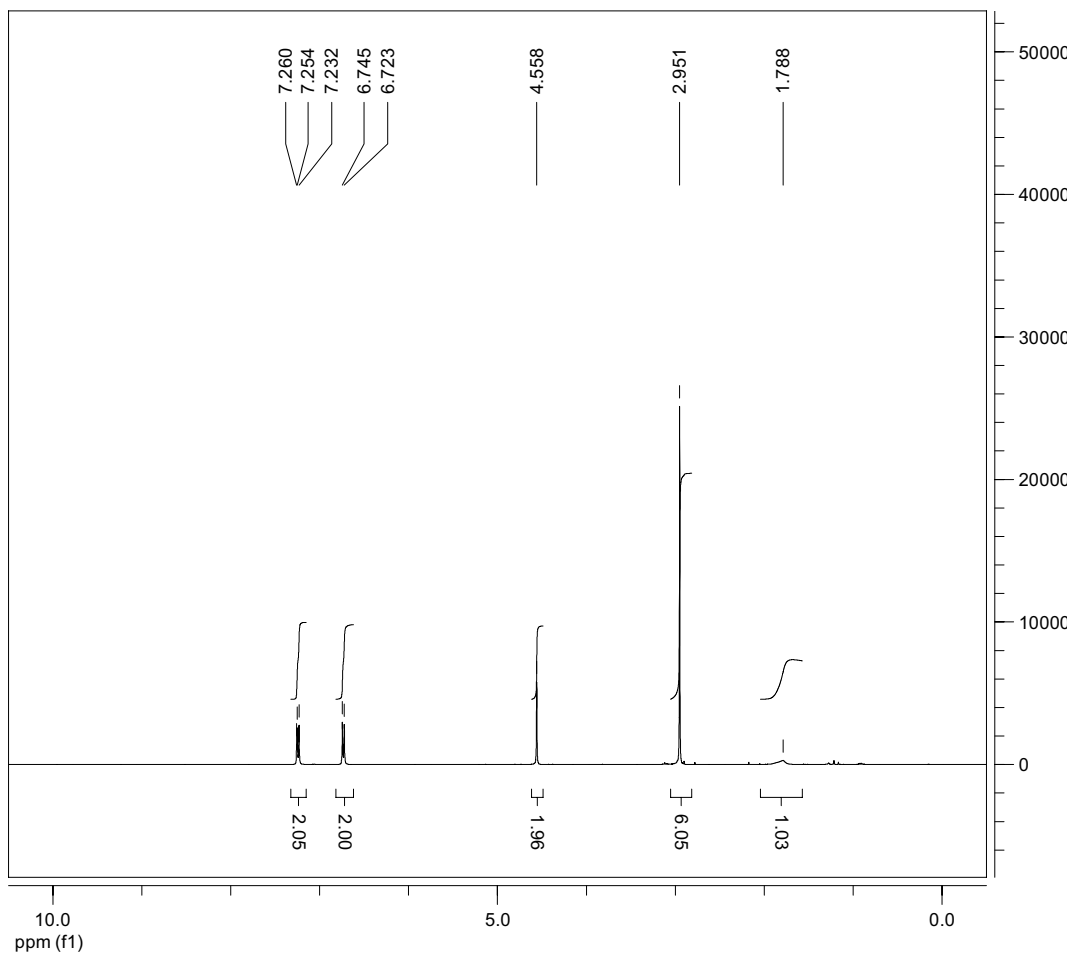

**Date:** 23 May 2012  
**Document's Title:** fid  
**Spectrum Title:**  
**Frequency (MHz):** (f1) 400.162  
**Original Points Count:** (f1) 32768  
**Actual Points Count:** (f1) 65536  
**Acquisition Time (sec):** (f1) 3.9846  
**Spectral Width (ppm):** (f1) 20.551  
**Pulse Program:** ZG30  
**Temperature:** 299.1124  
**Number of Scans:** 8  
**Acq. Date:** Wed May 23 12:40:38 AM

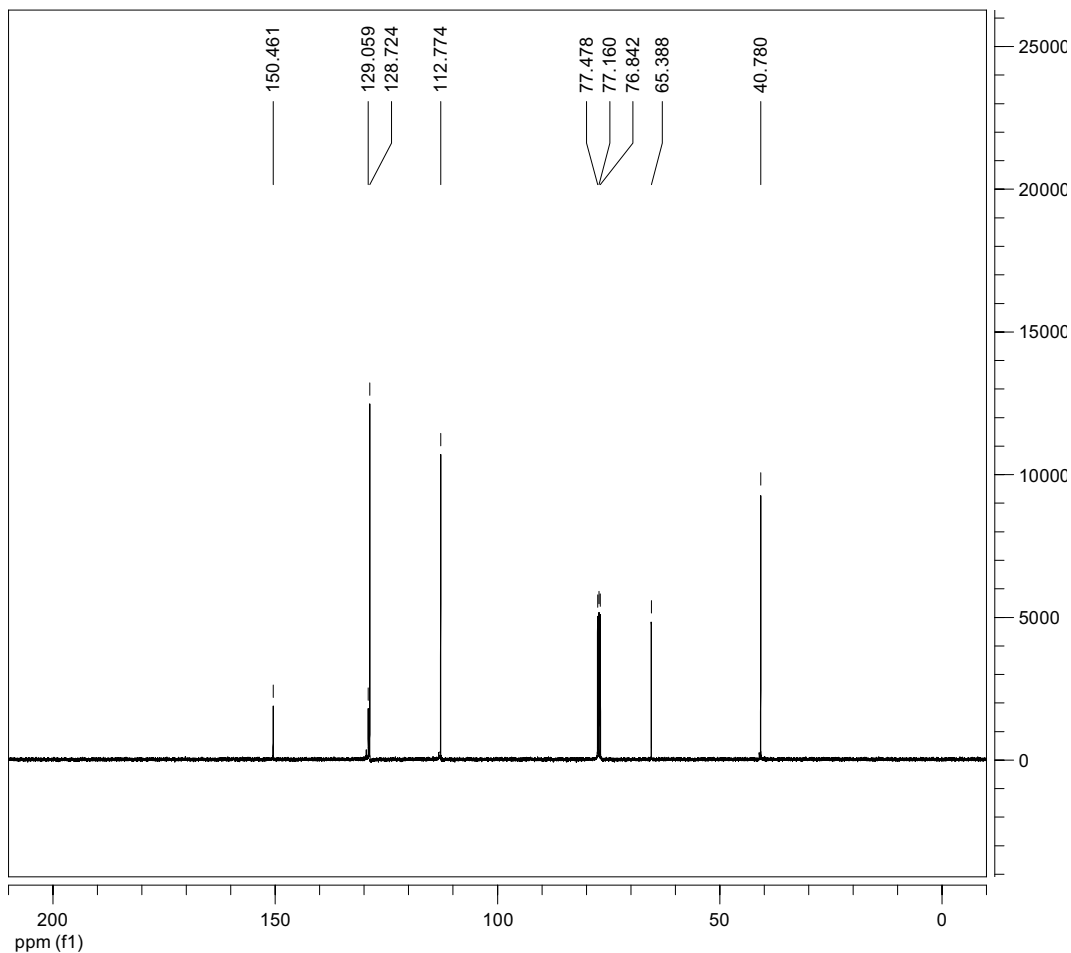

**Date:** 26 May 2012  
**Document's Title:** fid  
**Spectrum Title:**  
**Frequency (MHz):** (f1) 100.630  
**Original Points Count:** (f1) 32768  
**Actual Points Count:** (f1) 65536  
**Acquisition Time (sec):** (f1) 1.3631  
**Spectral Width (ppm):** (f1) 238.879  
**Pulse Program:** ZGPC30  
**Temperature:** 299.1109  
**Number of Scans:** 300  
**Acq. Date:** Fri May 25 05:59:23 PM

### 4-Nitrobenzyl alcohol

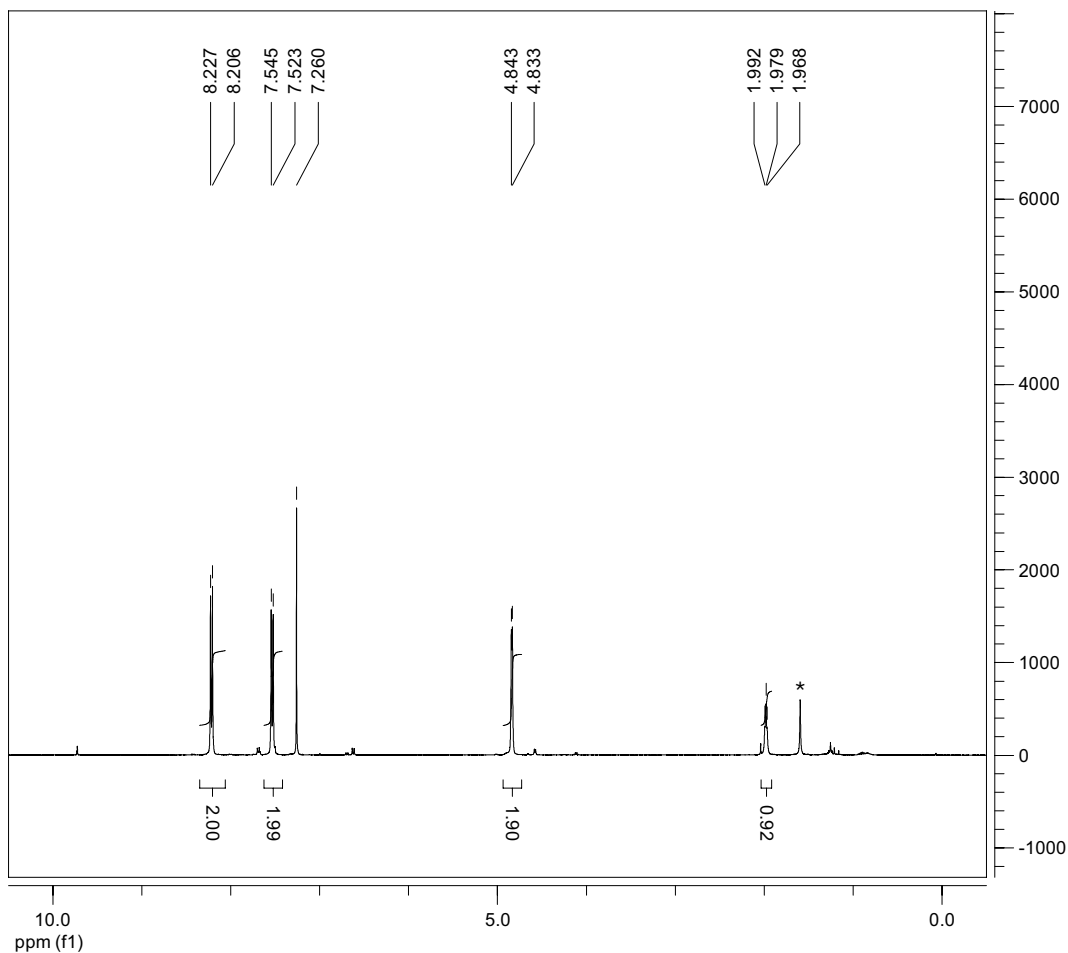

**Date:** 23 May 2012  
**Document's Title:** fid  
**Spectrum Title:**  
**Frequency (MHz):** (f1) 400.162  
**Original Points Count:** (f1) 32768  
**Actual Points Count:** (f1) 65536  
**Acquisition Time (sec):** (f1) 3.9846  
**Spectral Width (ppm):** (f1) 20.551  
**Pulse Program:** ZG30  
**Temperature:** 299.0938  
**Number of Scans:** 8  
**Acq. Date:** Mon May 07 05:39:21 PM

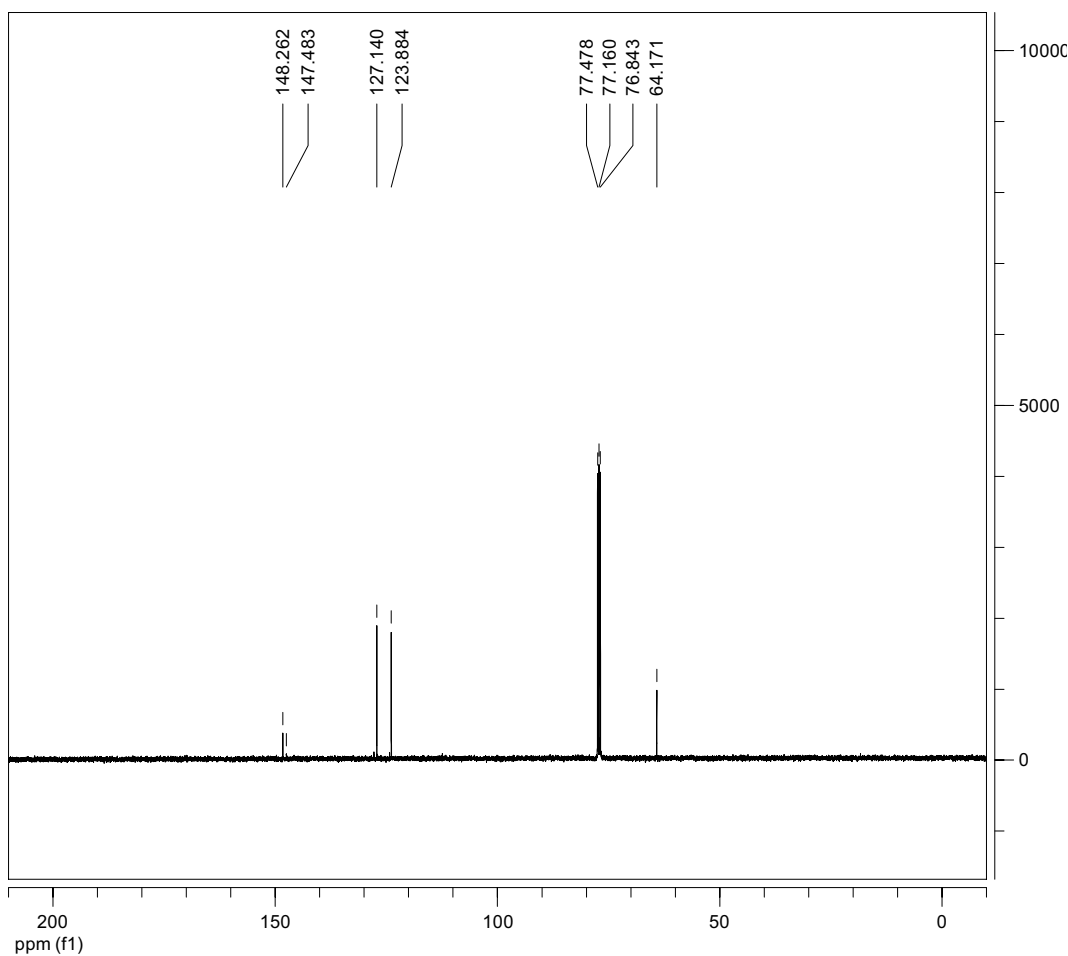

**Date:** 24 May 2012  
**Document's Title:** fid  
**Spectrum Title:**  
**Frequency (MHz):** (f1) 100.630  
**Original Points Count:** (f1) 32768  
**Actual Points Count:** (f1) 65536  
**Acquisition Time (sec):** (f1) 1.3631  
**Spectral Width (ppm):** (f1) 238.879  
**Pulse Program:** ZGPG30  
**Temperature:** 299.0838  
**Number of Scans:** 350  
**Acq. Date:** Tue May 08 08:32:50 AM

### Methyl 4-(hydroxymethyl)benzoate

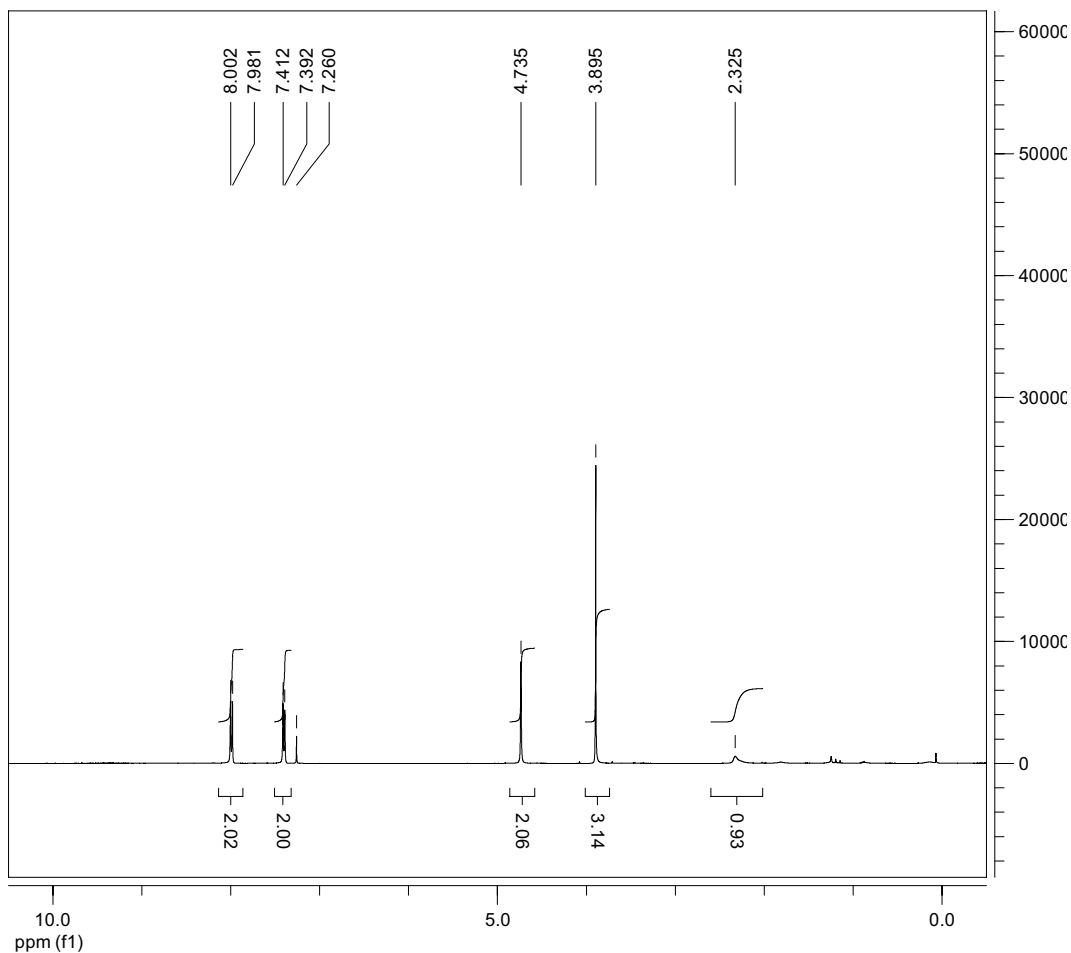

**Date:** 24 May 2012  
**Document's Title:** fid  
**Spectrum Title:**  
**Frequency (MHz):** (f1) 400.162  
**Original Points Count:** (f1) 32768  
**Actual Points Count:** (f1) 65536  
**Acquisition Time (sec):** (f1) 3.9846  
**Spectral Width (ppm):** (f1) 20.551  
**Pulse Program:** ZG30  
**Temperature:** 299.0908  
**Number of Scans:** 16  
**Acq. Date:** Mon May 14 04:08:19 PM

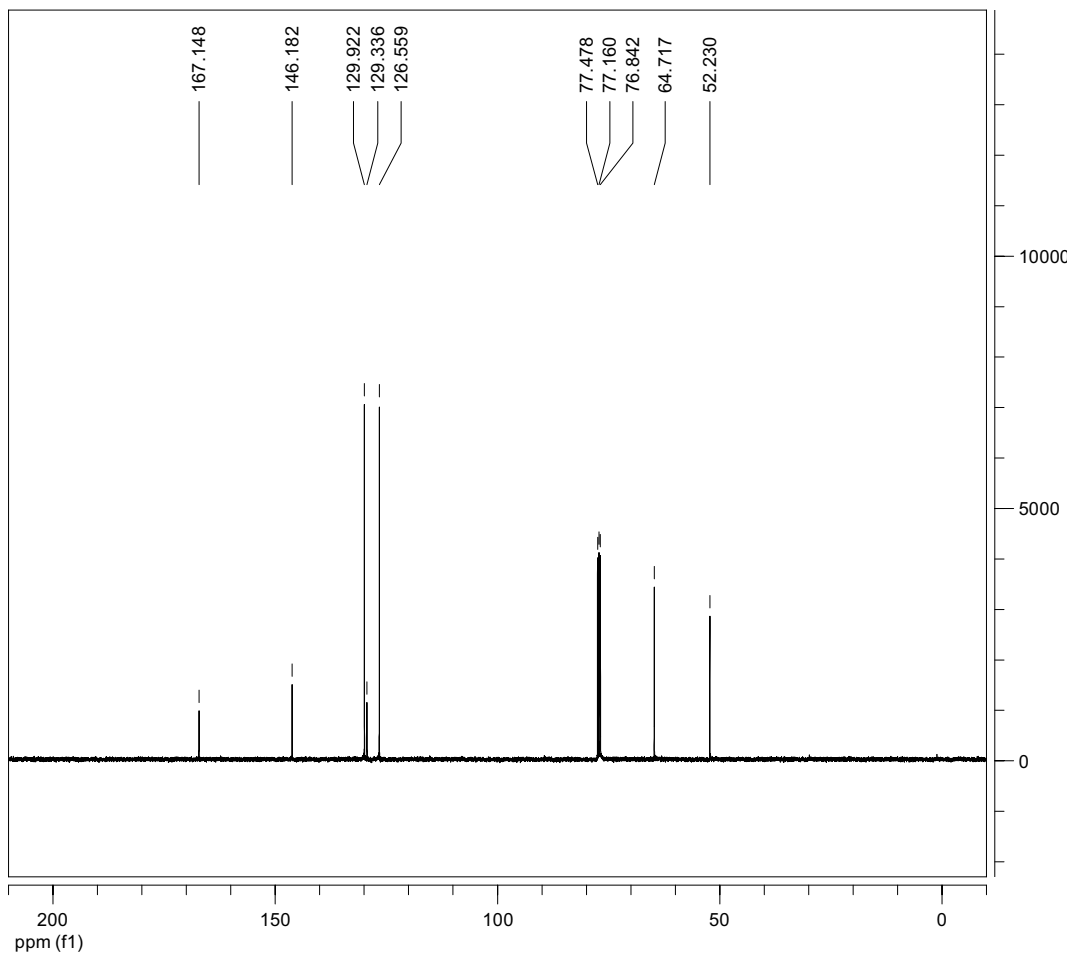

**Date:** 24 May 2012  
**Document's Title:** fid  
**Spectrum Title:**  
**Frequency (MHz):** (f1) 100.630  
**Original Points Count:** (f1) 32768  
**Actual Points Count:** (f1) 65536  
**Acquisition Time (sec):** (f1) 1.3631  
**Spectral Width (ppm):** (f1) 238.879  
**Pulse Program:** ZGPC30  
**Temperature:** 299.1265  
**Number of Scans:** 256  
**Acq. Date:** Tue May 15 08:00:35 AM



### N-(4-(Hydroxymethyl)phenyl)acetamide

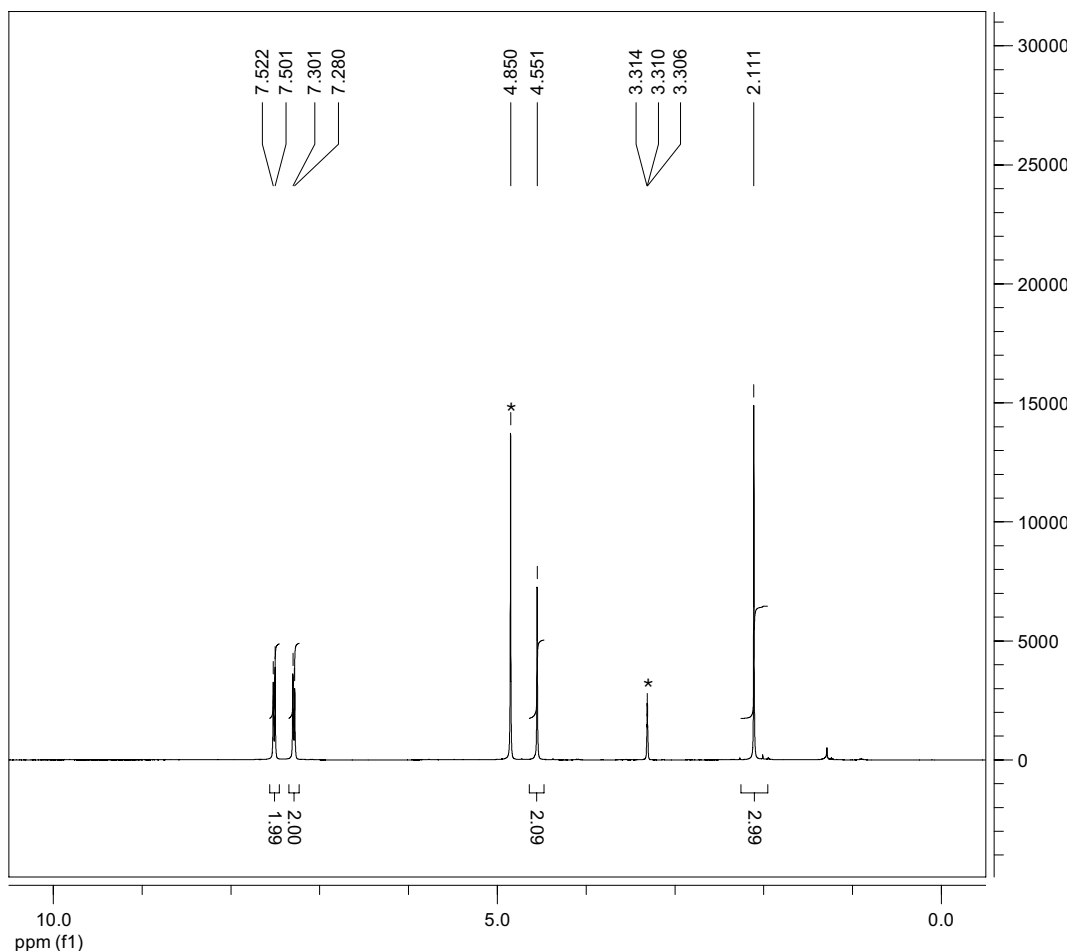

**Date:** 27 Jun 2012  
**Document's Title:** fid  
**Spectrum Title:**  
**Frequency (MHz):** (f1) 400.162  
**Original Points Count:** (f1) 32768  
**Actual Points Count:** (f1) 65536  
**Acquisition Time (sec):** (f1) 3.9846  
**Spectral Width (ppm):** (f1) 20.551  
**Pulse Program:** ZG30  
**Temperature:** 299.091  
**Number of Scans:** 16  
**Acq. Date:** Thu May 24 03:19:25 PM

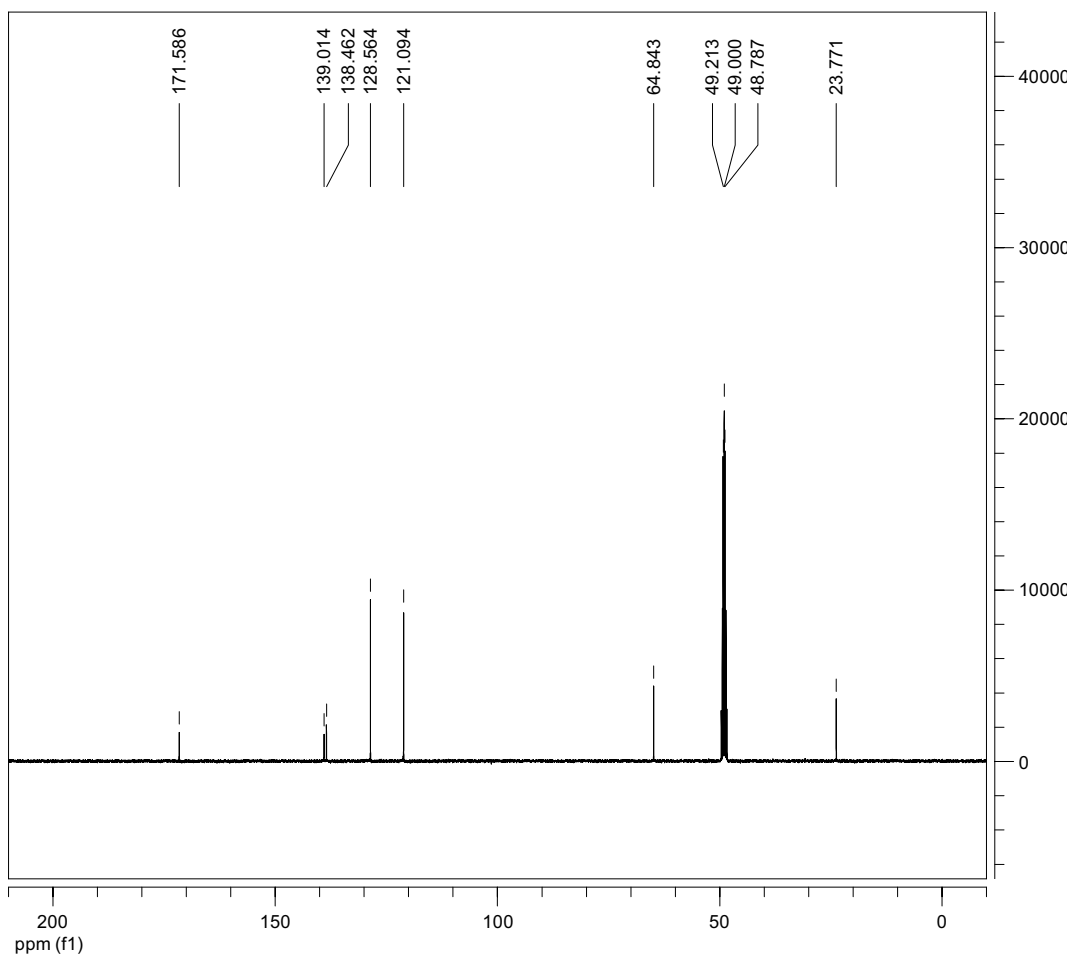

**Date:** 26 May 2012  
**Document's Title:** fid  
**Spectrum Title:**  
**Frequency (MHz):** (f1) 100.630  
**Original Points Count:** (f1) 32768  
**Actual Points Count:** (f1) 65536  
**Acquisition Time (sec):** (f1) 1.3631  
**Spectral Width (ppm):** (f1) 238.879  
**Pulse Program:** ZGPC30  
**Temperature:** 299.1182  
**Number of Scans:** 300  
**Acq. Date:** Fri May 25 07:11:39 PM

## 2-Tolylmethanol

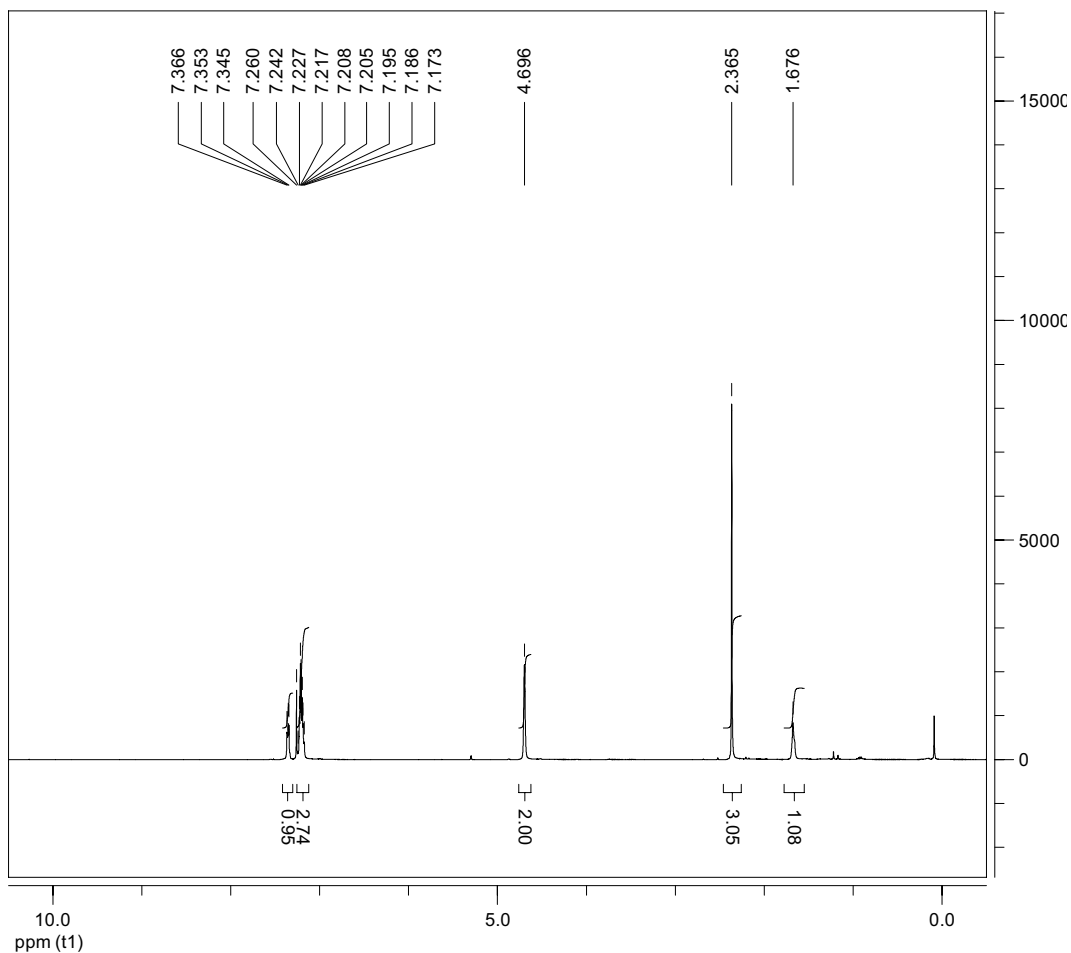

**Date:**  
22 May 2012  
**Document's Title:**  
fid  
**Spectrum Title:**  
  
**Frequency (MHz):**  
(f1) 400.162  
**Original Points Count:**  
(f1) 32768  
**Actual Points Count:**  
(f1) 65536  
**Acquisition Time (sec):**  
(f1) 3.9846  
**Spectral Width (ppm):**  
(f1) 20.551  
**Pulse Program:**  
ZG30  
**Temperature:**  
299.1267  
**Number of Scans:**  
8  
**Acq. Date:**  
Thu Apr 19 12:09:38 AM

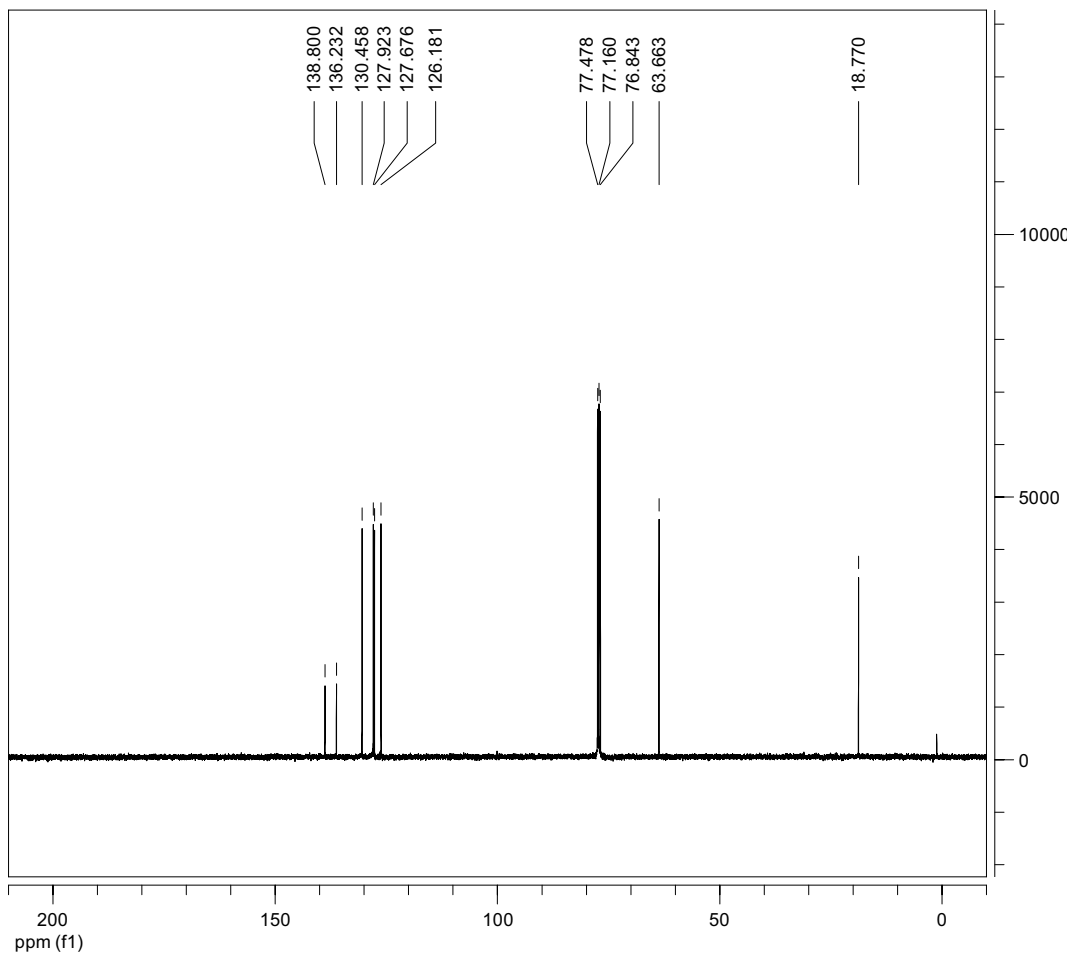

**Date:**  
23 May 2012  
**Document's Title:**  
fid  
**Spectrum Title:**  
  
**Frequency (MHz):**  
(f1) 100.630  
**Original Points Count:**  
(f1) 32768  
**Actual Points Count:**  
(f1) 65536  
**Acquisition Time (sec):**  
(f1) 1.3631  
**Spectral Width (ppm):**  
(f1) 238.879  
**Pulse Program:**  
ZGPC30  
**Temperature:**  
299.1189  
**Number of Scans:**  
512  
**Acq. Date:**  
Thu Apr 19 07:25:24 PM

## 2,6-Dimethylhept-5-en-1-ol

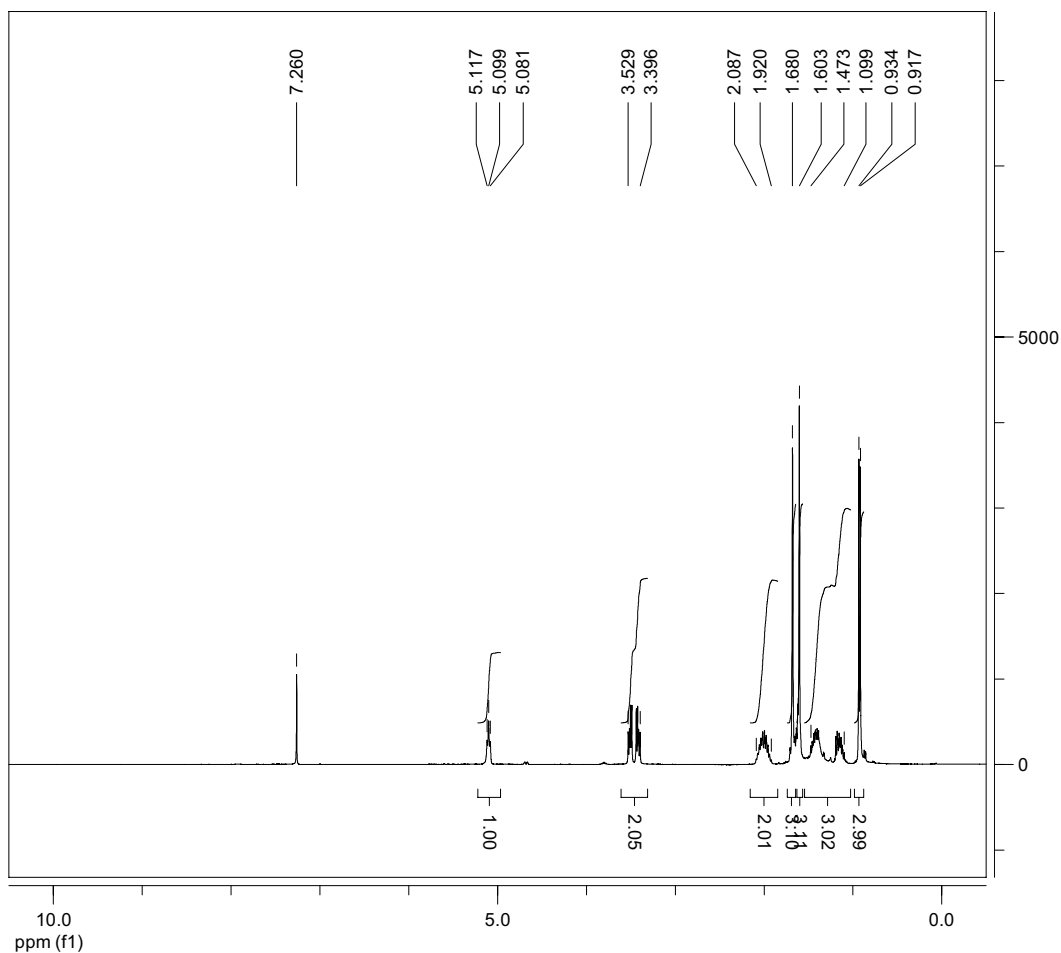

**Date:**  
27 Jun 2012  
**Document's Title:**  
fid  
**Spectrum Title:**  
**Frequency (MHz):**  
(f1) 400.162  
**Original Points Count:**  
(f1) 32768  
**Actual Points Count:**  
(f1) 65536  
**Acquisition Time (sec):**  
(f1) 3.9846  
**Spectral Width (ppm):**  
(f1) 20.551  
**Pulse Program:**  
ZG30  
**Temperature:**  
299.1128  
**Number of Scans:**  
8  
**Acq. Date:**  
Mon May 14 08:52:45 AM

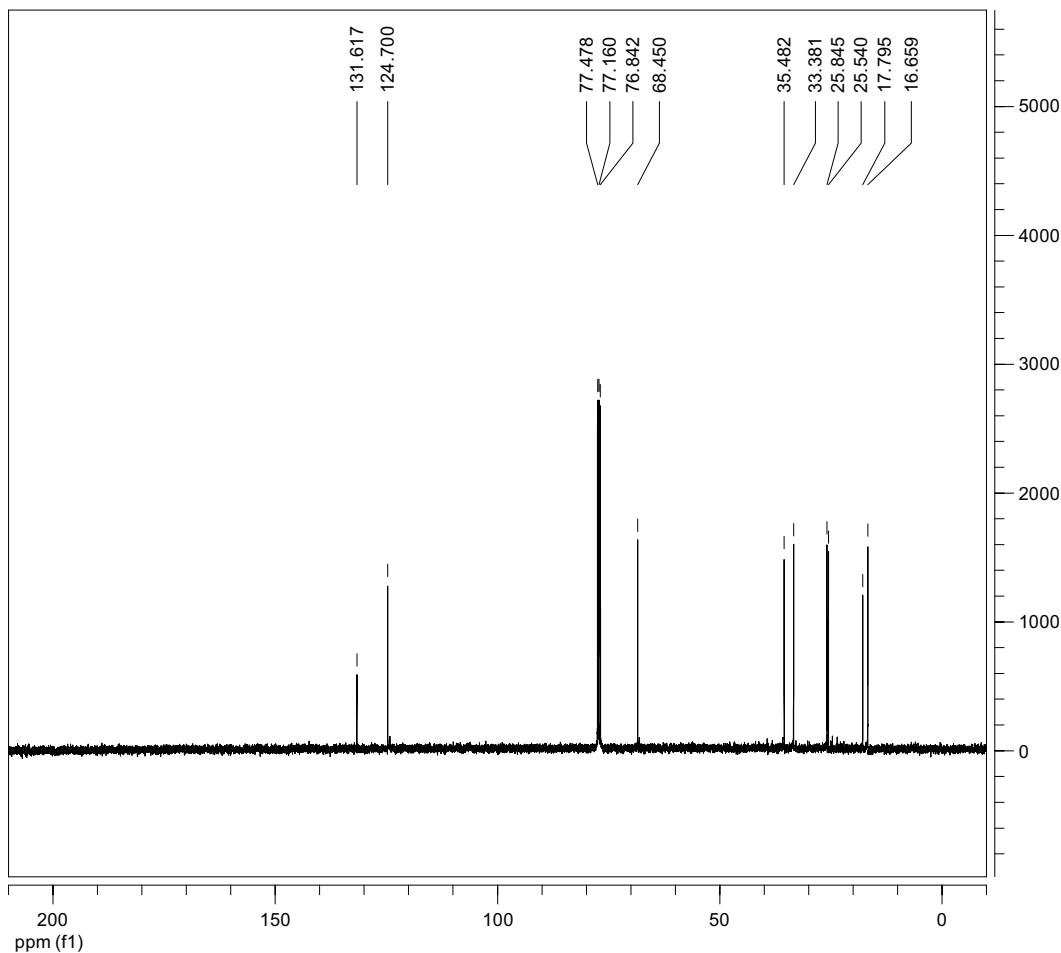

**Date:**  
24 May 2012  
**Document's Title:**  
fid  
**Spectrum Title:**  
**Frequency (MHz):**  
(f1) 100.630  
**Original Points Count:**  
(f1) 32768  
**Actual Points Count:**  
(f1) 65536  
**Acquisition Time (sec):**  
(f1) 1.3631  
**Spectral Width (ppm):**  
(f1) 238.879  
**Pulse Program:**  
ZGPC30  
**Temperature:**  
299.1184  
**Number of Scans:**  
180  
**Acq. Date:**  
Tue May 15 08:15:38 AM

### Furan-2-ylmethanol

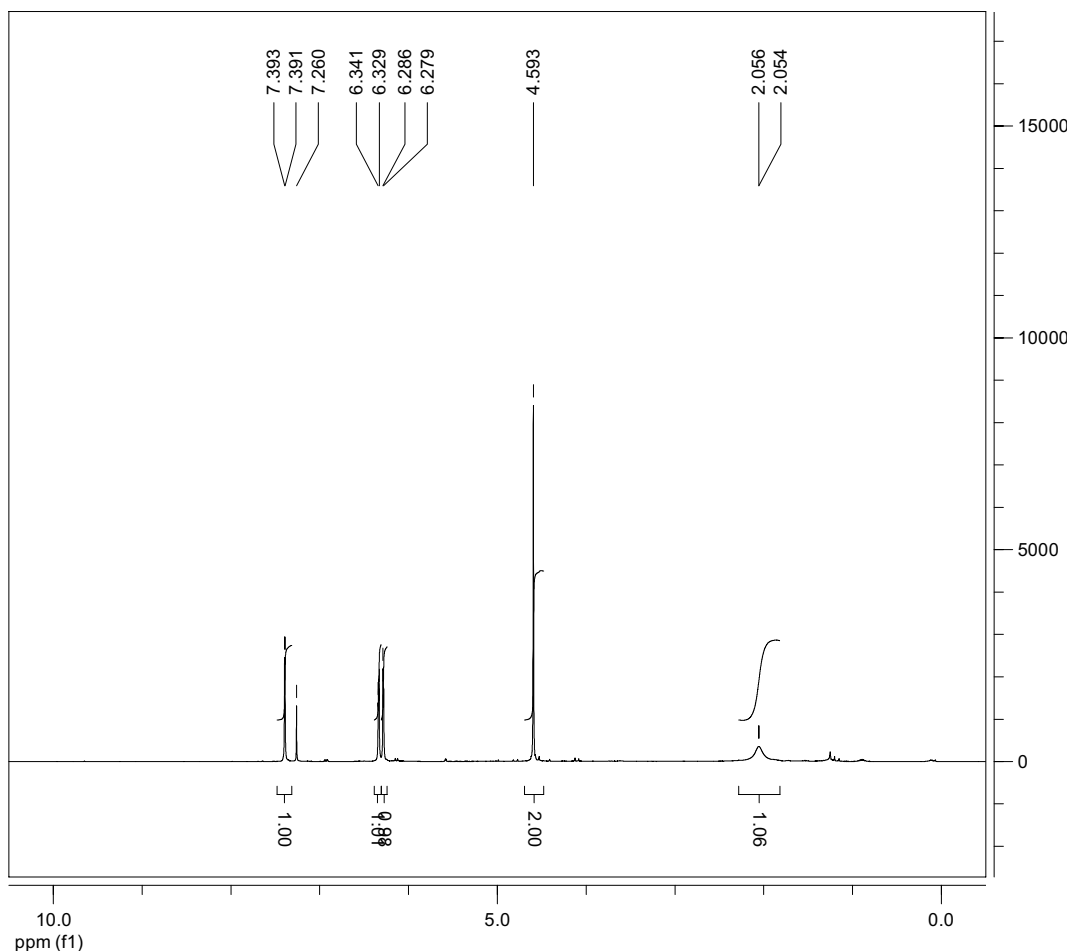

**Date:** 27 Jun 2012  
**Document's Title:** fid  
**Spectrum Title:**  
**Frequency (MHz):** (f1) 400.162  
**Original Points Count:** (f1) 32768  
**Actual Points Count:** (f1) 65536  
**Acquisition Time (sec):** (f1) 3.9846  
**Spectral Width (ppm):** (f1) 20.551  
**Pulse Program:** ZG30  
**Temperature:** 299.1239  
**Number of Scans:** 8  
**Acq. Date:** Wed May 02 06:06:44 PM

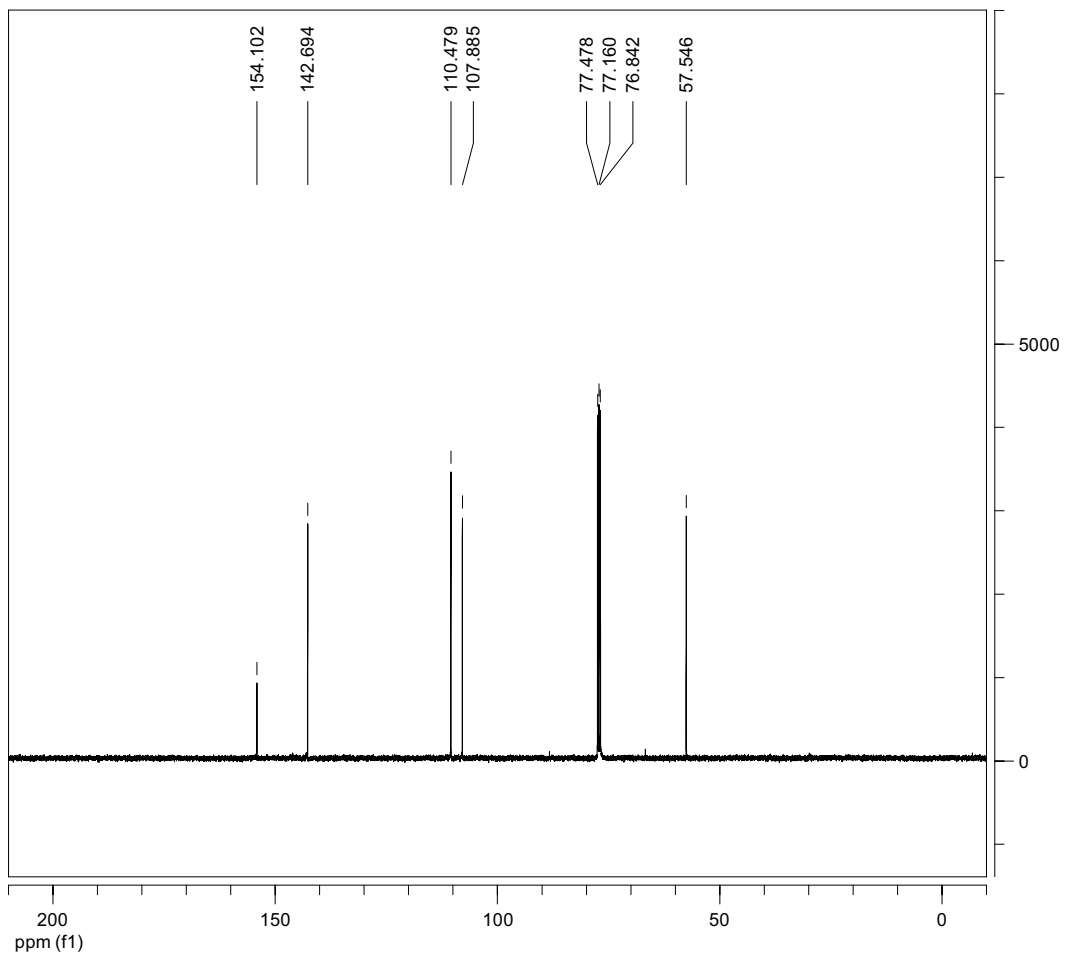

**Date:** 24 May 2012  
**Document's Title:** fid  
**Spectrum Title:**  
**Frequency (MHz):** (f1) 100.630  
**Original Points Count:** (f1) 32768  
**Actual Points Count:** (f1) 65536  
**Acquisition Time (sec):** (f1) 1.3631  
**Spectral Width (ppm):** (f1) 238.879  
**Pulse Program:** ZGPC30  
**Temperature:** 299.0733  
**Number of Scans:** 512  
**Acq. Date:** Wed May 02 06:38:55 PM

### (1-Methyl-1H-pyrrol-2-yl)methanol

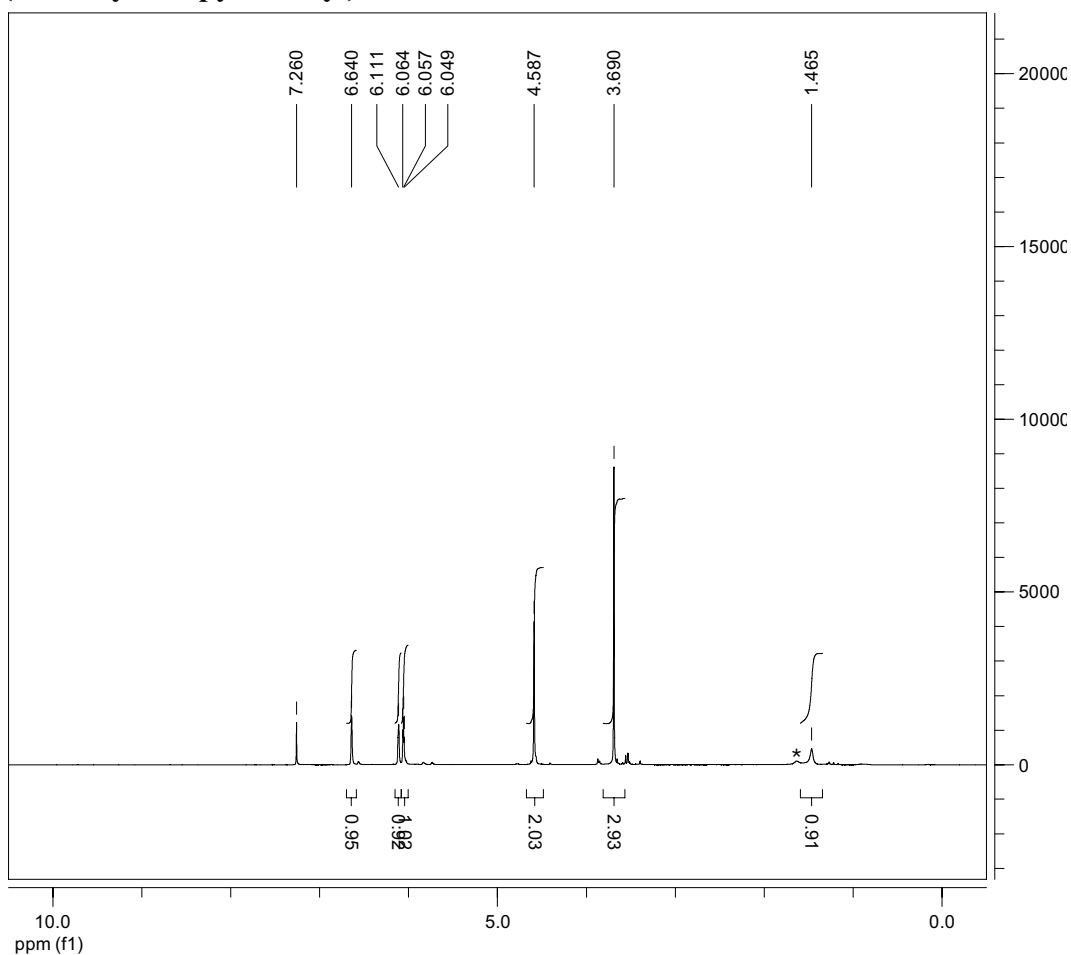

**Date:** 24 May 2012  
**Document's Title:** fid  
**Spectrum Title:**  
**Frequency (MHz):** (f1) 400.162  
**Original Points Count:** (f1) 32768  
**Actual Points Count:** (f1) 65536  
**Acquisition Time (sec):** (f1) 3.9846  
**Spectral Width (ppm):** (f1) 20.551  
**Pulse Program:** ZG30  
**Temperature:** 299.1191  
**Number of Scans:** 8  
**Acq. Date:** Tue May 08 12:33:40 AM

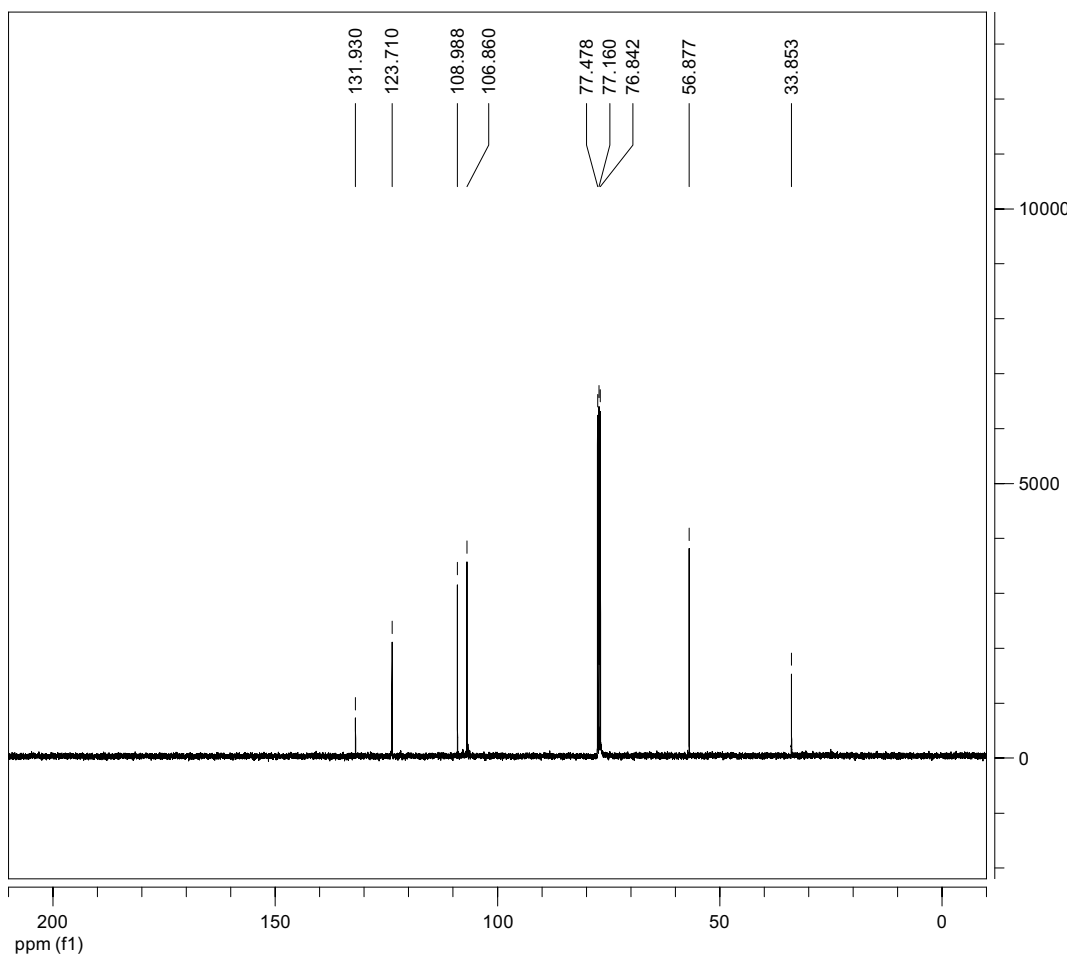

**Date:** 24 May 2012  
**Document's Title:** fid  
**Spectrum Title:**  
**Frequency (MHz):** (f1) 100.630  
**Original Points Count:** (f1) 32768  
**Actual Points Count:** (f1) 65536  
**Acquisition Time (sec):** (f1) 1.3631  
**Spectral Width (ppm):** (f1) 238.879  
**Pulse Program:** ZGPC30  
**Temperature:** 299.1191  
**Number of Scans:** 350  
**Acq. Date:** Tue May 08 01:21:03 PM

### Ferrocenemethanol

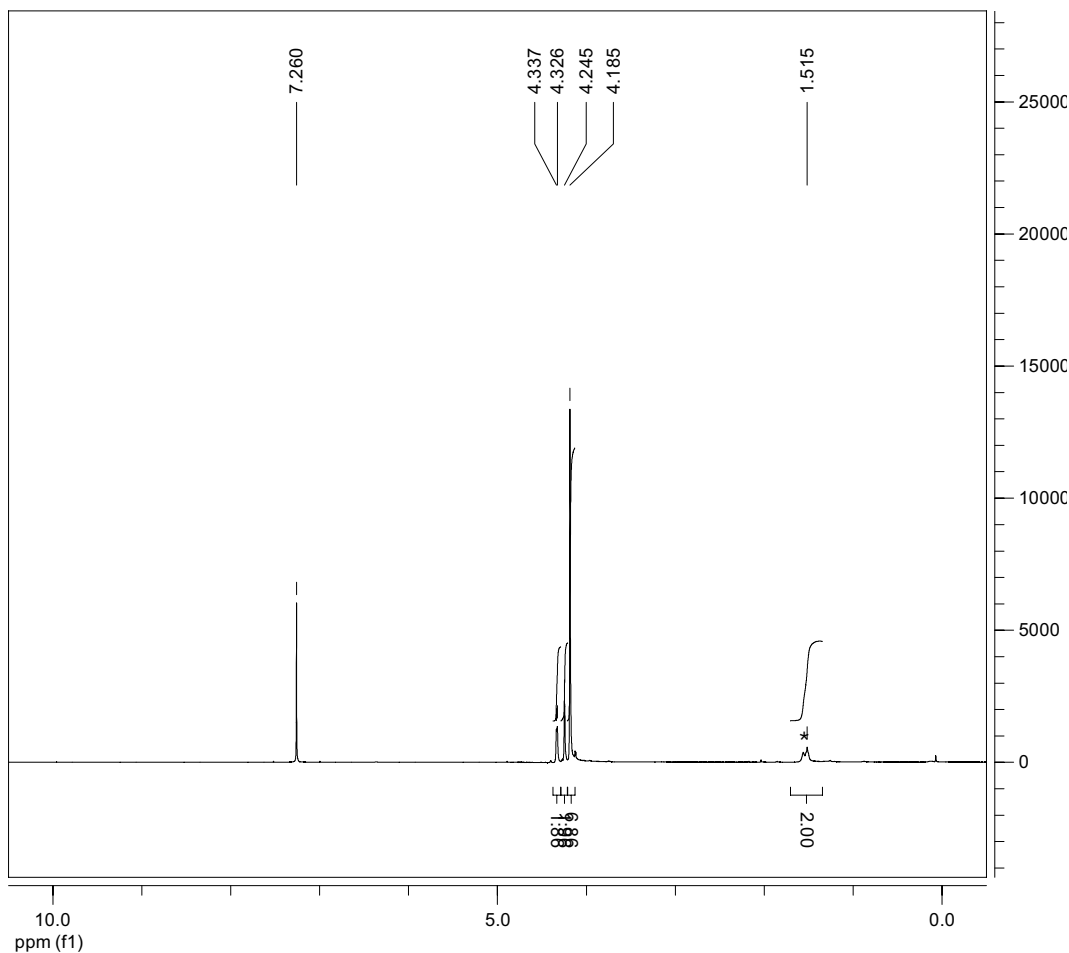

**Date:**  
24 May 2012  
**Document's Title:**  
fid  
**Spectrum Title:**  
  
**Frequency (MHz):**  
(f1) 400.162  
**Original Points Count:**  
(f1) 32768  
**Actual Points Count:**  
(f1) 65536  
**Acquisition Time (sec):**  
(f1) 3.9846  
**Spectral Width (ppm):**  
(f1) 20.551  
**Pulse Program:**  
ZG30  
**Temperature:**  
299.1216  
**Number of Scans:**  
16  
**Acq. Date:**  
Wed Apr 25 04:54:52 PM

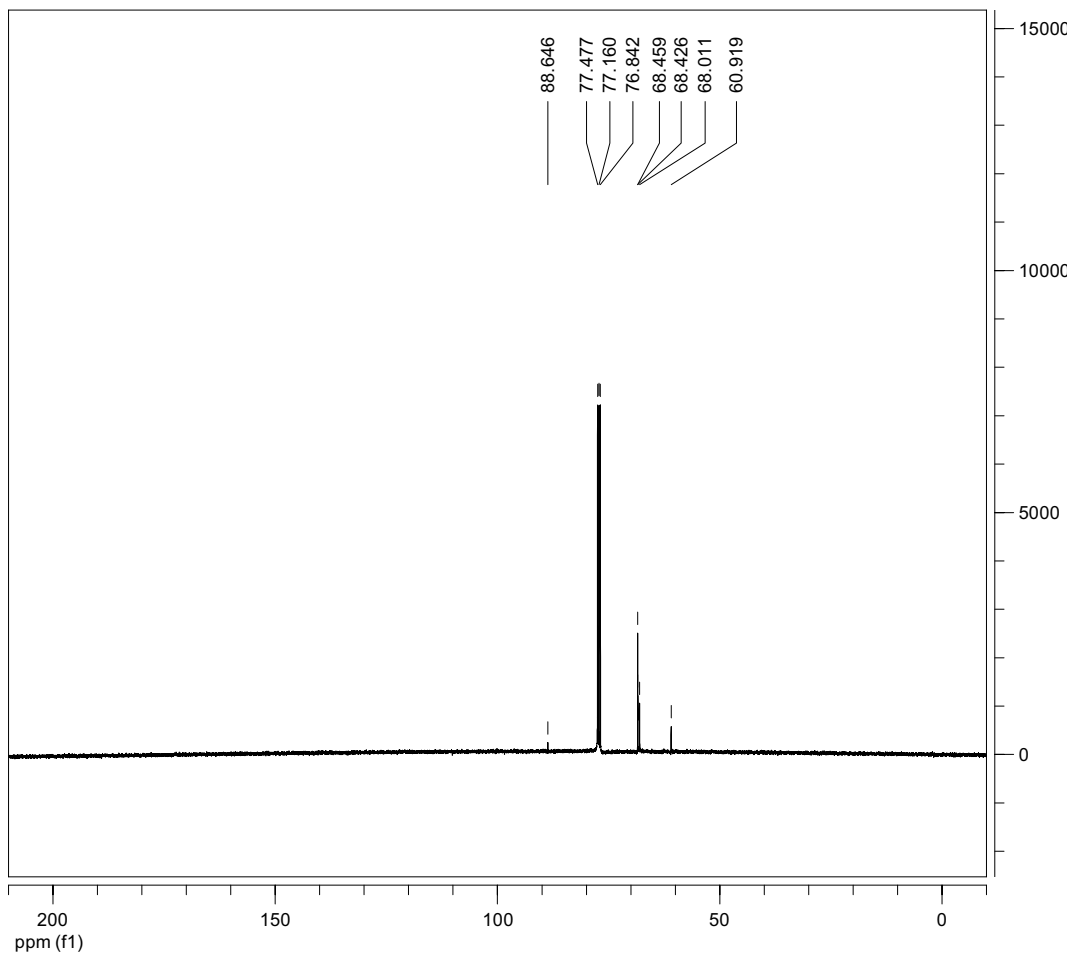

**Date:**  
24 May 2012  
**Document's Title:**  
fid  
**Spectrum Title:**  
  
**Frequency (MHz):**  
(f1) 100.631  
**Original Points Count:**  
(f1) 32768  
**Actual Points Count:**  
(f1) 65536  
**Acquisition Time (sec):**  
(f1) 1.2583  
**Spectral Width (ppm):**  
(f1) 258.783  
**Pulse Program:**  
ZGPC30  
**Temperature:**  
299.116  
**Number of Scans:**  
1024  
**Acq. Date:**  
Thu Apr 26 12:38:47 AM

# 1-Phenylethanol

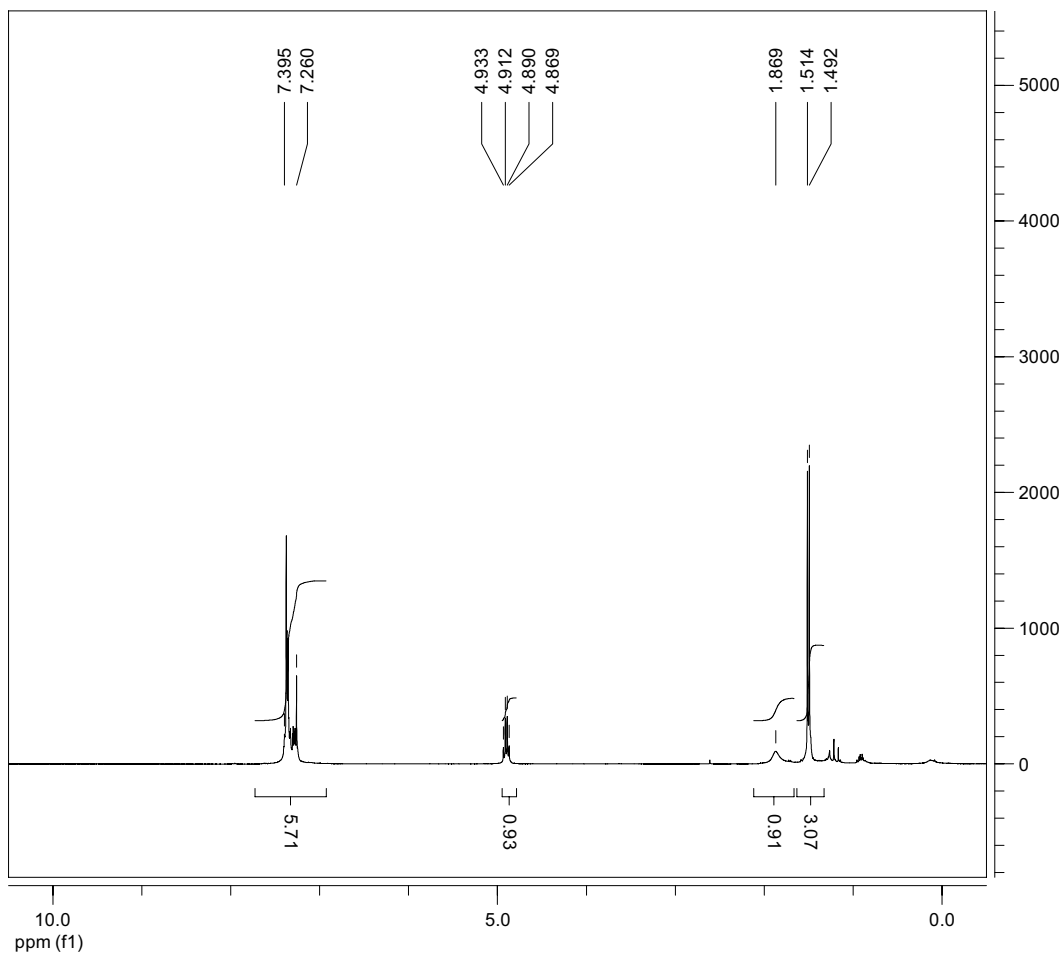

**Date:** 24 May 2012  
**Document's Title:** fid  
**Spectrum Title:** CDZJX615  
**Frequency (MHz):** (f1) 300.132  
**Original Points Count:** (f1) 16384  
**Actual Points Count:** (f1) 32768  
**Acquisition Time (sec):** (f1) 2.6542  
**Spectral Width (ppm):** (f1) 20.567  
**Pulse Program:** ZG30  
**Temperature:** 296.0144  
**Number of Scans:** 8  
**Acq. Date:** Wed Apr 25 12:28:31 AM

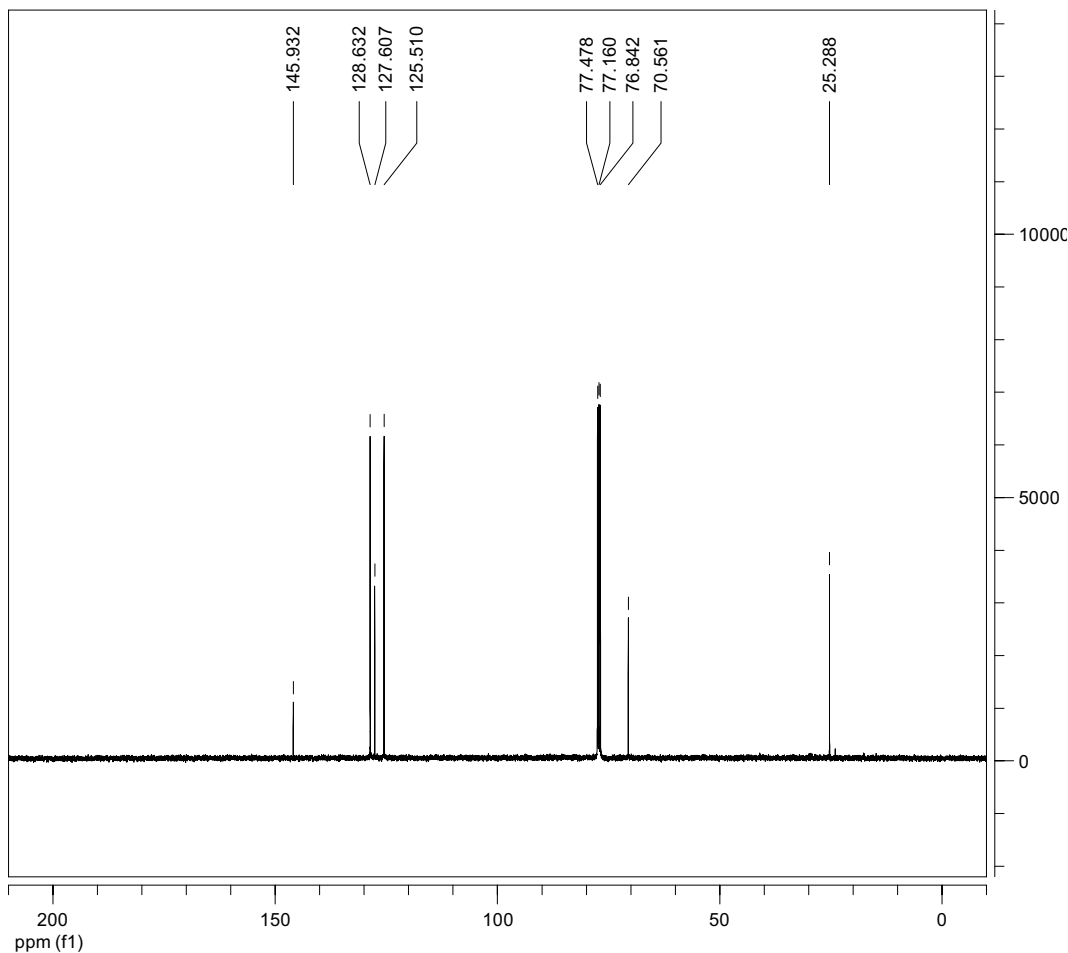

**Date:** 24 May 2012  
**Document's Title:** fid  
**Spectrum Title:**  
**Frequency (MHz):** (f1) 100.630  
**Original Points Count:** (f1) 32768  
**Actual Points Count:** (f1) 65536  
**Acquisition Time (sec):** (f1) 1.3631  
**Spectral Width (ppm):** (f1) 238.879  
**Pulse Program:** ZGPC30  
**Temperature:** 299.1201  
**Number of Scans:** 512  
**Acq. Date:** Wed Apr 25 06:49:32 PM

### 1-(4'-Methylphenyl)ethanol

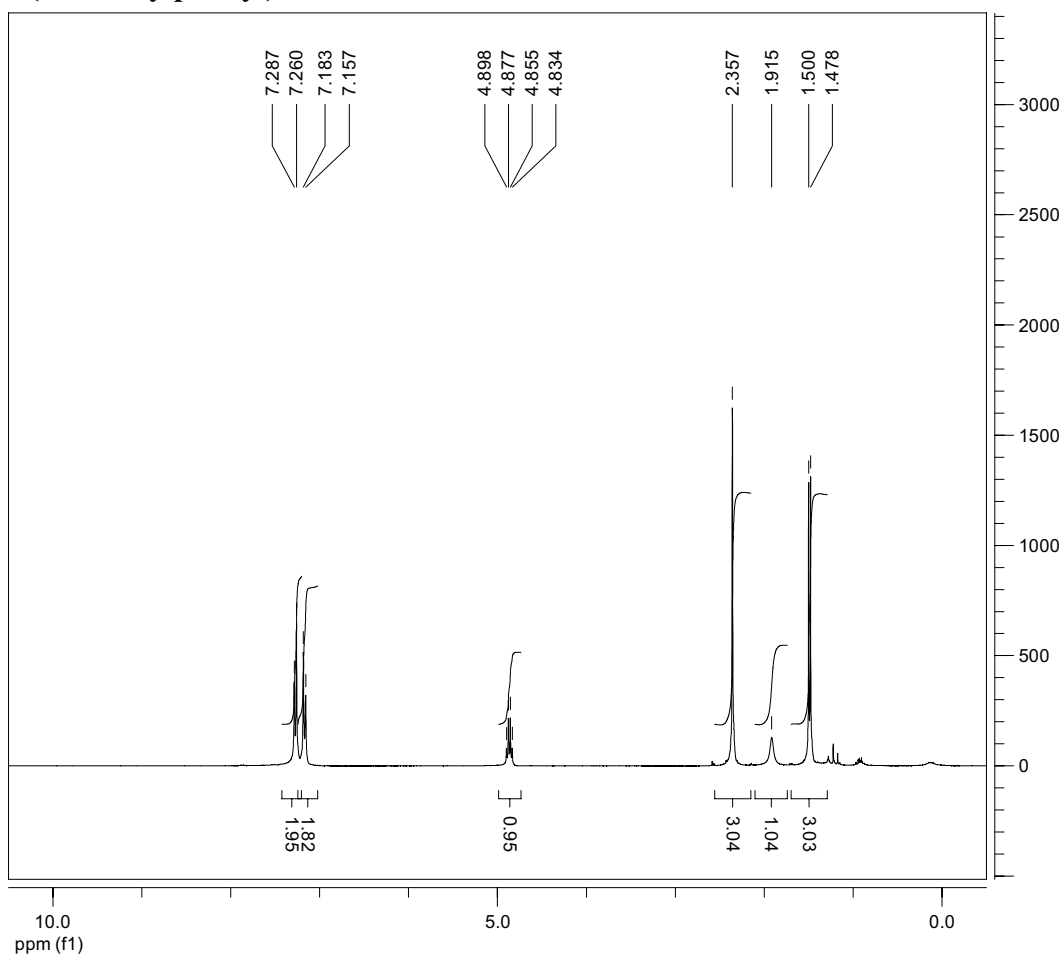

**Date:** 27 May 2012  
**Document's Title:** fid  
**Spectrum Title:** CDZJX617  
**Frequency (MHz):** (f1) 300.132  
**Original Points Count:** (f1) 16384  
**Actual Points Count:** (f1) 32768  
**Acquisition Time (sec):** (f1) 2.6542  
**Spectral Width (ppm):** (f1) 20.567  
**Pulse Program:** ZG30  
**Temperature:** 296.0144  
**Number of Scans:** 8  
**Acq. Date:** Wed Apr 25 12:31:34 AM

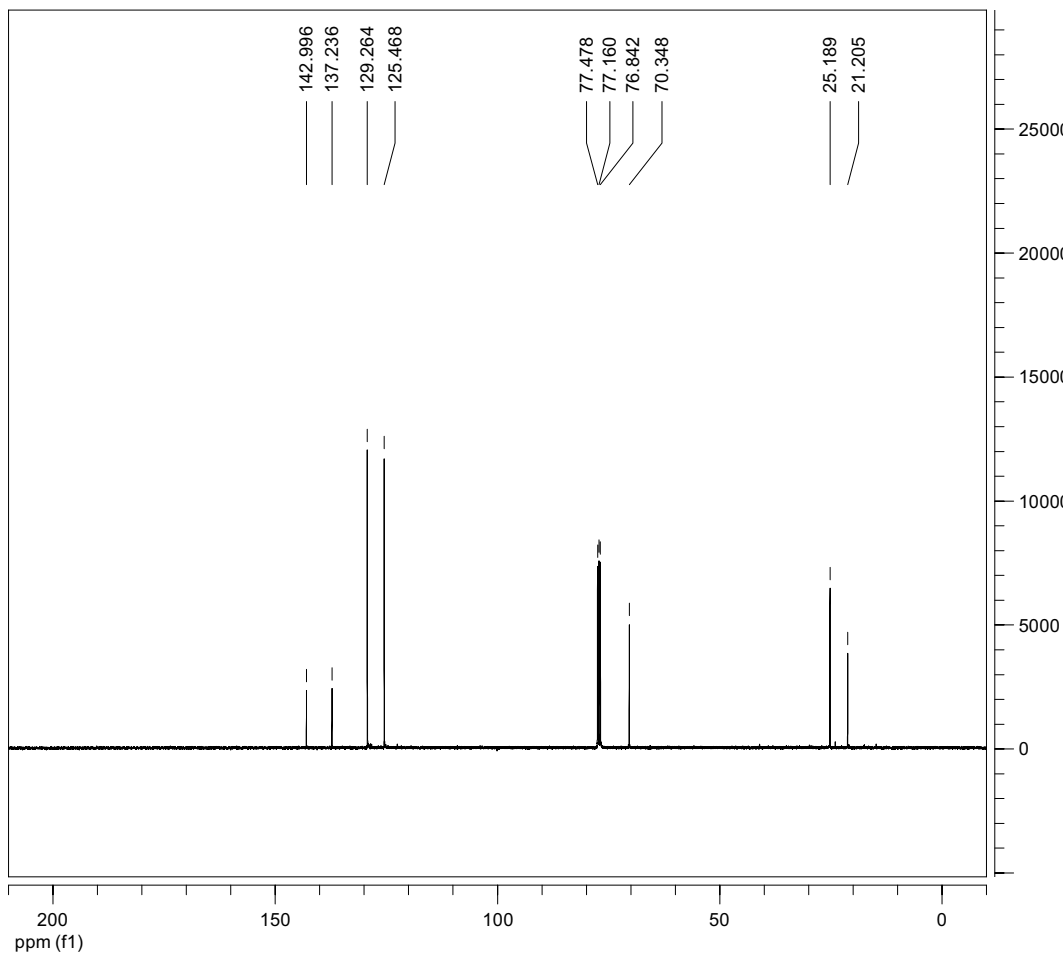

**Date:** 27 May 2012  
**Document's Title:** fid  
**Spectrum Title:**  
**Frequency (MHz):** (f1) 100.630  
**Original Points Count:** (f1) 32768  
**Actual Points Count:** (f1) 65536  
**Acquisition Time (sec):** (f1) 1.3631  
**Spectral Width (ppm):** (f1) 238.879  
**Pulse Program:** ZGPC30  
**Temperature:** 299.1256  
**Number of Scans:** 512  
**Acq. Date:** Wed Apr 25 07:23:37 PM



### 1-(4'-Methoxyphenyl)ethanol

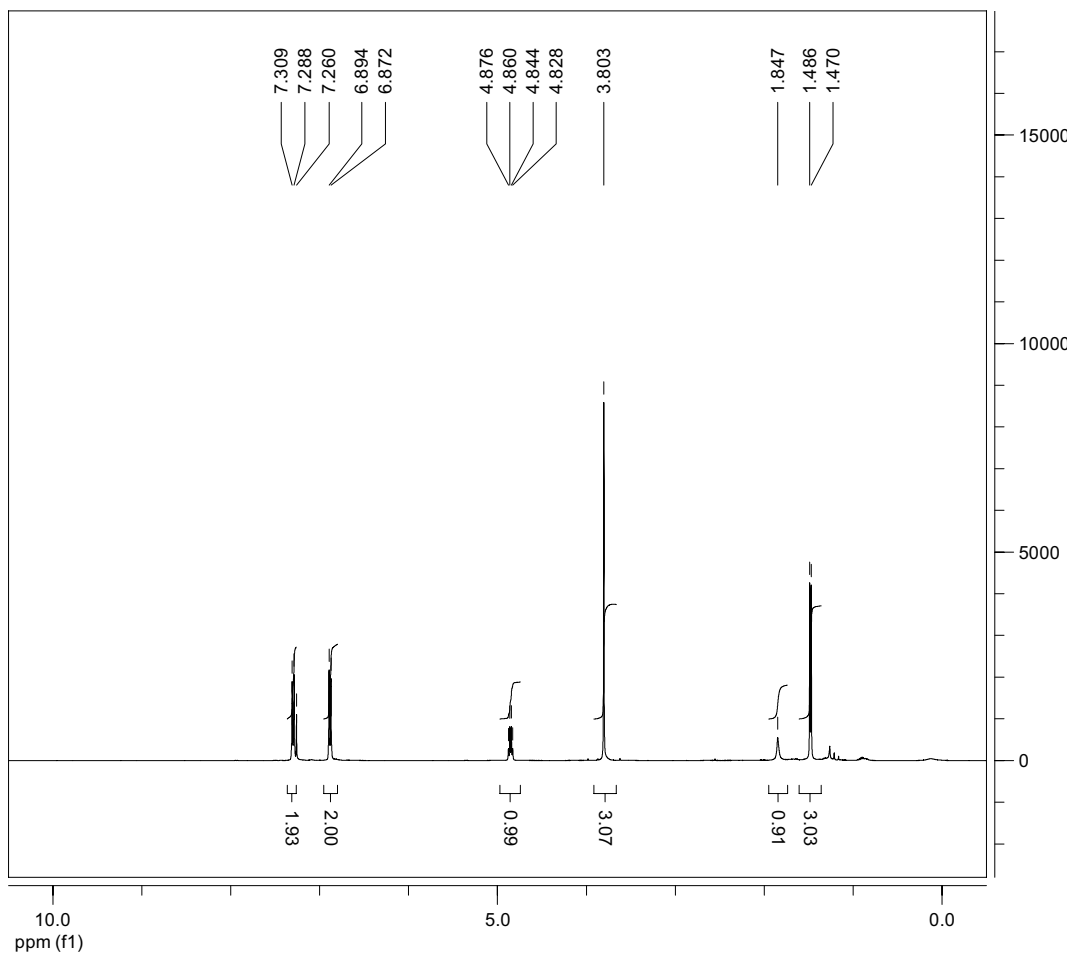

**Date:** 24 May 2012  
**Document's Title:** fid  
**Spectrum Title:**  
**Frequency (MHz):** (f1) 400.162  
**Original Points Count:** (f1) 32768  
**Actual Points Count:** (f1) 65536  
**Acquisition Time (sec):** (f1) 3.9846  
**Spectral Width (ppm):** (f1) 20.551  
**Pulse Program:** ZG30  
**Temperature:** 299.1176  
**Number of Scans:** 8  
**Acq. Date:** Wed Apr 25 11:02:15 PM

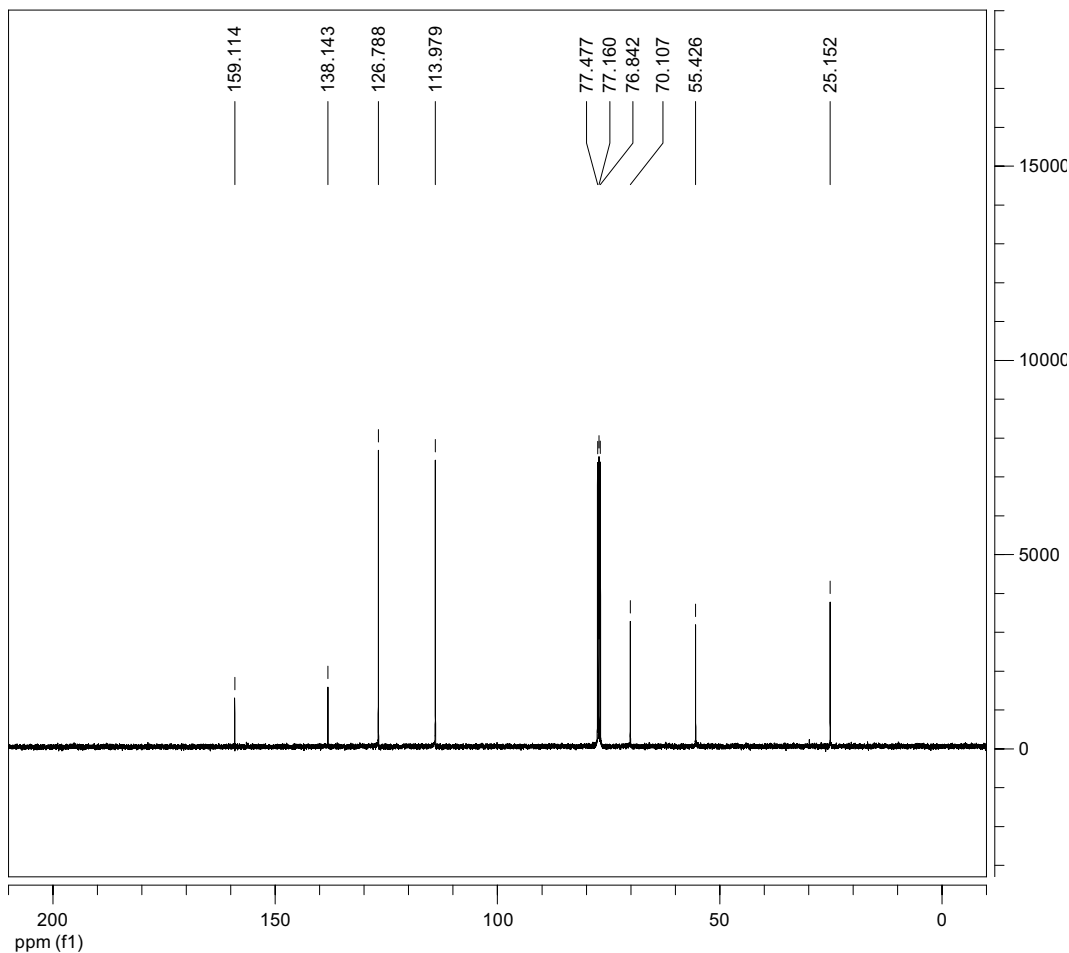

**Date:** 24 May 2012  
**Document's Title:** fid  
**Spectrum Title:**  
**Frequency (MHz):** (f1) 100.630  
**Original Points Count:** (f1) 32768  
**Actual Points Count:** (f1) 65536  
**Acquisition Time (sec):** (f1) 1.3631  
**Spectral Width (ppm):** (f1) 238.879  
**Pulse Program:** ZGPC30  
**Temperature:** 299.1172  
**Number of Scans:** 512  
**Acq. Date:** Wed Apr 25 11:33:03 PM

### 1-(4'-Fluorophenyl)ethanol

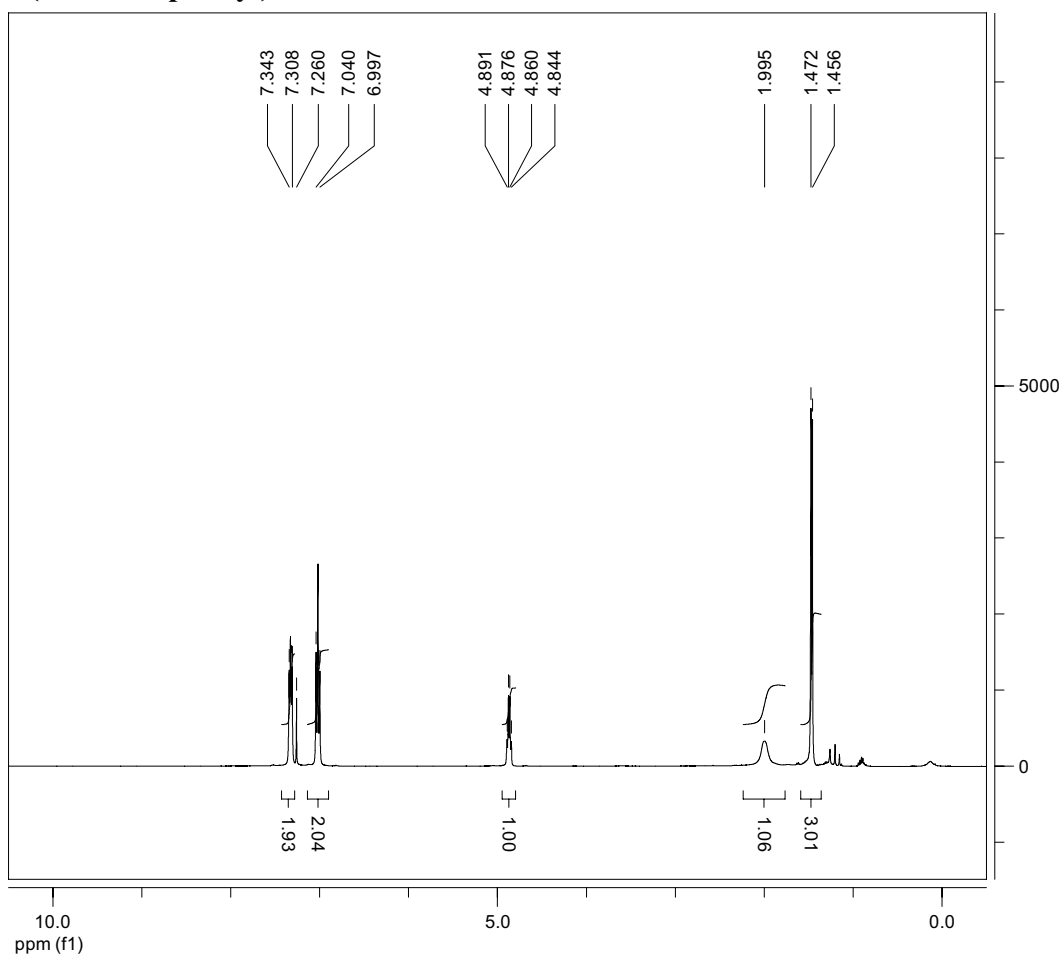

**Date:** 27 May 2012  
**Document's Title:** fid  
**Spectrum Title:**  
**Frequency (MHz):** (f1) 400.162  
**Original Points Count:** (f1) 32768  
**Actual Points Count:** (f1) 65536  
**Acquisition Time (sec):** (f1) 3.9846  
**Spectral Width (ppm):** (f1) 20.551  
**Pulse Program:** ZG30  
**Temperature:** 299.1197  
**Number of Scans:** 8  
**Acq. Date:** Mon May 21 10:02:32 AM

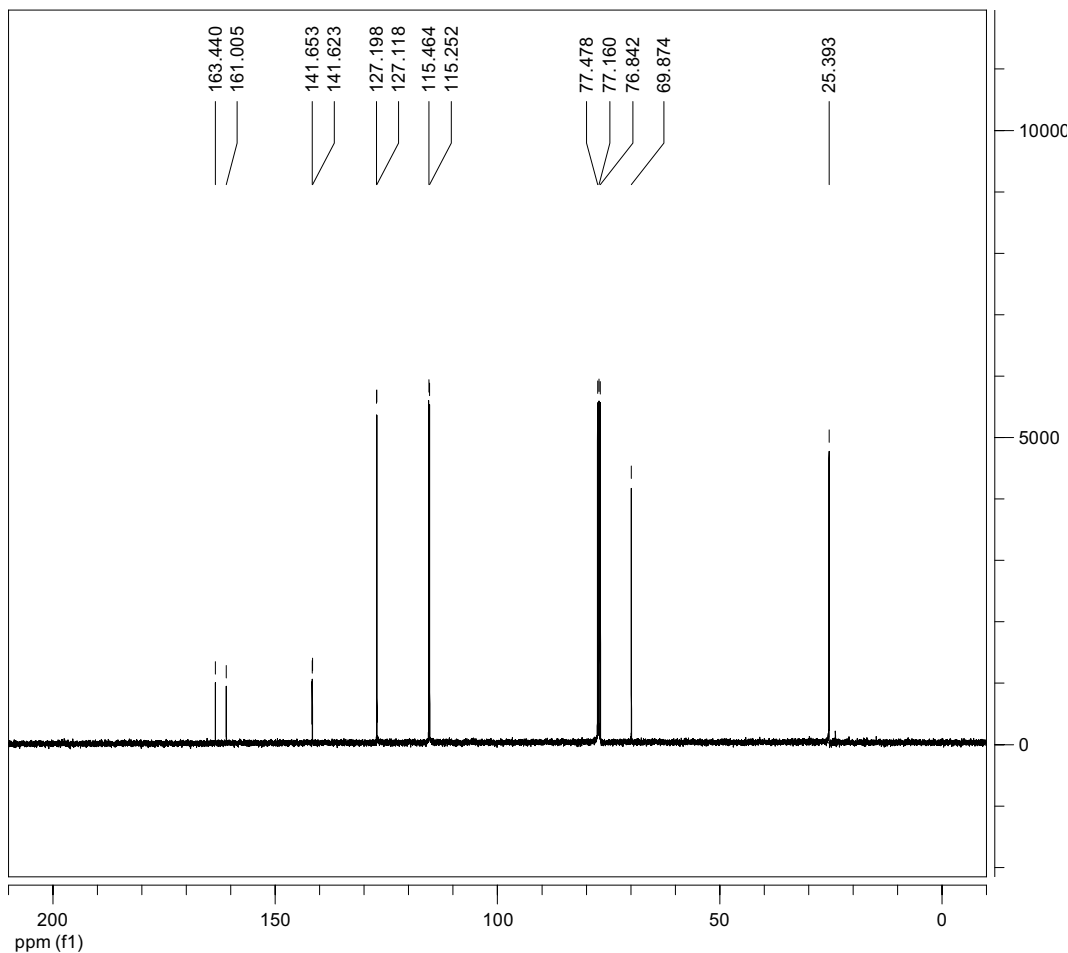

**Date:** 27 May 2012  
**Document's Title:** fid  
**Spectrum Title:**  
**Frequency (MHz):** (f1) 100.630  
**Original Points Count:** (f1) 32768  
**Actual Points Count:** (f1) 65536  
**Acquisition Time (sec):** (f1) 1.3631  
**Spectral Width (ppm):** (f1) 238.879  
**Pulse Program:** ZGPC30  
**Temperature:** 299.1159  
**Number of Scans:** 300  
**Acq. Date:** Mon May 21 11:57:22 PM

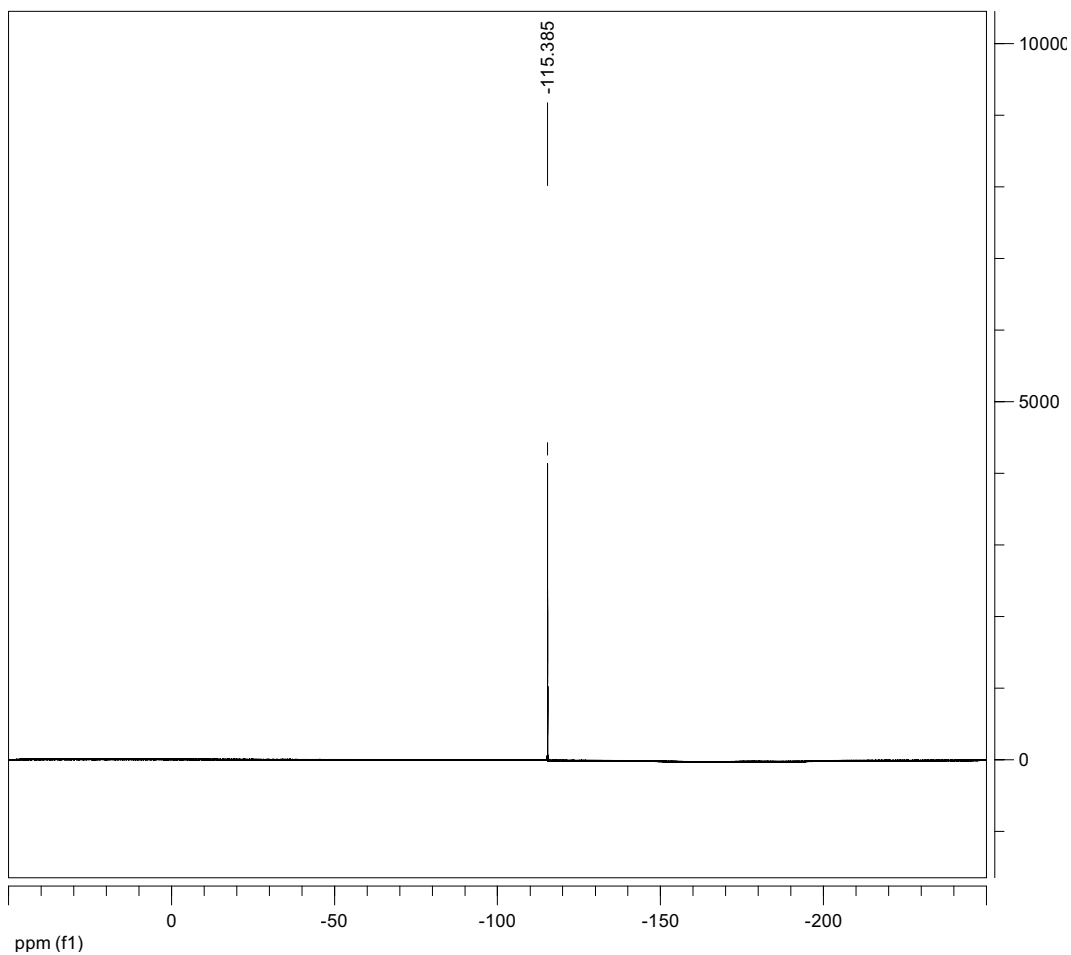

**Date:**  
27 May 2012  
**Document's Title:**  
fid  
**Spectrum Title:**  
  
**Frequency (MHz):**  
(f1) 376.489  
**Original Points Count:**  
(f1) 65536  
**Actual Points Count:**  
(f1) 131072  
**Acquisition Time (sec):**  
(f1) 0.5767  
**Spectral Width (ppm):**  
(f1) 301.832  
**Pulse Program:**  
ZGFLQN  
**Temperature:**  
299.1125  
**Number of Scans:**  
16  
**Acq. Date:**  
Mon May 21 01:21:24 PM

## 2,2,2-Trifluoro-1-phenylethanol

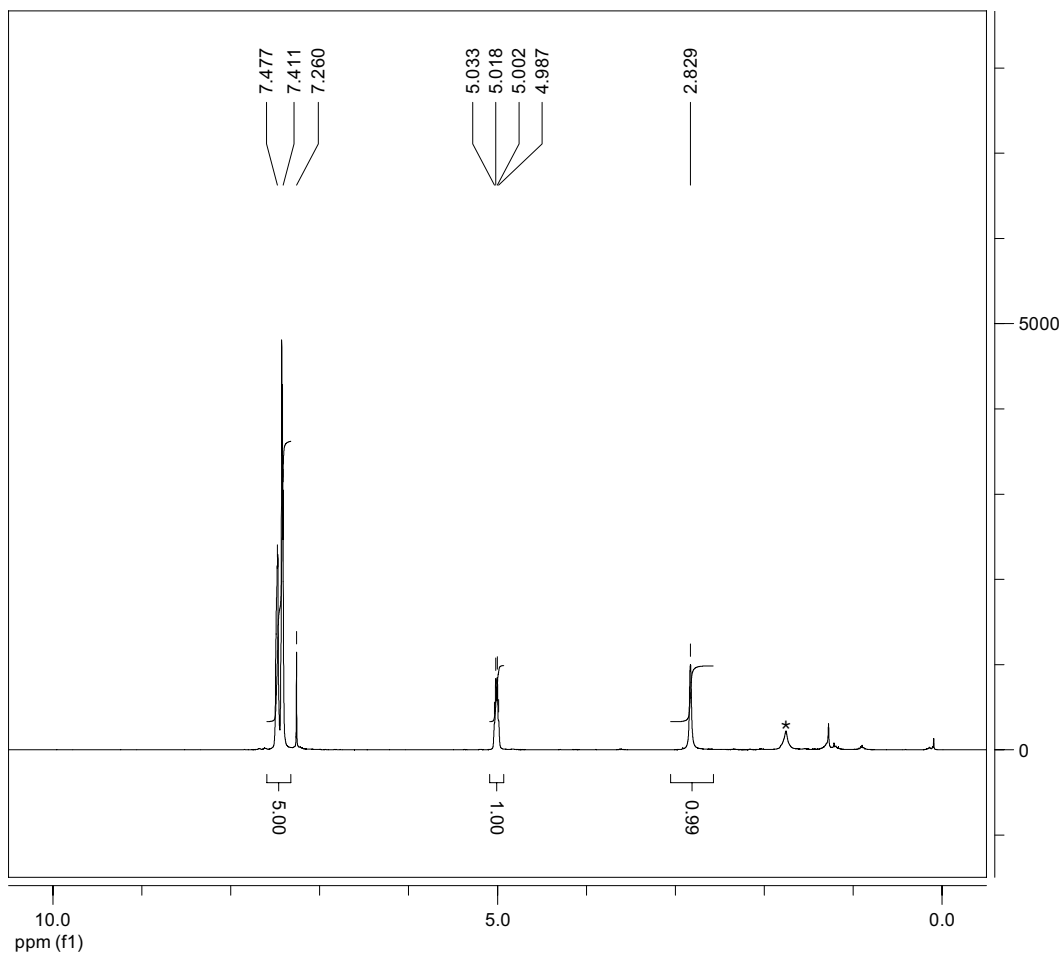

**Date:**  
27 May 2012  
**Document's Title:**  
fid  
**Spectrum Title:**  
**Frequency (MHz):**  
(f1) 400.162  
**Original Points Count:**  
(f1) 32768  
**Actual Points Count:**  
(f1) 65536  
**Acquisition Time (sec):**  
(f1) 3.9846  
**Spectral Width (ppm):**  
(f1) 20.551  
**Pulse Program:**  
ZG30  
**Temperature:**  
299.1118  
**Number of Scans:**  
8  
**Acq. Date:**  
Mon May 21 09:44:57 AM

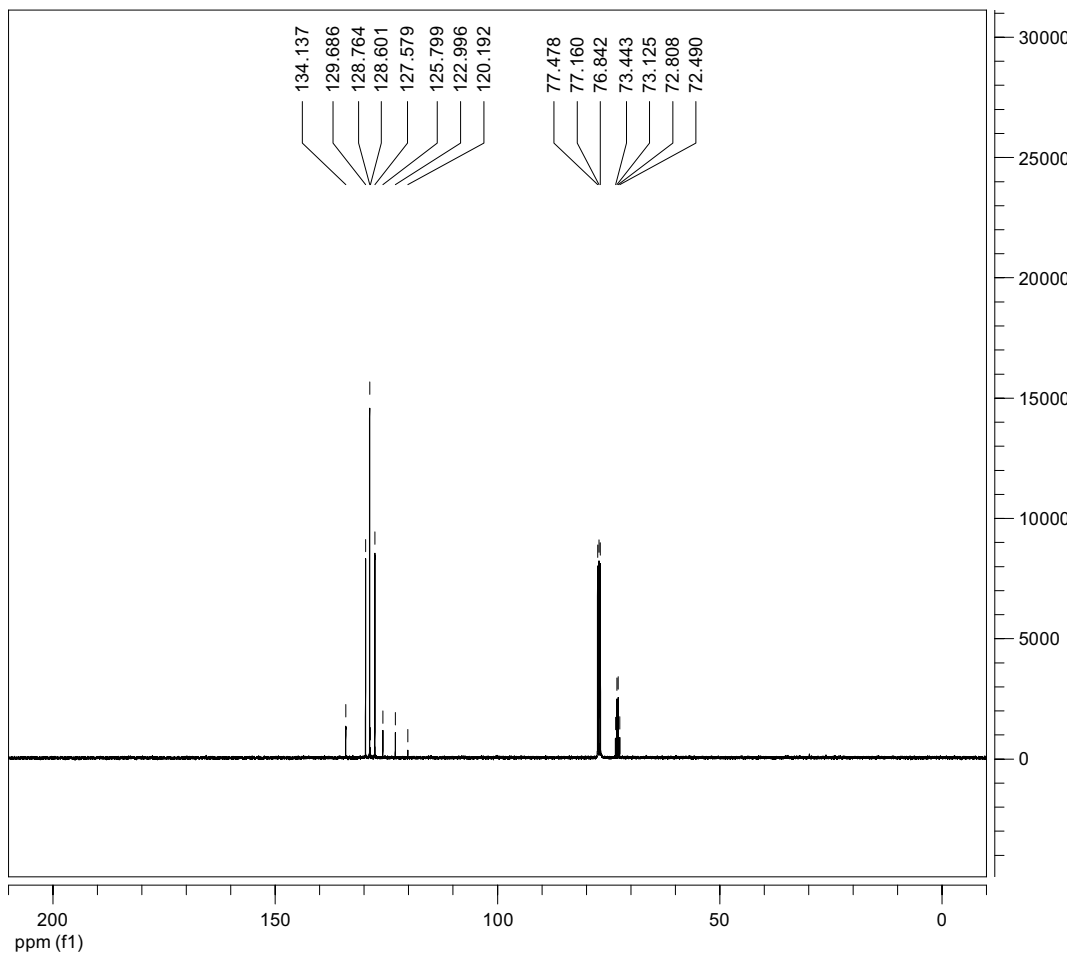

**Date:**  
27 May 2012  
**Document's Title:**  
fid  
**Spectrum Title:**  
**Frequency (MHz):**  
(f1) 100.630  
**Original Points Count:**  
(f1) 32768  
**Actual Points Count:**  
(f1) 65536  
**Acquisition Time (sec):**  
(f1) 1.3631  
**Spectral Width (ppm):**  
(f1) 238.879  
**Pulse Program:**  
ZGPC30  
**Temperature:**  
299.1127  
**Number of Scans:**  
512  
**Acq. Date:**  
Mon May 21 10:52:32 PM

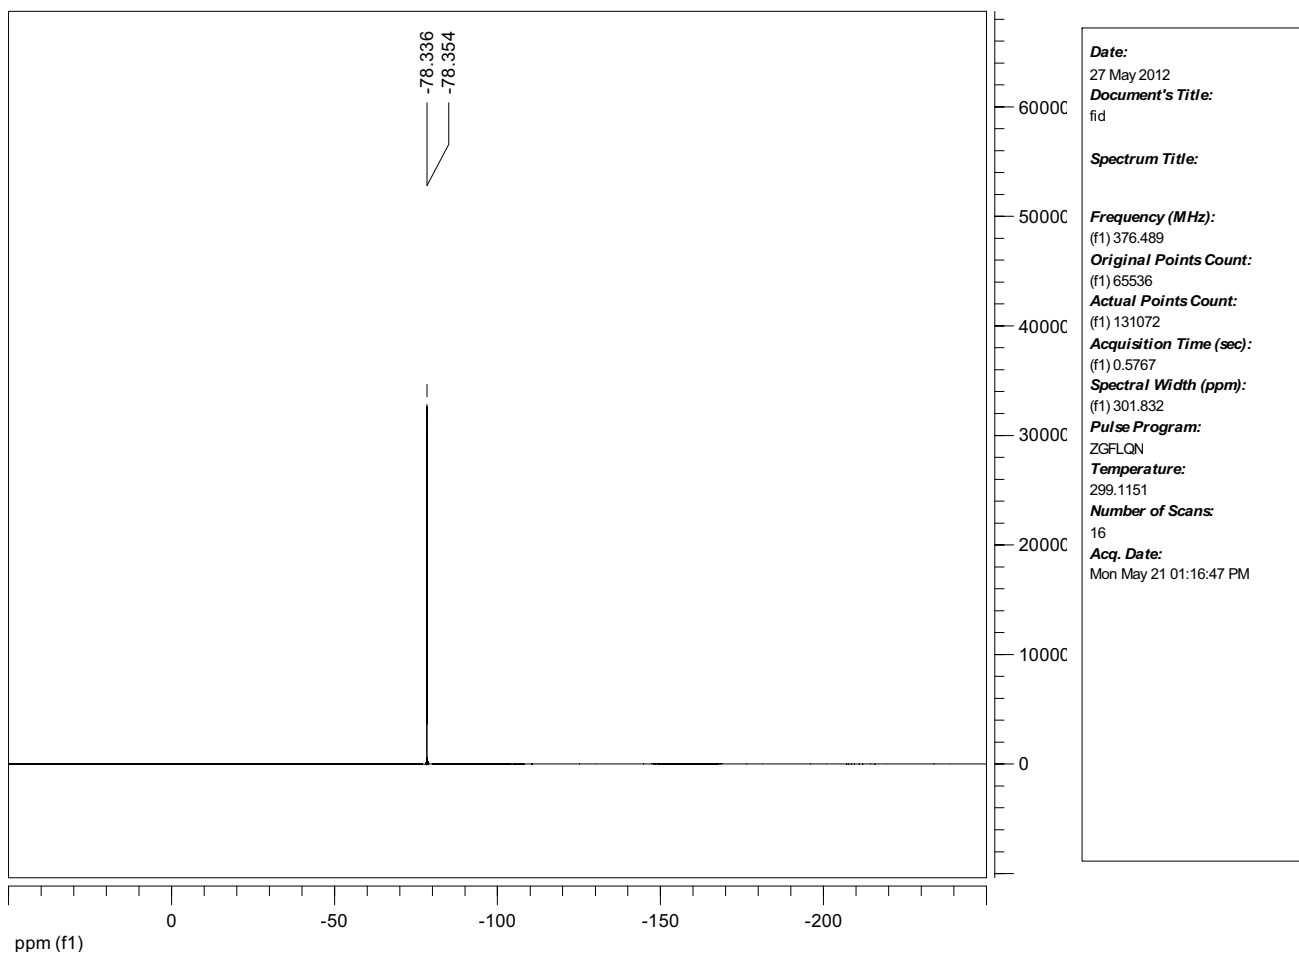

# 1-Mesitylethanol

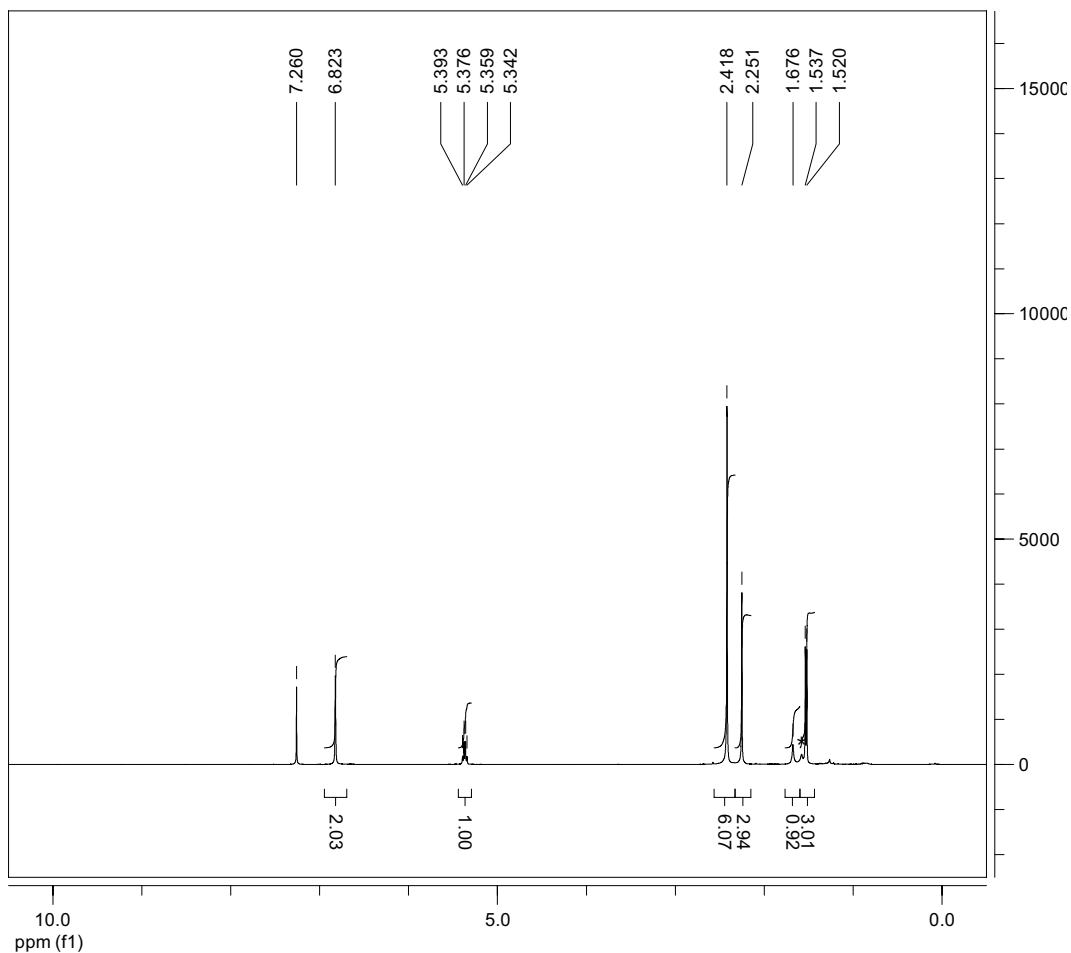

**Date:** 27 May 2012  
**Document's Title:** fid  
**Spectrum Title:**  
**Frequency (MHz):** (f1) 400.162  
**Original Points Count:** (f1) 32768  
**Actual Points Count:** (f1) 65536  
**Acquisition Time (sec):** (f1) 3.9846  
**Spectral Width (ppm):** (f1) 20.551  
**Pulse Program:** ZG30  
**Temperature:** 299.1221  
**Number of Scans:** 8  
**Acq. Date:** Tue May 01 09:12:20 AM

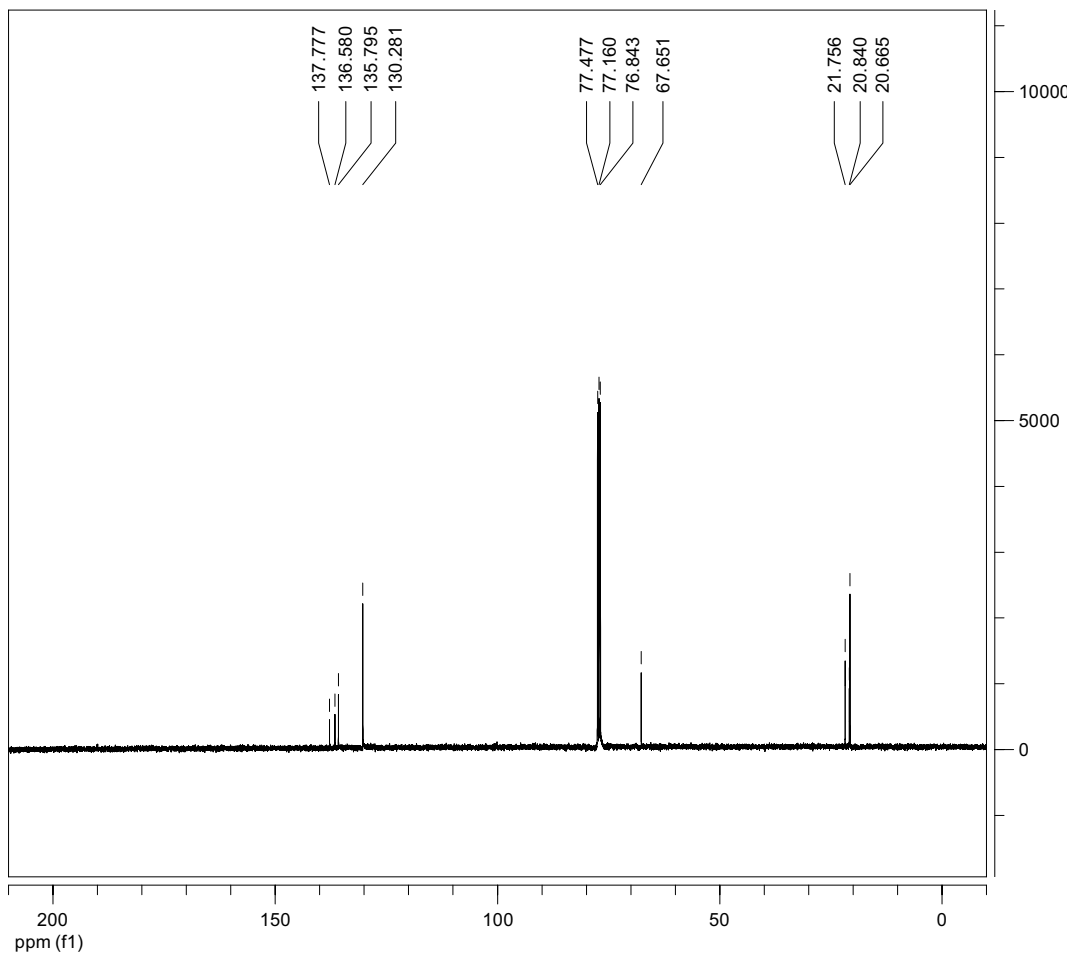

**Date:** 27 May 2012  
**Document's Title:** fid  
**Spectrum Title:**  
**Frequency (MHz):** (f1) 100.630  
**Original Points Count:** (f1) 32768  
**Actual Points Count:** (f1) 65536  
**Acquisition Time (sec):** (f1) 1.3631  
**Spectral Width (ppm):** (f1) 238.879  
**Pulse Program:** ZGPC30  
**Temperature:** 299.0793  
**Number of Scans:** 512  
**Acq. Date:** Tue May 01 09:43:25 AM

### 2-Methyl-1-phenylpropan-1-ol

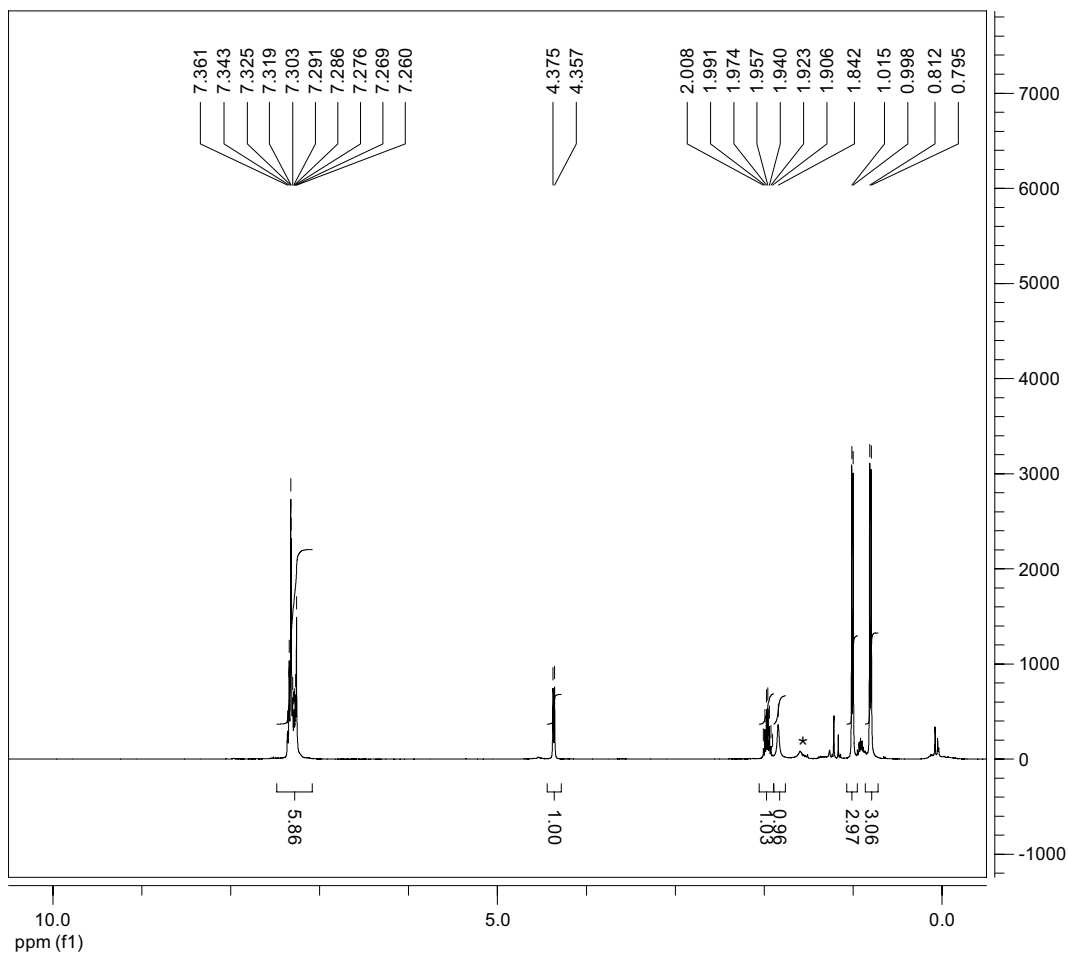

**Date:** 27 May 2012  
**Document's Title:** fid  
**Spectrum Title:**  
**Frequency (MHz):** (f1) 400.162  
**Original Points Count:** (f1) 32768  
**Actual Points Count:** (f1) 65536  
**Acquisition Time (sec):** (f1) 3.9846  
**Spectral Width (ppm):** (f1) 20.551  
**Pulse Program:** ZG30  
**Temperature:** 299.0927  
**Number of Scans:** 8  
**Acq. Date:** Wed May 02 09:38:00 PM

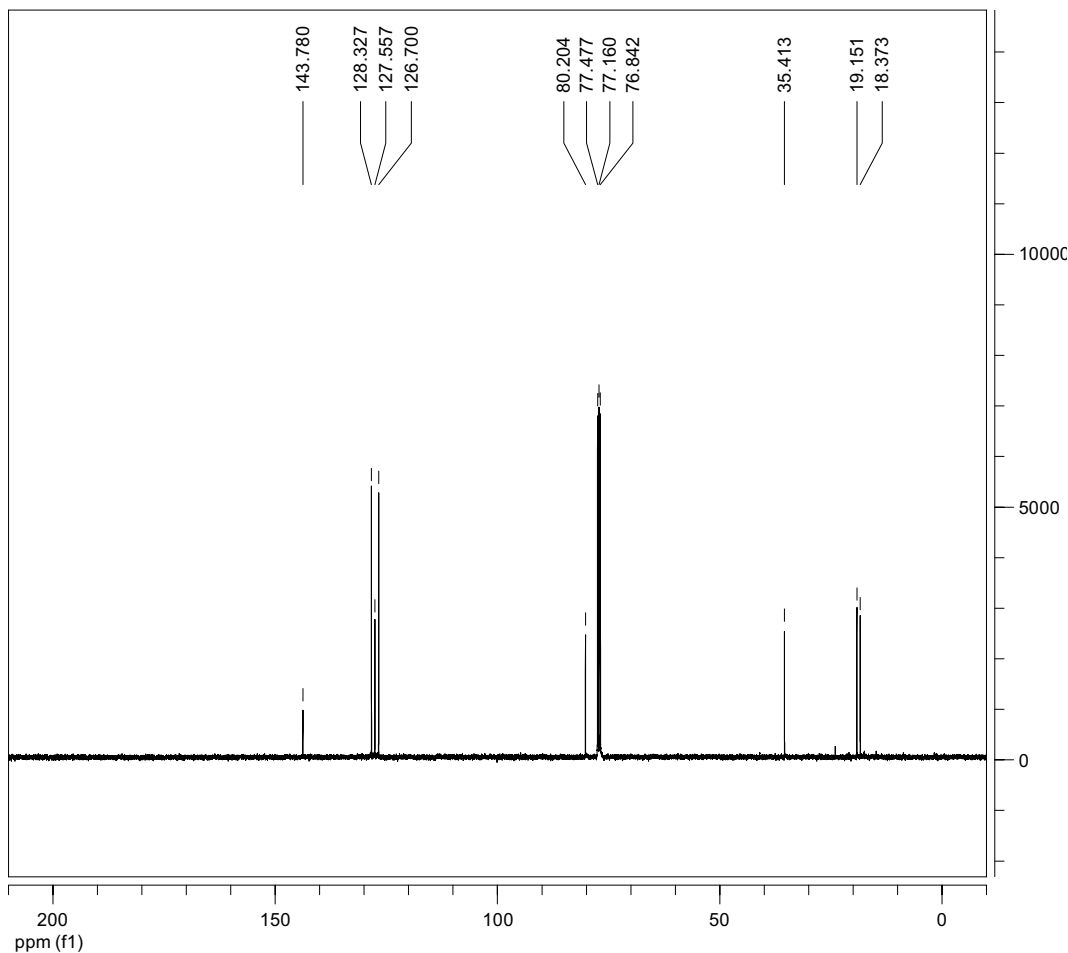

**Date:** 27 May 2012  
**Document's Title:** fid  
**Spectrum Title:**  
**Frequency (MHz):** (f1) 100.630  
**Original Points Count:** (f1) 32768  
**Actual Points Count:** (f1) 65536  
**Acquisition Time (sec):** (f1) 1.3631  
**Spectral Width (ppm):** (f1) 238.879  
**Pulse Program:** ZGPC30  
**Temperature:** 299.066  
**Number of Scans:** 512  
**Acq. Date:** Wed May 02 09:36:32 PM

## 2,2-Dimethyl-1-phenylpropan-1-ol

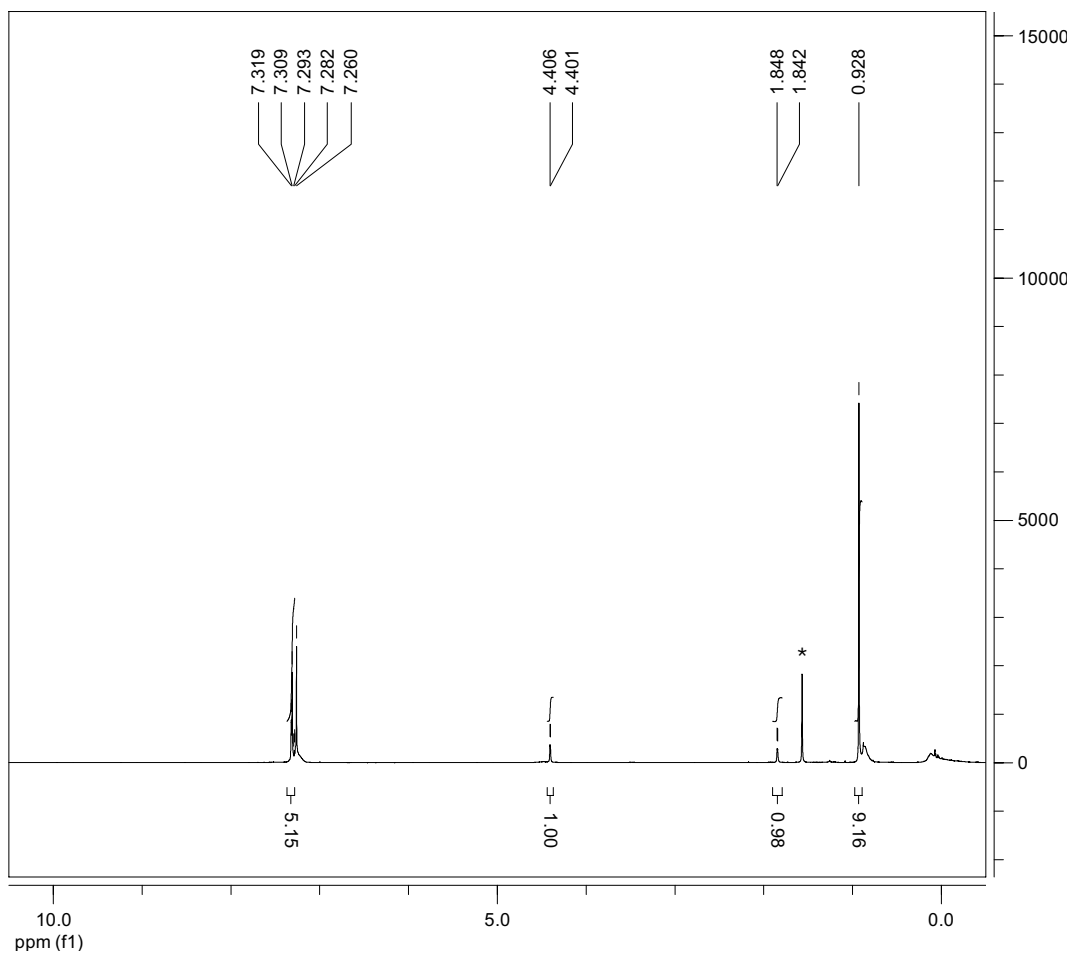

**Date:**  
27 Jun 2012  
**Document's Title:**  
fid  
**Spectrum Title:**  
**Frequency (MHz):**  
(f1) 400.162  
**Original Points Count:**  
(f1) 32768  
**Actual Points Count:**  
(f1) 65536  
**Acquisition Time (sec):**  
(f1) 3.9846  
**Spectral Width (ppm):**  
(f1) 20.551  
**Pulse Program:**  
ZG30  
**Temperature:**  
299.0928  
**Number of Scans:**  
8  
**Acq. Date:**  
Fri Jun 22 05:59:18 PM

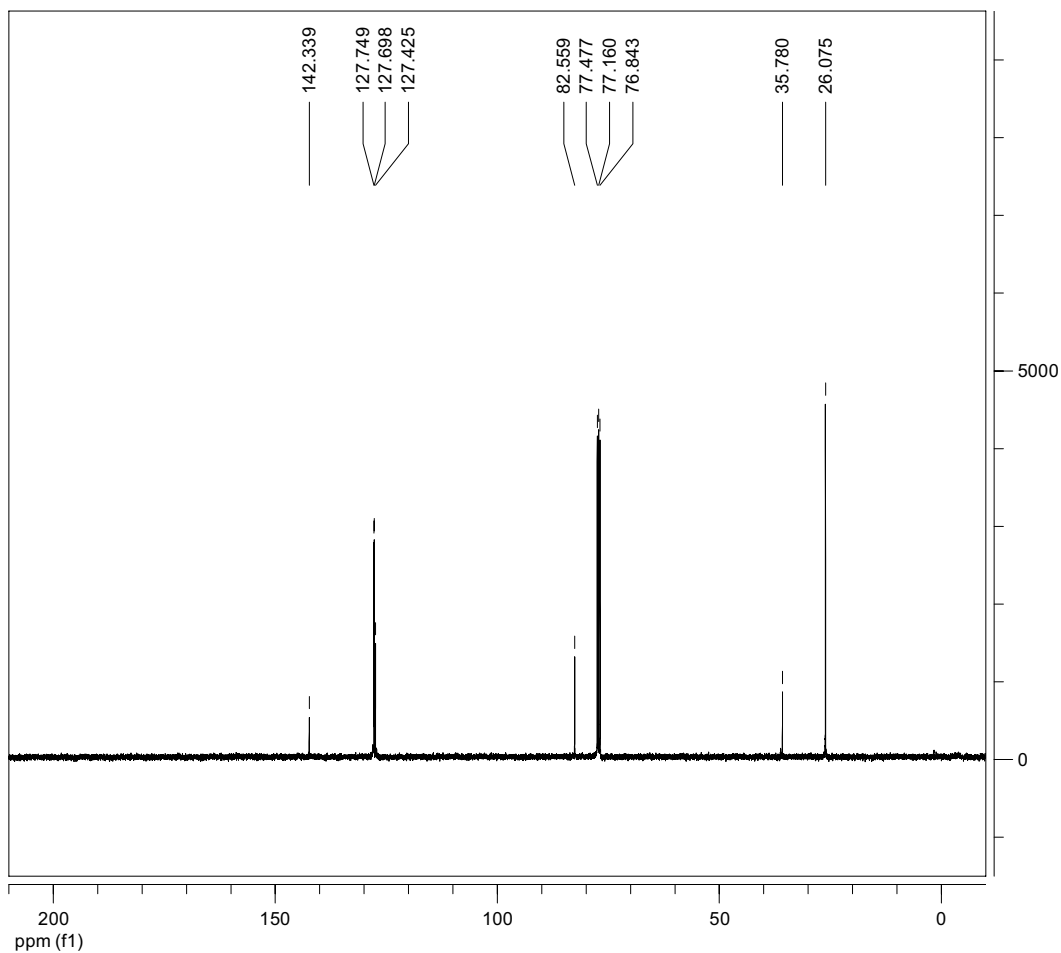

**Date:**  
24 Jun 2012  
**Document's Title:**  
fid  
**Spectrum Title:**  
**Frequency (MHz):**  
(f1) 100.630  
**Original Points Count:**  
(f1) 32768  
**Actual Points Count:**  
(f1) 65536  
**Acquisition Time (sec):**  
(f1) 1.3631  
**Spectral Width (ppm):**  
(f1) 238.879  
**Pulse Program:**  
ZGPC30  
**Temperature:**  
299.1163  
**Number of Scans:**  
300  
**Acq. Date:**  
Sun Jun 10 08:21:35 PM



### 4-Phenyl-2-butanol

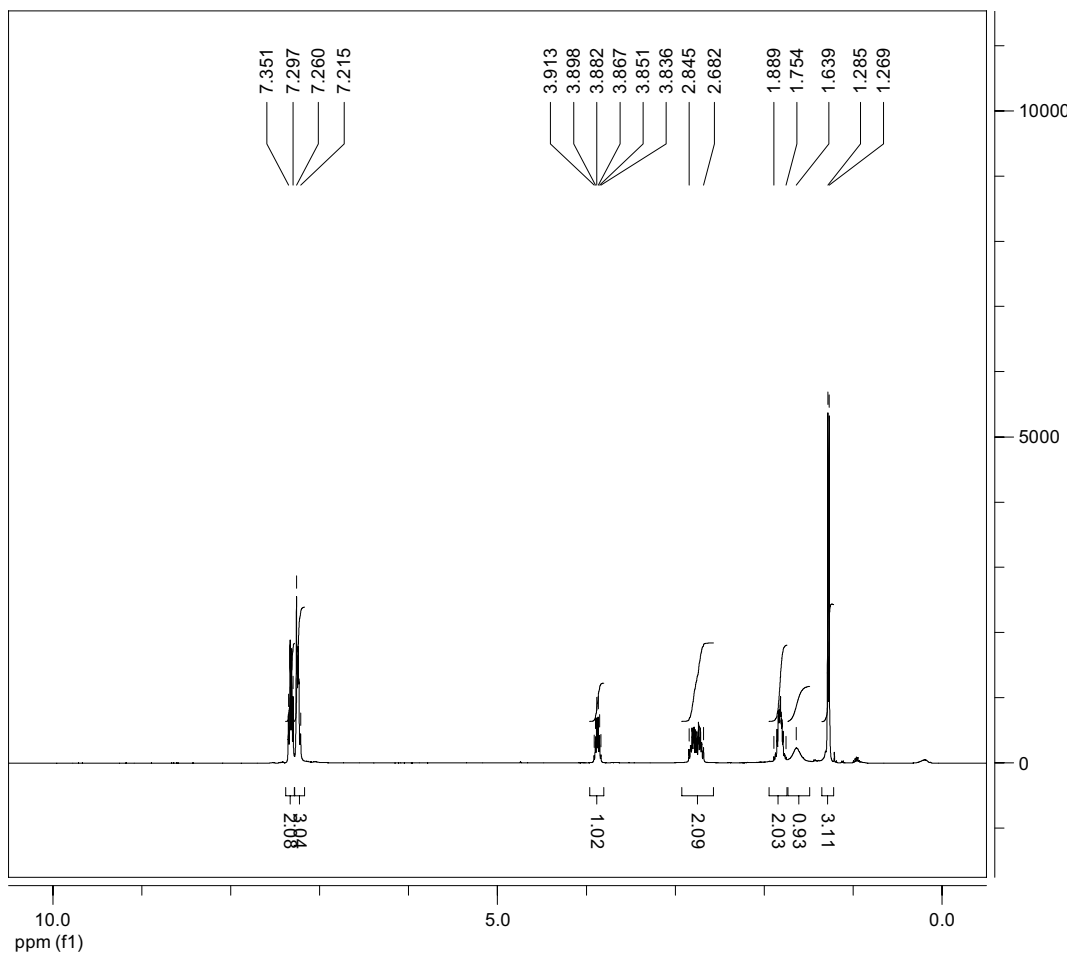

**Date:** 27 May 2012  
**Document's Title:** fid  
**Spectrum Title:**  
**Frequency (MHz):** (f1) 400.162  
**Original Points Count:** (f1) 32768  
**Actual Points Count:** (f1) 65536  
**Acquisition Time (sec):** (f1) 3.9846  
**Spectral Width (ppm):** (f1) 20.551  
**Pulse Program:** ZG30  
**Temperature:** 299.1136  
**Number of Scans:** 8  
**Acq. Date:** Mon May 21 09:58:22 AM

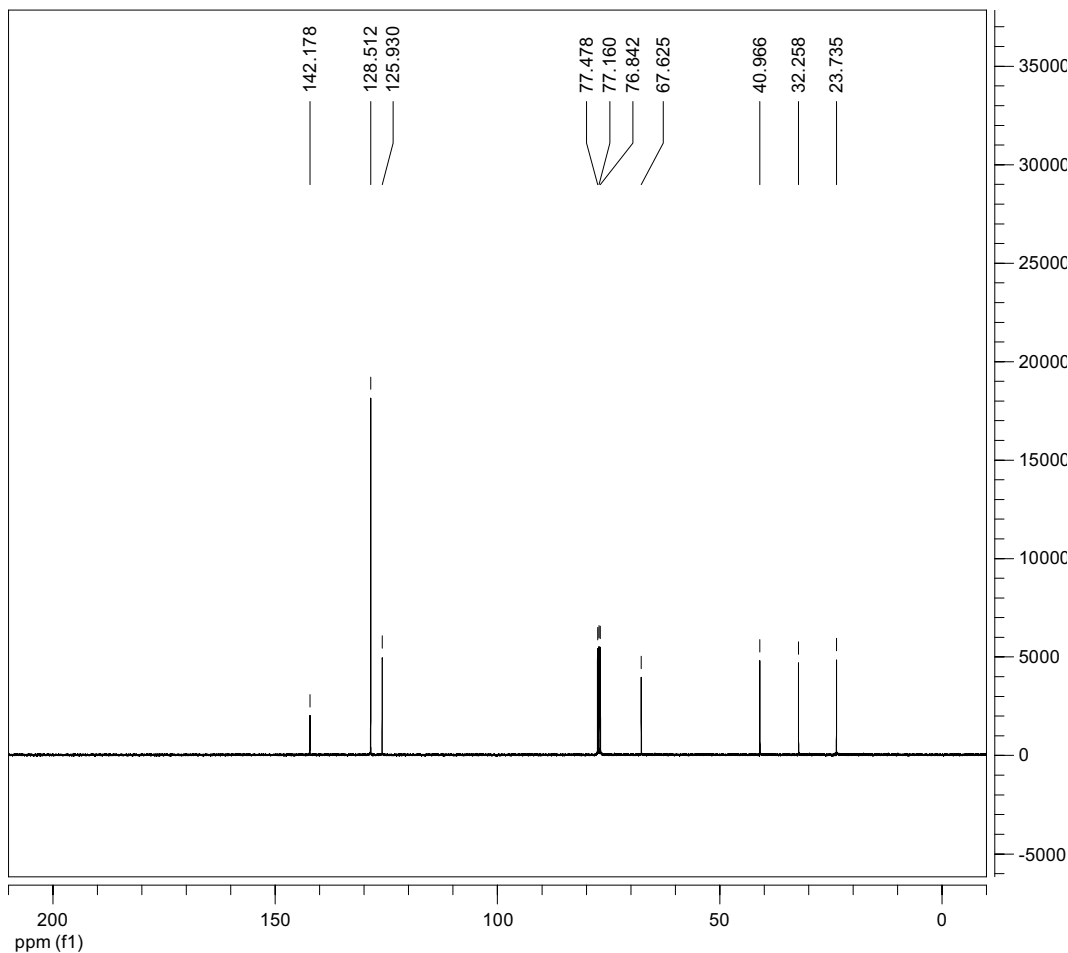

**Date:** 27 May 2012  
**Document's Title:** fid  
**Spectrum Title:**  
**Frequency (MHz):** (f1) 100.630  
**Original Points Count:** (f1) 32768  
**Actual Points Count:** (f1) 65536  
**Acquisition Time (sec):** (f1) 1.3631  
**Spectral Width (ppm):** (f1) 238.879  
**Pulse Program:** ZGPC30  
**Temperature:** 299.1134  
**Number of Scans:** 300  
**Acq. Date:** Mon May 21 11:14:10 PM

## 2-Undecanol

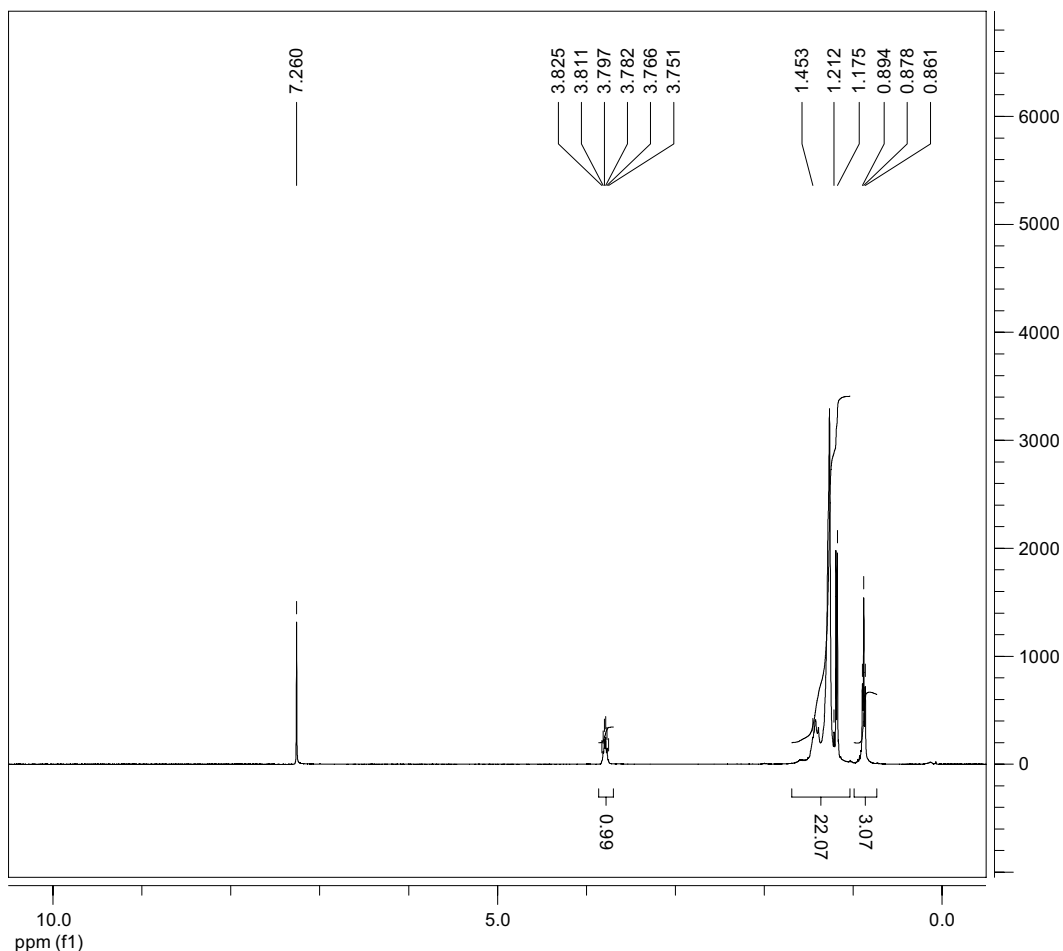

**Date:**  
27 May 2012  
**Document's Title:**  
fid  
**Spectrum Title:**  
**Frequency (MHz):**  
(f1) 400.162  
**Original Points Count:**  
(f1) 32768  
**Actual Points Count:**  
(f1) 65536  
**Acquisition Time (sec):**  
(f1) 3.9846  
**Spectral Width (ppm):**  
(f1) 20.551  
**Pulse Program:**  
ZG30  
**Temperature:**  
299.1127  
**Number of Scans:**  
8  
**Acq. Date:**  
Tue May 01 11:06:45 AM

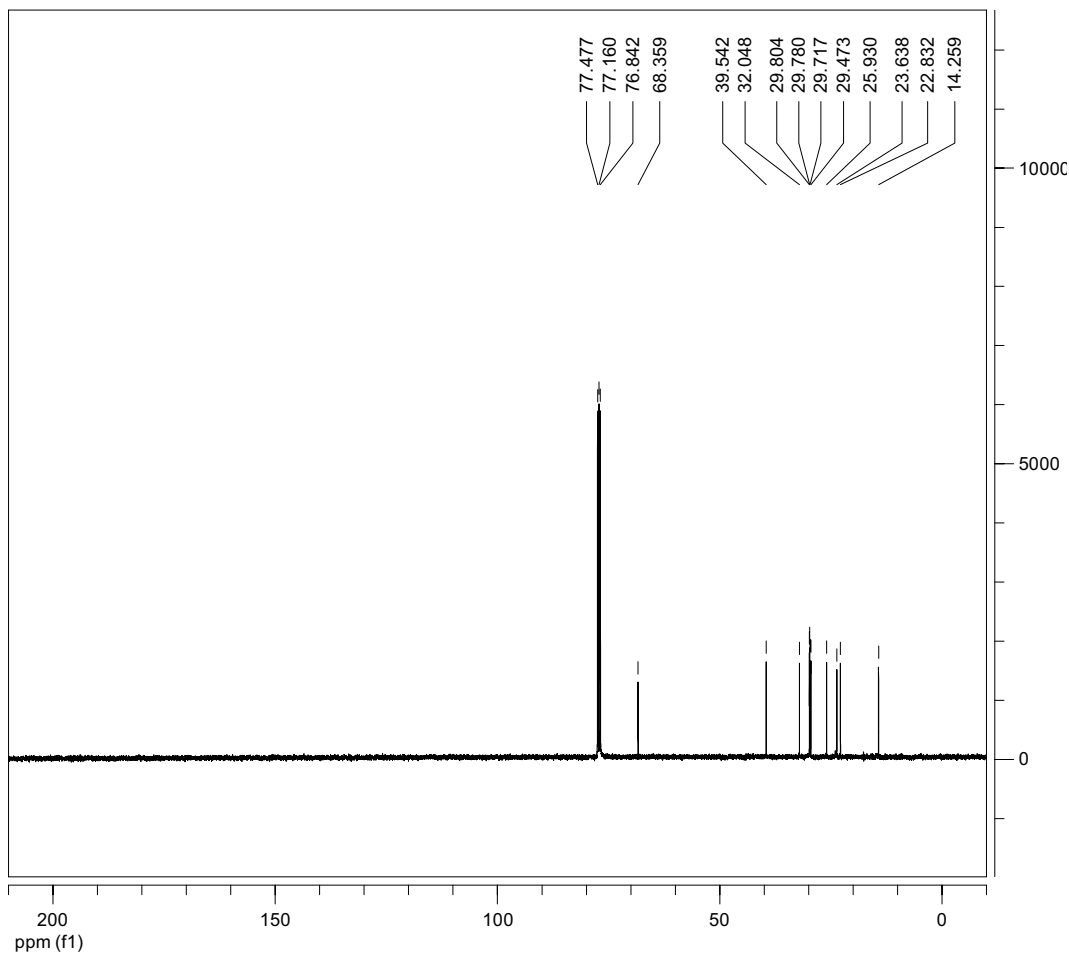

**Date:**  
27 May 2012  
**Document's Title:**  
fid  
**Spectrum Title:**  
**Frequency (MHz):**  
(f1) 100.630  
**Original Points Count:**  
(f1) 32768  
**Actual Points Count:**  
(f1) 65536  
**Acquisition Time (sec):**  
(f1) 1.3631  
**Spectral Width (ppm):**  
(f1) 238.879  
**Pulse Program:**  
ZGPC30  
**Temperature:**  
299.1167  
**Number of Scans:**  
512  
**Acq. Date:**  
Tue May 01 11:37:50 AM

# Cycloheptanol

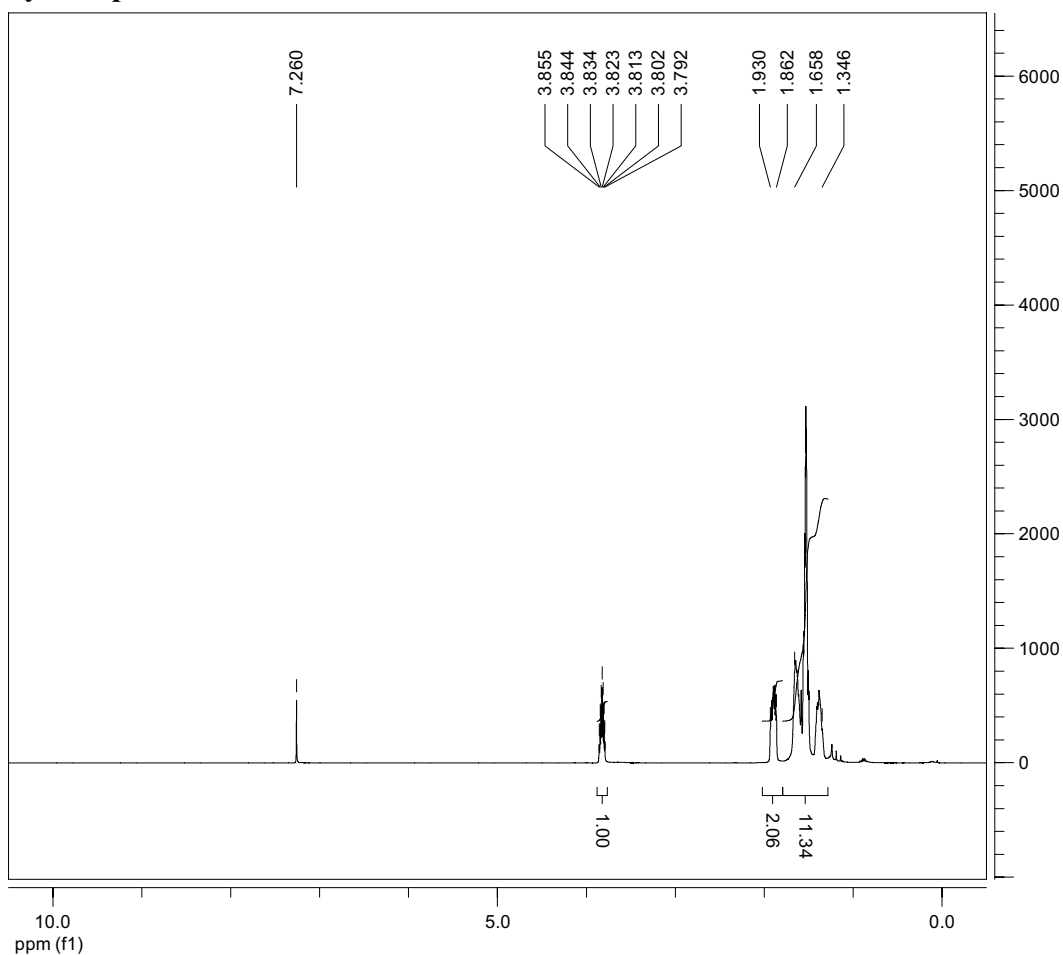

**Date:** 27 May 2012  
**Document's Title:** fid  
**Spectrum Title:**  
**Frequency (MHz):** (f1) 400.162  
**Original Points Count:** (f1) 32768  
**Actual Points Count:** (f1) 65536  
**Acquisition Time (sec):** (f1) 3.9846  
**Spectral Width (ppm):** (f1) 20.551  
**Pulse Program:** ZG30  
**Temperature:** 299.1129  
**Number of Scans:** 8  
**Acq. Date:** Mon May 21 09:40:37 AM

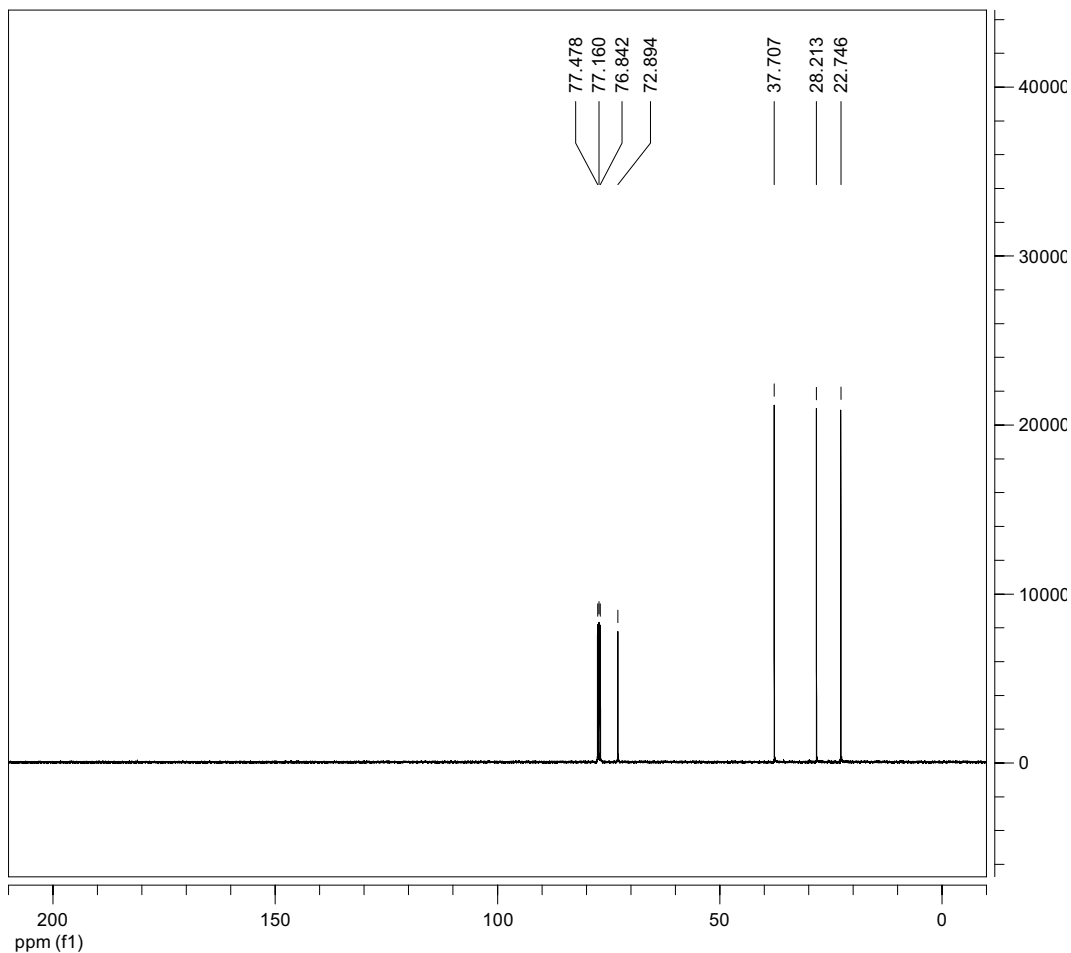

**Date:** 27 May 2012  
**Document's Title:** fid  
**Spectrum Title:**  
**Frequency (MHz):** (f1) 100.630  
**Original Points Count:** (f1) 32768  
**Actual Points Count:** (f1) 65536  
**Acquisition Time (sec):** (f1) 1.3631  
**Spectral Width (ppm):** (f1) 238.879  
**Pulse Program:** ZGPC30  
**Temperature:** 299.114  
**Number of Scans:** 512  
**Acq. Date:** Mon May 21 10:18:49 PM

### Alpha-tetralol

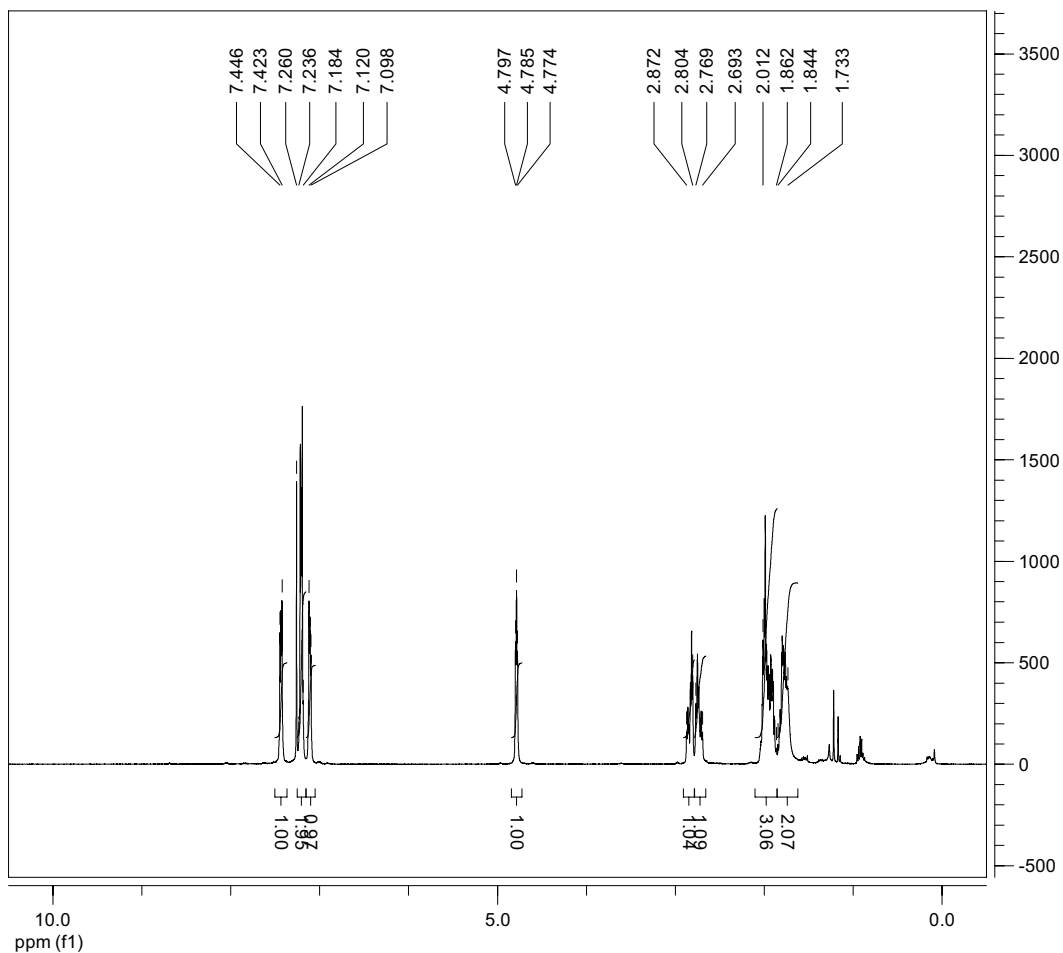

**Date:** 27 May 2012  
**Document's Title:** fid  
**Spectrum Title:**  
**Frequency (MHz):** (f1) 400.162  
**Original Points Count:** (f1) 32768  
**Actual Points Count:** (f1) 65536  
**Acquisition Time (sec):** (f1) 3.9846  
**Spectral Width (ppm):** (f1) 20.551  
**Pulse Program:** ZG30  
**Temperature:** 299.1239  
**Number of Scans:** 8  
**Acq. Date:** Mon May 07 12:42:58 AM

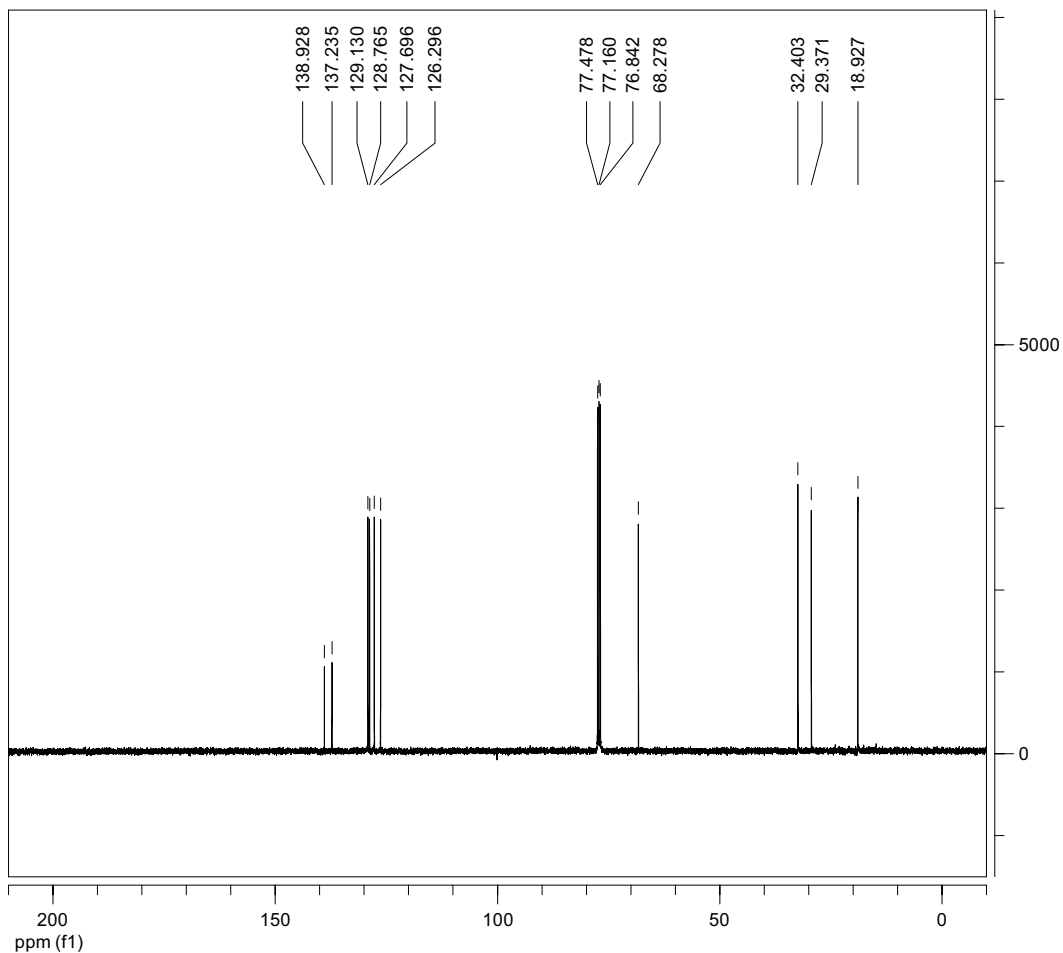

**Date:** 27 May 2012  
**Document's Title:** fid  
**Spectrum Title:**  
**Frequency (MHz):** (f1) 100.630  
**Original Points Count:** (f1) 32768  
**Actual Points Count:** (f1) 65536  
**Acquisition Time (sec):** (f1) 1.3631  
**Spectral Width (ppm):** (f1) 238.879  
**Pulse Program:** ZGPC30  
**Temperature:** 299.1165  
**Number of Scans:** 350  
**Acq. Date:** Tue May 08 09:23:28 AM

### 1-Indanol

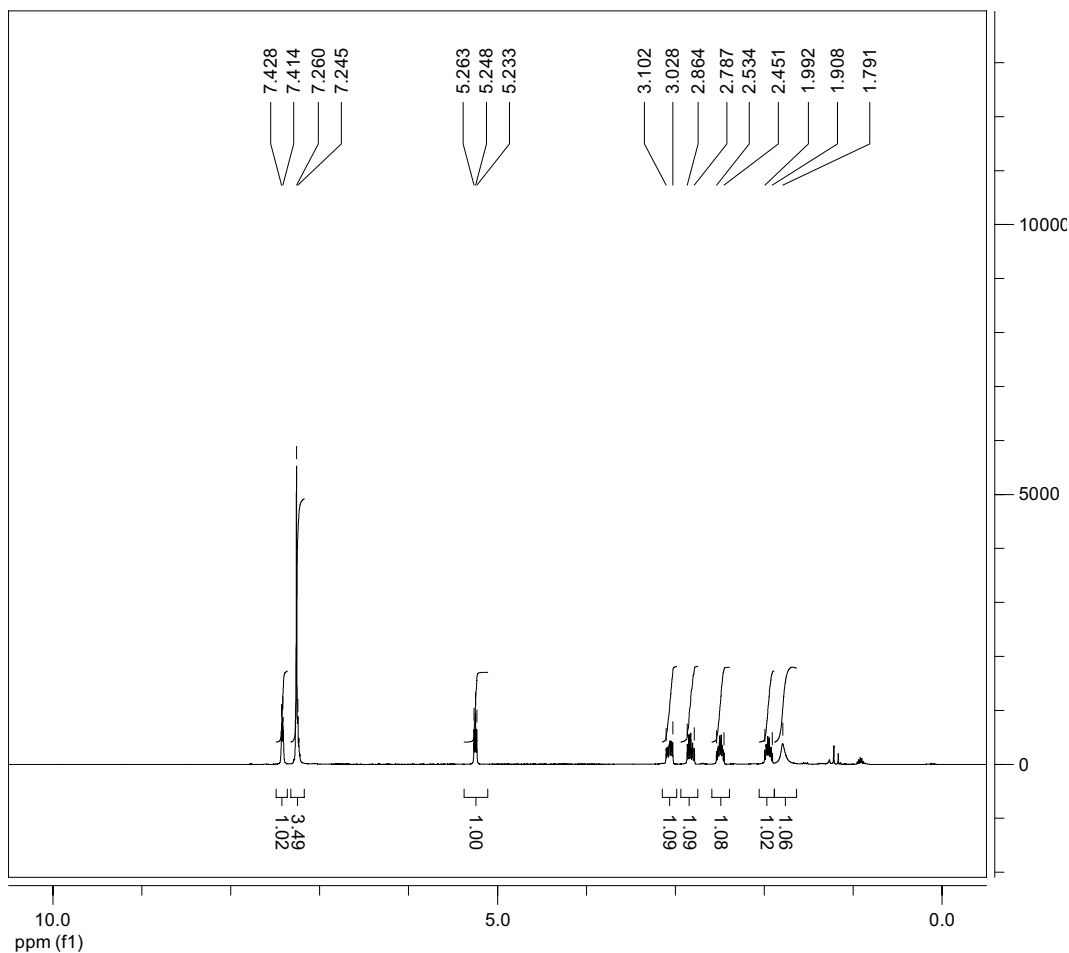

**Date:**  
27 May 2012  
**Document's Title:**  
fid  
**Spectrum Title:**  
**Frequency (MHz):**  
(f1) 400.162  
**Original Points Count:**  
(f1) 32768  
**Actual Points Count:**  
(f1) 65536  
**Acquisition Time (sec):**  
(f1) 3.9846  
**Spectral Width (ppm):**  
(f1) 20.551  
**Pulse Program:**  
ZG30  
**Temperature:**  
299.1234  
**Number of Scans:**  
8  
**Acq. Date:**  
Wed May 02 09:42:01 PM

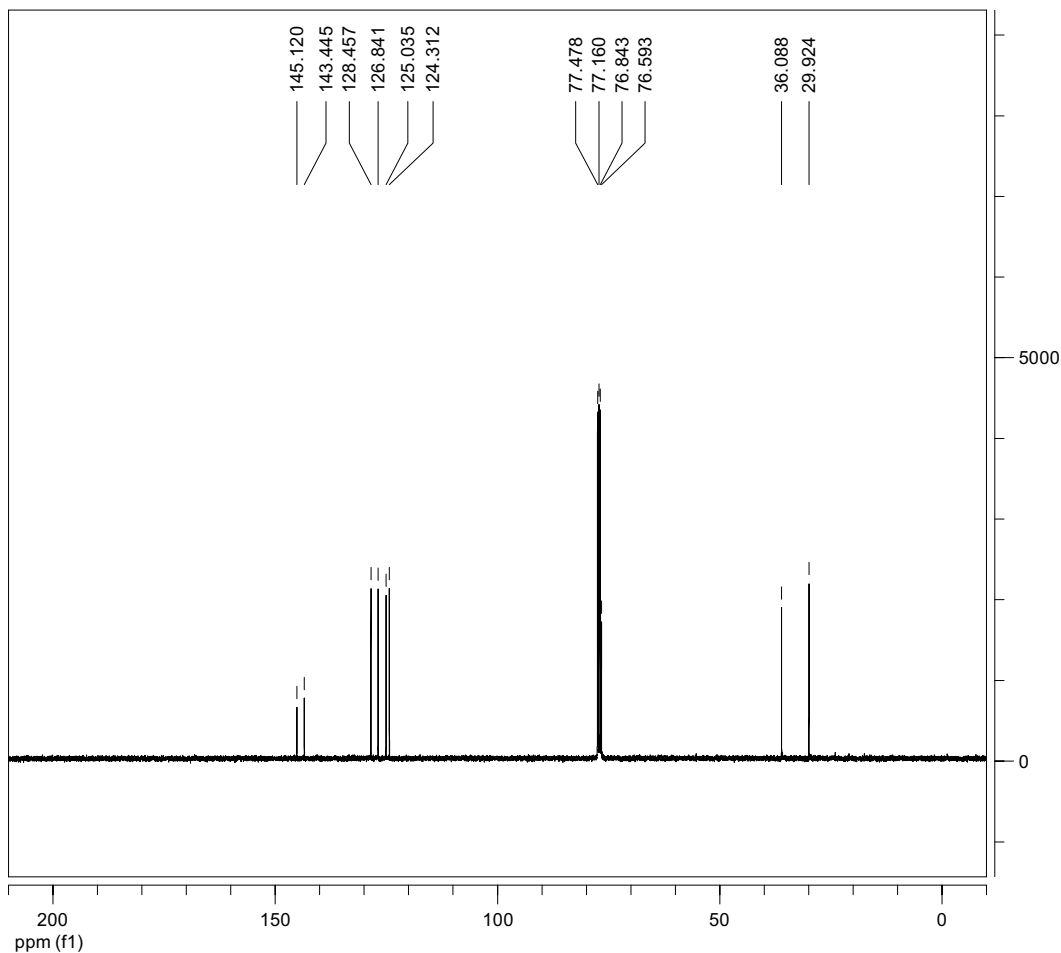

**Date:**  
27 May 2012  
**Document's Title:**  
fid  
**Spectrum Title:**  
**Frequency (MHz):**  
(f1) 100.630  
**Original Points Count:**  
(f1) 32768  
**Actual Points Count:**  
(f1) 65536  
**Acquisition Time (sec):**  
(f1) 1.3631  
**Spectral Width (ppm):**  
(f1) 238.879  
**Pulse Program:**  
ZGPC30  
**Temperature:**  
299.0992  
**Number of Scans:**  
512  
**Acq. Date:**  
Wed May 02 10:13:50 PM

### 1-(2,5-Dimethylfuran-3-yl)ethanol

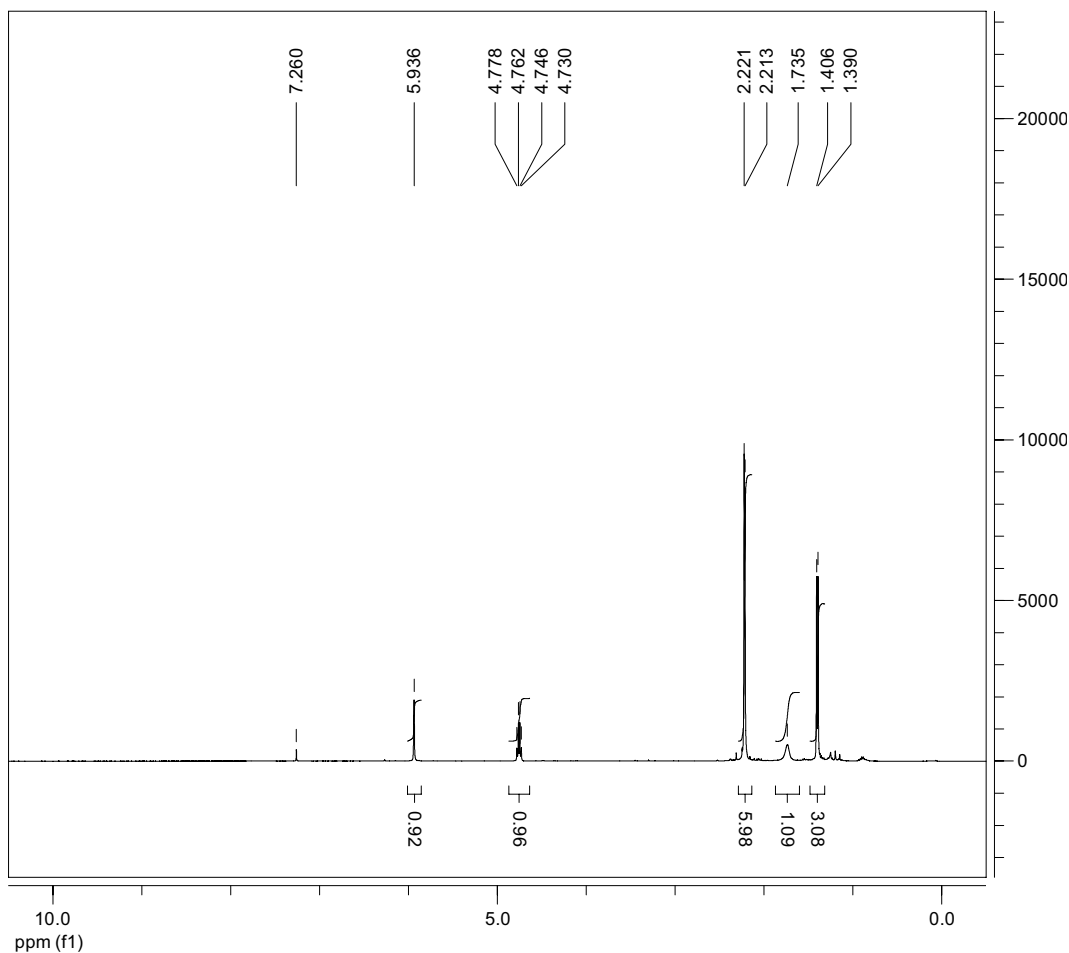

**Date:** 27 May 2012  
**Document's Title:** fid  
**Spectrum Title:**  
**Frequency (MHz):** (f1) 400.162  
**Original Points Count:** (f1) 32768  
**Actual Points Count:** (f1) 65536  
**Acquisition Time (sec):** (f1) 3.9846  
**Spectral Width (ppm):** (f1) 20.551  
**Pulse Program:** ZG30  
**Temperature:** 299.1147  
**Number of Scans:** 8  
**Acq. Date:** Mon May 21 10:14:06 AM

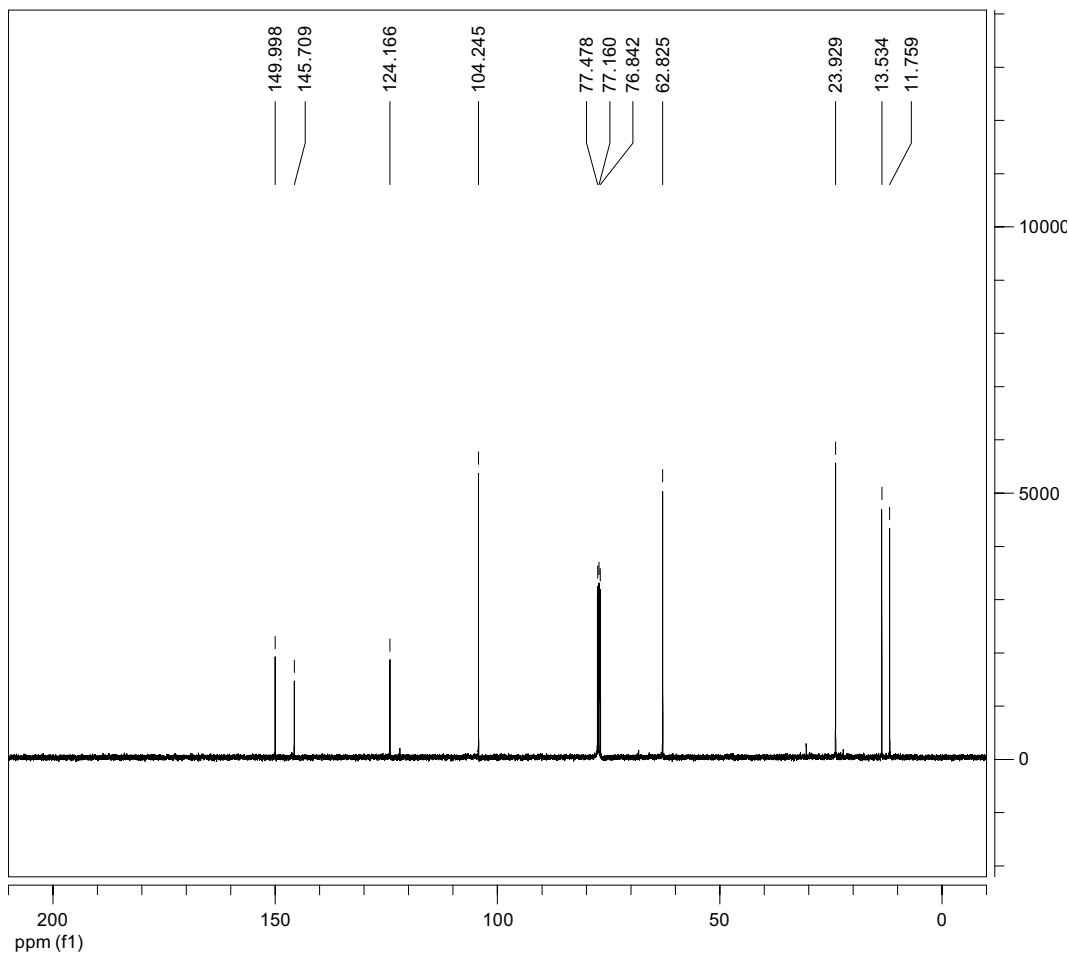

**Date:** 27 May 2012  
**Document's Title:** fid  
**Spectrum Title:**  
**Frequency (MHz):** (f1) 100.630  
**Original Points Count:** (f1) 32768  
**Actual Points Count:** (f1) 65536  
**Acquisition Time (sec):** (f1) 1.3631  
**Spectral Width (ppm):** (f1) 238.879  
**Pulse Program:** ZGPC30  
**Temperature:** 299.1129  
**Number of Scans:** 300  
**Acq. Date:** Mon May 21 11:35:48 PM

## Ferroceneethanol

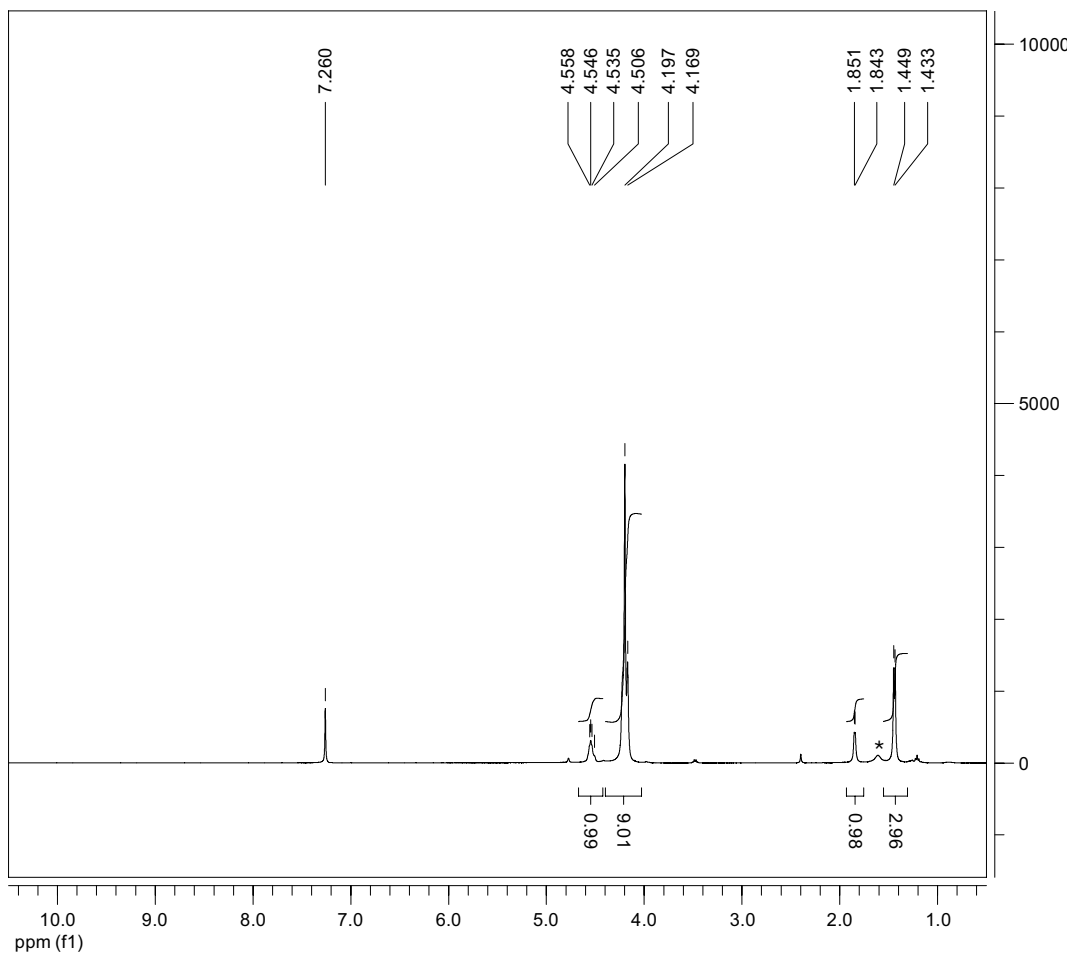

**Date:** 27 May 2012  
**Document's Title:** fid  
**Spectrum Title:**  
**Frequency (MHz):** (f1) 400.162  
**Original Points Count:** (f1) 32768  
**Actual Points Count:** (f1) 65536  
**Acquisition Time (sec):** (f1) 3.9846  
**Spectral Width (ppm):** (f1) 20.551  
**Pulse Program:** ZG30  
**Temperature:** 299.1033  
**Number of Scans:** 8  
**Acq. Date:** Mon May 07 12:38:41 AM

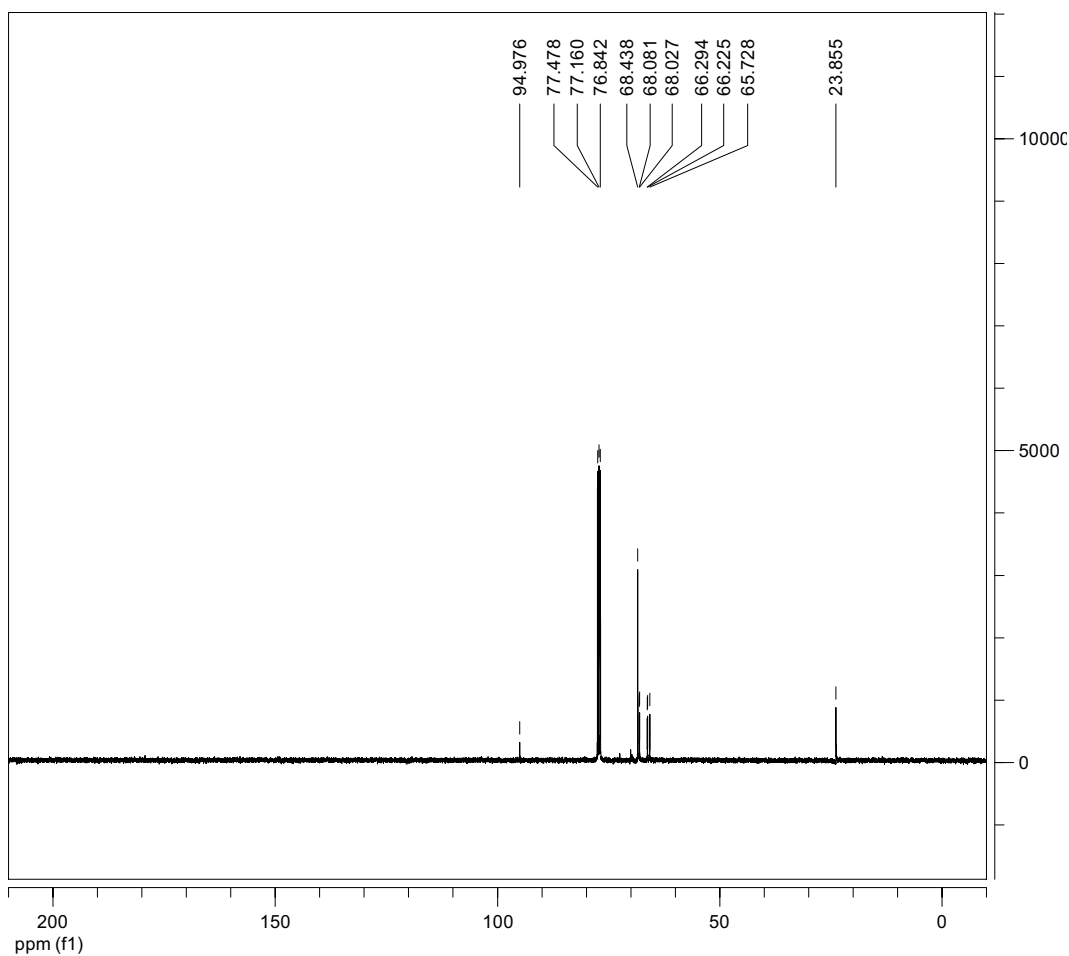

**Date:** 27 May 2012  
**Document's Title:** fid  
**Spectrum Title:**  
**Frequency (MHz):** (f1) 100.630  
**Original Points Count:** (f1) 32768  
**Actual Points Count:** (f1) 65536  
**Acquisition Time (sec):** (f1) 1.3631  
**Spectral Width (ppm):** (f1) 238.879  
**Pulse Program:** ZGPG30  
**Temperature:** 299.0971  
**Number of Scans:** 350  
**Acq. Date:** Tue May 08 08:58:29 AM
